# Supplementary material for: Peer review of the pesticide risk assessment of the active substance copper compounds copper(I), copper(II) variants namely copper hydroxide, copper oxychloride, tribasic copper sulfate, copper(I) oxide, Bordeaux mixture
Source: PubMed Central journal article supplement (PMC7009614; doi:10.2903/j.efsa.2018.5152), 2018-01-16
Supplement: EFS2-16-e05152-s001.pdf [file EFS2-16-e05152-s001.pdf]

Appendix to:

EFSA (European Food Safety Authority), 2018. Conclusion on the peer review of the pesticide risk assessment of the active substance copper compounds. EFSA Journal 2018;16(1):5152, 119 pp. doi:10.2903/j.efsa.2018.5152

© European Food Safety Authority, 2018

## Appendix A - List of end points for the active substance and the representative formulation

### Identity, Physical and Chemical Properties, Details of Uses, Further Information (Regulation (EU) N° 283/2013, Annex Part A, points 1.3 and 3.2)

|                                    |                                                             |
|------------------------------------|-------------------------------------------------------------|
| Active substance (ISO Common Name) | Copper(I), copper(II) and variants (Not an ISO common name) |
| Function ( <i>e.g.</i> fungicide)  | Fungicide and bactericide                                   |
| Rapporteur Member State            | France                                                      |
| Co-rapporteur Member State         | Germany                                                     |

### Identity (Regulation (EU) N° 283/2013, Annex Part A, point 1)

#### Copper hydroxide

|                                                        |                                                                                                                                                                                                   |                                                    |         |         |
|--------------------------------------------------------|---------------------------------------------------------------------------------------------------------------------------------------------------------------------------------------------------|----------------------------------------------------|---------|---------|
| Chemical name (IUPAC)                                  | copper(II) hydroxide or cupric hydroxide                                                                                                                                                          |                                                    |         |         |
| Chemical name (CA)                                     | copper hydroxide                                                                                                                                                                                  |                                                    |         |         |
| CIPAC No                                               | 44.305                                                                                                                                                                                            |                                                    |         |         |
| CAS No                                                 | 20427-59-2                                                                                                                                                                                        |                                                    |         |         |
| EC No (EINECS or ELINCS)                               | 243-815-9                                                                                                                                                                                         |                                                    |         |         |
| FAO Specification (including year of publication)      | FAO specification AGP:CP/362 (1998)                                                                                                                                                               |                                                    |         |         |
|                                                        | Total Cu content<br>(min. % (w/w))                                                                                                                                                                | Max. heavy metals content<br>(expressed in g/g Cu) |         |         |
|                                                        |                                                                                                                                                                                                   | Lead                                               | Cadmium | Arsenic |
|                                                        | 57.3                                                                                                                                                                                              | 0.0005                                             | 0.0001  | 0.0001  |
| Minimum purity of the active substance as manufactured | Expressed as total copper content<br>Albaugh 609 g/kg    Kocide 618 g/kg<br>Cinkarna 616 g/kg    Nufarm 609 g/kg<br>IQV 625 g/kg    Saldeco 584 g/kg<br>Isagro 593 g/kg    Spiess-Urania 583 g/kg |                                                    |         |         |

Identity of relevant impurities (of toxicological, ecotoxicological and/or environmental concern) in the active substance as manufactured

|                                 |                  |
|---------------------------------|------------------|
| Arsenic                         | max. 0.1 mg/g Cu |
| Cadmium                         | max. 0.1 mg/g Cu |
| Lead                            | max. 0.3 mg/g Cu |
| Nickel                          | max. 1 mg/g Cu   |
| Cobalt                          | max. 3 mg/kg     |
| Mercury                         | max. 5 mg/kg     |
| Chromium                        | max. 100 mg/kg   |
| Antimony                        | max. 7 mg/kg     |
| CuH <sub>2</sub> O <sub>2</sub> |                  |
| 97.6                            | g/mol            |
| Cu(OH) <sub>2</sub>             |                  |

Molecular formula

Molar mass

Structural formula

### Copper oxychloride

Chemical name (IUPAC)

Chemical name (CA)

CIPAC No

CAS No

EC No (EINECS or ELINCS)

FAO Specification (including year of publication)

| dicopper(II) chloride trihydroxide                            |                                                 |         |         |                      |           |
|---------------------------------------------------------------|-------------------------------------------------|---------|---------|----------------------|-----------|
| copper chloride hydroxide or copper chloride oxide hydrate    |                                                 |         |         |                      |           |
| 44.602                                                        |                                                 |         |         |                      |           |
| 1332-65-6 or 1332-40-7                                        |                                                 |         |         |                      |           |
| 215-572-9 or 603-724-0                                        |                                                 |         |         |                      |           |
| FAO specification AGP: CP/251 (1991)<br>(44.2Oxch/TC/S, 1989) |                                                 |         |         |                      |           |
| Total Cu content (min. % (w/w))                               | Max. heavy metals content (expressed in g/g Cu) |         |         |                      | Water (%) |
|                                                               | Lead                                            | Cadmium | Arsenic | Water copper soluble |           |
| 55.0                                                          | 0.0005                                          | 0.0001  | 0.0001  | 0.010                | 2.0       |

Minimum purity of the active substance as manufactured

Expressed as total copper content  
 Albaugh 571 g/kg Montanwerke 569 g/kg  
 Cinkarna 577 g/kg Prince Erachem 573 g/kg  
 IQV 575 g/kg Saldeco 581 g/kg  
 Isagro 570 g/kg Spiess-Urania 579 g/kg  
 Manica 577 g/kg

Identity of relevant impurities (of toxicological, ecotoxicological and/or environmental concern) in the active substance as manufactured

|                                                                 |                       |
|-----------------------------------------------------------------|-----------------------|
| Arsenic                                                         | max. 0.1 mg/g Cu      |
| Cadmium                                                         | max. 0.1 mg/g Cu      |
| Lead                                                            | max. 0.3 mg/g Cu      |
| Nickel                                                          | max. 1 mg/g Cu        |
| Cobalt                                                          | max. 3 mg/kg          |
| Mercury                                                         | max. 5 mg/kg          |
| Chromium                                                        | max. 100 mg/kg        |
| Antimony                                                        | max. 7 mg/kg          |
| [Cu <sub>2</sub> H <sub>3</sub> O <sub>3</sub> Cl] <sub>n</sub> |                       |
| 213.6 n                                                         | g/mol where n =1 or 2 |
| [Cu <sub>2</sub> Cl(OH) <sub>3</sub> ] <sub>n</sub>             |                       |

Molecular formula

Molar mass

Structural formula

**Bordeaux Mixture**

| Chemical name (IUPAC)                                                                                                                     | traditional mixture of copper(II) sulfate and calcium hydroxide                                                                                                                                                                                                                                                                                                                                                                                                           |                                 |                                                 |         |                  |      |                  |        |                |         |              |         |              |          |                |          |              |
|-------------------------------------------------------------------------------------------------------------------------------------------|---------------------------------------------------------------------------------------------------------------------------------------------------------------------------------------------------------------------------------------------------------------------------------------------------------------------------------------------------------------------------------------------------------------------------------------------------------------------------|---------------------------------|-------------------------------------------------|---------|------------------|------|------------------|--------|----------------|---------|--------------|---------|--------------|----------|----------------|----------|--------------|
| Chemical name (CA)                                                                                                                        | Bordeaux mixture                                                                                                                                                                                                                                                                                                                                                                                                                                                          |                                 |                                                 |         |                  |      |                  |        |                |         |              |         |              |          |                |          |              |
| CIPAC No                                                                                                                                  | 44.604                                                                                                                                                                                                                                                                                                                                                                                                                                                                    |                                 |                                                 |         |                  |      |                  |        |                |         |              |         |              |          |                |          |              |
| CAS No                                                                                                                                    | 8011-63-0                                                                                                                                                                                                                                                                                                                                                                                                                                                                 |                                 |                                                 |         |                  |      |                  |        |                |         |              |         |              |          |                |          |              |
| EC No (EINECS or ELINCS)                                                                                                                  | Not allocated                                                                                                                                                                                                                                                                                                                                                                                                                                                             |                                 |                                                 |         |                  |      |                  |        |                |         |              |         |              |          |                |          |              |
| FAO Specification (including year of publication)                                                                                         | No specification for Bordeaux mixture<br>FAO specification for copper sulfate AGP:CP/251 (1991) (44.2s/TC/S, 1989)                                                                                                                                                                                                                                                                                                                                                        |                                 |                                                 |         |                  |      |                  |        |                |         |              |         |              |          |                |          |              |
|                                                                                                                                           | <table border="1"> <thead> <tr> <th rowspan="2">Total Cu content (min. % (w/w))</th> <th colspan="3">Max. heavy metals content (expressed in g/g Cu)</th> <th rowspan="2"></th> <th rowspan="2"></th> </tr> <tr> <th>Lead</th> <th>Cadmium</th> <th>Arsenic</th> </tr> </thead> <tbody> <tr> <td>25.0</td> <td>0.0005</td> <td>0.0001</td> <td>0.0001</td> <td></td> <td></td> </tr> </tbody> </table>                                                                    | Total Cu content (min. % (w/w)) | Max. heavy metals content (expressed in g/g Cu) |         |                  |      |                  | Lead   | Cadmium        | Arsenic | 25.0         | 0.0005  | 0.0001       | 0.0001   |                |          |              |
| Total Cu content (min. % (w/w))                                                                                                           | Max. heavy metals content (expressed in g/g Cu)                                                                                                                                                                                                                                                                                                                                                                                                                           |                                 |                                                 |         |                  |      |                  |        |                |         |              |         |              |          |                |          |              |
|                                                                                                                                           | Lead                                                                                                                                                                                                                                                                                                                                                                                                                                                                      | Cadmium                         | Arsenic                                         |         |                  |      |                  |        |                |         |              |         |              |          |                |          |              |
| 25.0                                                                                                                                      | 0.0005                                                                                                                                                                                                                                                                                                                                                                                                                                                                    | 0.0001                          | 0.0001                                          |         |                  |      |                  |        |                |         |              |         |              |          |                |          |              |
| Minimum purity of the active substance as manufactured                                                                                    | Expressed as total copper content<br>IQV 263 g/kg Saldeco 276 g/kg<br>Isagro 263 g/kg UPL 257 g/kg<br>Manica 270 g/kg                                                                                                                                                                                                                                                                                                                                                     |                                 |                                                 |         |                  |      |                  |        |                |         |              |         |              |          |                |          |              |
| Identity of relevant impurities (of toxicological, ecotoxicological and/or environmental concern) in the active substance as manufactured | <table border="1"> <tbody> <tr> <td>Arsenic</td> <td>max. 0.1 mg/g Cu</td> </tr> <tr> <td>Cadmium</td> <td>max. 0.1 mg/g Cu</td> </tr> <tr> <td>Lead</td> <td>max. 0.3 mg/g Cu</td> </tr> <tr> <td>Nickel</td> <td>max. 1 mg/g Cu</td> </tr> <tr> <td>Cobalt</td> <td>max. 3 mg/kg</td> </tr> <tr> <td>Mercury</td> <td>max. 5 mg/kg</td> </tr> <tr> <td>Chromium</td> <td>max. 100 mg/kg</td> </tr> <tr> <td>Antimony</td> <td>max. 7 mg/kg</td> </tr> </tbody> </table> | Arsenic                         | max. 0.1 mg/g Cu                                | Cadmium | max. 0.1 mg/g Cu | Lead | max. 0.3 mg/g Cu | Nickel | max. 1 mg/g Cu | Cobalt  | max. 3 mg/kg | Mercury | max. 5 mg/kg | Chromium | max. 100 mg/kg | Antimony | max. 7 mg/kg |
| Arsenic                                                                                                                                   | max. 0.1 mg/g Cu                                                                                                                                                                                                                                                                                                                                                                                                                                                          |                                 |                                                 |         |                  |      |                  |        |                |         |              |         |              |          |                |          |              |
| Cadmium                                                                                                                                   | max. 0.1 mg/g Cu                                                                                                                                                                                                                                                                                                                                                                                                                                                          |                                 |                                                 |         |                  |      |                  |        |                |         |              |         |              |          |                |          |              |
| Lead                                                                                                                                      | max. 0.3 mg/g Cu                                                                                                                                                                                                                                                                                                                                                                                                                                                          |                                 |                                                 |         |                  |      |                  |        |                |         |              |         |              |          |                |          |              |
| Nickel                                                                                                                                    | max. 1 mg/g Cu                                                                                                                                                                                                                                                                                                                                                                                                                                                            |                                 |                                                 |         |                  |      |                  |        |                |         |              |         |              |          |                |          |              |
| Cobalt                                                                                                                                    | max. 3 mg/kg                                                                                                                                                                                                                                                                                                                                                                                                                                                              |                                 |                                                 |         |                  |      |                  |        |                |         |              |         |              |          |                |          |              |
| Mercury                                                                                                                                   | max. 5 mg/kg                                                                                                                                                                                                                                                                                                                                                                                                                                                              |                                 |                                                 |         |                  |      |                  |        |                |         |              |         |              |          |                |          |              |
| Chromium                                                                                                                                  | max. 100 mg/kg                                                                                                                                                                                                                                                                                                                                                                                                                                                            |                                 |                                                 |         |                  |      |                  |        |                |         |              |         |              |          |                |          |              |
| Antimony                                                                                                                                  | max. 7 mg/kg                                                                                                                                                                                                                                                                                                                                                                                                                                                              |                                 |                                                 |         |                  |      |                  |        |                |         |              |         |              |          |                |          |              |
| Molecular formula                                                                                                                         | $\text{Ca}_3\text{Cu}_4\text{H}_6\text{O}_{22}\text{S}_4\cdot n\text{H}_2\text{O}$                                                                                                                                                                                                                                                                                                                                                                                        |                                 |                                                 |         |                  |      |                  |        |                |         |              |         |              |          |                |          |              |
| Molar mass                                                                                                                                | $860 + 18n$ g/mol where $n = 1$ to $6$                                                                                                                                                                                                                                                                                                                                                                                                                                    |                                 |                                                 |         |                  |      |                  |        |                |         |              |         |              |          |                |          |              |
| Structural formula                                                                                                                        | $\text{Cu}_4(\text{OH})_6\text{SO}_4\cdot 3\text{CaSO}_4\cdot n\text{H}_2\text{O}$                                                                                                                                                                                                                                                                                                                                                                                        |                                 |                                                 |         |                  |      |                  |        |                |         |              |         |              |          |                |          |              |

**Tribasic copper sulfate**

|                                                        |                                                                                                                      |
|--------------------------------------------------------|----------------------------------------------------------------------------------------------------------------------|
| Chemical name (IUPAC)                                  | copper(II) hydroxide sulfate                                                                                         |
| Chemical name (CA)                                     | tribasic copper sulfate                                                                                              |
| CIPAC No                                               | 44.306                                                                                                               |
| CAS No                                                 | 12527-76-3 or 1333-22-8                                                                                              |
| EC No (EINECS or ELINCS)                               | 215-582-3                                                                                                            |
| FAO Specification (including year of publication)      | No FAO specification                                                                                                 |
| Minimum purity of the active substance as manufactured | Expressed as total copper content<br>Albaugh 518 g/kg Nufarm 543 g/kg (dry weight)<br>Cinkarna 540 g/kg UPL 490 g/kg |

Identity of relevant impurities (of toxicological, ecotoxicological and/or environmental concern) in the active substance as manufactured

Molecular formula

Molar mass

Structural formula

|                                                                       |                          |
|-----------------------------------------------------------------------|--------------------------|
| Manica                                                                | 530 g/kg                 |
| Arsenic                                                               | max. 0.1 mg/g Cu         |
| Cadmium                                                               | max. 0.1 mg/g Cu         |
| Lead                                                                  | max. 0.3 mg/g Cu         |
| Nickel                                                                | max. 1 mg/g Cu           |
| Cobalt                                                                | max. 3 mg/kg             |
| Mercury                                                               | max. 5 mg/kg             |
| Chromium                                                              | max. 100 mg/kg           |
| Antimony                                                              | max. 7 mg/kg             |
| Cu <sub>4</sub> H <sub>6</sub> O <sub>10</sub> S.nH <sub>2</sub> O    |                          |
| 452.3 + 18n                                                           | g/mol where n = 0 or 0.5 |
| Cu <sub>4</sub> (OH) <sub>6</sub> SO <sub>4</sub> . nH <sub>2</sub> O |                          |

### Copper (I) oxide

Chemical name (IUPAC)

Chemical name (CA)

CIPAC No

CAS No

EC No (EINECS or ELINCS)

FAO Specification (including year of publication)

|                                                         |                                                    |        |        |                            |                    |            |              |
|---------------------------------------------------------|----------------------------------------------------|--------|--------|----------------------------|--------------------|------------|--------------|
| copper(I) oxide or cuprous oxide                        |                                                    |        |        |                            |                    |            |              |
| Cuprous oxide                                           |                                                    |        |        |                            |                    |            |              |
| 44.603                                                  |                                                    |        |        |                            |                    |            |              |
| 1317-39-1                                               |                                                    |        |        |                            |                    |            |              |
| 215-270-7                                               |                                                    |        |        |                            |                    |            |              |
| FAO specification AGP:CP/251 (1991) (44.Iox/TC/S, 1989) |                                                    |        |        |                            |                    |            |              |
| Total<br>Cu<br>min %<br>(w/w)                           | Max. heavy metals content<br>(expressed in g/g Cu) |        |        |                            |                    | CuO<br>(%) | Water<br>(%) |
|                                                         | Pb                                                 | Cd     | As     | Water<br>copper<br>soluble | Metallic<br>copper |            |              |
| 82.0                                                    | 0.0005                                             | 0.0001 | 0.0001 | 0.025                      | 0.05               | 0.10       | 1.5          |
| Expressed as total copper content                       |                                                    |        |        |                            |                    |            |              |
| 858 g/kg                                                |                                                    |        |        |                            |                    |            |              |
| Arsenic                                                 | max. 0.1 mg/g Cu                                   |        |        |                            |                    |            |              |
| Cadmium                                                 | max. 0.1 mg/g Cu                                   |        |        |                            |                    |            |              |
| Lead                                                    | max. 0.3 mg/g Cu                                   |        |        |                            |                    |            |              |
| Nickel                                                  | max. 1 mg/g Cu                                     |        |        |                            |                    |            |              |
| Cobalt                                                  | max. 3 mg/kg                                       |        |        |                            |                    |            |              |
| Mercury                                                 | max. 5 mg/kg                                       |        |        |                            |                    |            |              |
| Chromium                                                | max. 100 mg/kg                                     |        |        |                            |                    |            |              |
| Antimony                                                | max. 7 mg/kg                                       |        |        |                            |                    |            |              |
| Cu <sub>2</sub> O                                       |                                                    |        |        |                            |                    |            |              |
| 143.14                                                  | g/mol                                              |        |        |                            |                    |            |              |
| Cu <sub>2</sub> O                                       |                                                    |        |        |                            |                    |            |              |

Minimum purity of the active substance as manufactured

Identity of relevant impurities (of toxicological, ecotoxicological and/or environmental concern) in the active substance as manufactured

Molecular formula

Molar mass

Structural formula

**Physical and chemical properties (Regulation (EU) N° 283/2013, Annex Part A, point 2)**

|                                             |                         |                                                                                                                          |
|---------------------------------------------|-------------------------|--------------------------------------------------------------------------------------------------------------------------|
| Melting point (state purity)                | Copper hydroxide        | Decomposes before melting (60.1% Cu)                                                                                     |
|                                             | Copper oxychloride      | Decomposes before melting (57.39% Cu)                                                                                    |
|                                             | Bordeaux mixture        | Greater than 400 °C (not measured above) (26.70% Cu)                                                                     |
|                                             | Tribasic copper sulfate | Greater than 360 °C (not measured above) (54.2% Cu)                                                                      |
|                                             | Copper(I) oxide         | Greater than 400 °C (not measured above) (97%)                                                                           |
| Boiling point (state purity)                | Copper hydroxide        | Decomposes before boiling (60.1% Cu)                                                                                     |
|                                             | Copper oxychloride      | Decomposes before boiling (57.39% Cu)                                                                                    |
|                                             | Bordeaux mixture        | Greater than 400 °C (not measured above) (26.70% Cu)                                                                     |
|                                             | Tribasic copper sulfate | Greater than 360 °C (not measured above) (54.2%)                                                                         |
|                                             | Copper(I) oxide         | Greater than 400 °C (not measured above) (97%)                                                                           |
| Temperature of decomposition (state purity) | Copper hydroxide        | Decomposes at 229 °C (60.1% Cu)                                                                                          |
|                                             | Copper oxychloride      | Decomposes from approximately 240 °C (57.39% Cu)                                                                         |
|                                             | Bordeaux mixture        | Greater than 400 °C (not measured above) (26.70% Cu)                                                                     |
|                                             | Tribasic copper sulfate | Greater than 360 °C (not measured above) (54.2% Cu)                                                                      |
|                                             | Copper(I) oxide         | Sometimes an exothermic event occurred, corresponding to the oxidation from copper (I) to copper (II), at least at 332°C |
| Appearance (state purity)                   | Copper hydroxide        | Blue powder (60.1% Cu)                                                                                                   |
|                                             | Copper oxychloride      | Light green, very fine, non-free flowing powder (57.39% Cu)                                                              |
|                                             | Bordeaux mixture        | Light green, very fine, not free-flowing powder (26.70% Cu)                                                              |
|                                             | Tribasic copper sulfate | Lumpy blueish-green powder (54.2% Cu)                                                                                    |
|                                             | Copper(I) oxide         | Opaque, orange, fine and easily compactable powder (97%)                                                                 |

|                                                                  |                                                                   |                                                                                                                                 |
|------------------------------------------------------------------|-------------------------------------------------------------------|---------------------------------------------------------------------------------------------------------------------------------|
| Vapour pressure (state temperature, state purity)                | Not applicable as expected to be negligible (all copper variants) |                                                                                                                                 |
| Henry's law constant (state temperature)                         | Not applicable as expected to be negligible (all copper variants) |                                                                                                                                 |
| Solubility in water (state temperature, state purity and pH)     | Copper hydroxide                                                  | At 20 °C (60.1% Cu)<br>0.506 mg/L at pH 6.4-6.6<br>39.8 g/L at pH 4-6<br>0.25 mg/L at pH 10                                     |
|                                                                  | Copper oxychloride                                                | At 20 °C (57.39% Cu)<br>1.19 mg/L at pH 6.5-6.6<br>101 g/L at pH 3.1<br>0.525 mg/L at pH 10.1                                   |
|                                                                  | Bordeaux mixture                                                  | At 20°C (26.70% Cu)<br>2.20*10 <sup>-3</sup> g/L at pH 6.8<br>129 g/L at pH 2.9<br>1.10*10 <sup>-3</sup> g/L at pH 9.8          |
|                                                                  | Tribasic copper sulfate                                           | At 20 °C (54.2% Cu)<br>< 3.42*10 <sup>-3</sup> g/L at neutral pH<br>0.5 g/L at pH 4-6<br>< 2.55*10 <sup>-4</sup> g/L at pH 10.1 |
|                                                                  | Copper(I) oxide                                                   | At 20°C (Purity: 97%)<br>6.39*10 <sup>-4</sup> g/L at pH 6.8<br>28.6 g/L at pH 2.9<br>5.39*10 <sup>-4</sup> g/L at pH 9.8       |
| Solubility in organic solvents (state temperature, state purity) | <b>Copper oxychloride</b>                                         |                                                                                                                                 |
|                                                                  | Organic solvent                                                   | Solubility at 20°C (g/L)<br>(Purity: 57.39% Cu)                                                                                 |
|                                                                  | toluene                                                           | <1.1*10 <sup>-2</sup>                                                                                                           |
|                                                                  | dichloromethane                                                   | <1.0*10 <sup>-2</sup>                                                                                                           |
|                                                                  | hexane                                                            | <9.8*10 <sup>-3</sup>                                                                                                           |
|                                                                  | ethyl acetate                                                     | <1.1*10 <sup>-2</sup>                                                                                                           |
|                                                                  | methanol                                                          | <8.2*10 <sup>-3</sup>                                                                                                           |
|                                                                  | acetone                                                           | <8.4*10 <sup>-3</sup>                                                                                                           |
|                                                                  | <b>Copper hydroxide</b>                                           |                                                                                                                                 |
|                                                                  | Organic solvent                                                   | Solubility at 30°C<br>(copper concentration<br>ppb) (Purity: 60.1% Cu)                                                          |
| heptane                                                          | 7.01                                                              |                                                                                                                                 |
| xylene                                                           | 15.7                                                              |                                                                                                                                 |
| 1,2-dichloroethane                                               | 61.0                                                              |                                                                                                                                 |
| isopropyl alcohol                                                | 1.64                                                              |                                                                                                                                 |
| acetone                                                          | 5.0                                                               |                                                                                                                                 |
| ethyl acetate                                                    | 2.57                                                              |                                                                                                                                 |
| <b>Tribasic copper sulfate</b>                                   |                                                                   |                                                                                                                                 |
| Organic solvent                                                  | Solubility at 20°C (g/L)<br>(Purity: 54.2% Cu)                    |                                                                                                                                 |
| heptane                                                          | <0.1                                                              |                                                                                                                                 |
| <i>p</i> -xylene                                                 | <0.1                                                              |                                                                                                                                 |
| 1,2-dichloroethane                                               | <0.1                                                              |                                                                                                                                 |
| 1-octanol                                                        | <0.1                                                              |                                                                                                                                 |
| acetone                                                          | <0.1                                                              |                                                                                                                                 |
| ethyl-acetate                                                    | <0.1                                                              |                                                                                                                                 |

Surface tension  
(state concentration and temperature, state purity)

| Bordeaux mixture                                                                                                                                          |                                                        |              |                |
|-----------------------------------------------------------------------------------------------------------------------------------------------------------|--------------------------------------------------------|--------------|----------------|
| Organic solvent                                                                                                                                           | Solubility at 20°C (g/L)<br>(Purity: 26.70% Cu)        |              |                |
| toluene                                                                                                                                                   | <9.6*10 <sup>-3</sup>                                  |              |                |
| dichloromethane                                                                                                                                           | <8.8*10 <sup>-3</sup>                                  |              |                |
| hexane                                                                                                                                                    | <9.8*10 <sup>-3</sup>                                  |              |                |
| ethyl acetate                                                                                                                                             | <8.4*10 <sup>-3</sup>                                  |              |                |
| methanol                                                                                                                                                  | <9.0*10 <sup>-3</sup>                                  |              |                |
| acetone                                                                                                                                                   | <8.8*10 <sup>-3</sup>                                  |              |                |
| Copper (I) oxide                                                                                                                                          |                                                        |              |                |
| Organic solvent                                                                                                                                           | Solubility at 20°C (g/L)<br>(Purity: 97%)              |              |                |
| toluene                                                                                                                                                   | <1.4*10 <sup>-2</sup>                                  |              |                |
| dichloromethane                                                                                                                                           | <1*10 <sup>-2</sup>                                    |              |                |
| hexane                                                                                                                                                    | <1.2*10 <sup>-2</sup>                                  |              |                |
| ethyl acetate                                                                                                                                             | <1.2*10 <sup>-2</sup>                                  |              |                |
| methanol                                                                                                                                                  | <9.8*10 <sup>-3</sup>                                  |              |                |
| acetone                                                                                                                                                   | <1.3*10 <sup>-2</sup>                                  |              |                |
| Copper hydroxide                                                                                                                                          | Not applicable (solubility is too low)                 |              |                |
| Copper oxychloride                                                                                                                                        | 72.2 mN/m (1.10*10 <sup>-3</sup> g/L, 20°C, 57.39% Cu) |              |                |
| Bordeaux mixture                                                                                                                                          | 68.9 mN/m (1.43*10 <sup>-3</sup> g/L, 20°C, 26.7% Cu)  |              |                |
| Tribasic copper sulfate                                                                                                                                   | 72.2 mN/m (2.90*10 <sup>-3</sup> g/L, 20°C, 54.2% Cu)  |              |                |
| Copper(I) oxide                                                                                                                                           | Not applicable (solubility is too low)                 |              |                |
| Not applicable for all copper variants. Calculated to be 2.78 as the ratio between solubility in n-octanol over solubility in water for copper hydroxide. |                                                        |              |                |
| Not appropriate                                                                                                                                           |                                                        |              |                |
| Copper oxychloride                                                                                                                                        |                                                        |              |                |
| $\lambda_{max}$                                                                                                                                           | $\epsilon$ molar absorption coefficient (L/mol/cm)     |              |                |
| (purity: 57.9% Cu)                                                                                                                                        | Neutral (pH ≈6)                                        | Acid (pH <2) | Basic (pH >10) |
| 205                                                                                                                                                       | Not applicable                                         | 2850         | Not applicable |
| 250                                                                                                                                                       | Not applicable                                         | 1461         | Not applicable |
| 800                                                                                                                                                       | Not applicable                                         | 38           | Not applicable |
| 290                                                                                                                                                       | Not applicable                                         | 260          | Not applicable |
| 295                                                                                                                                                       | Not applicable                                         | 195          | Not applicable |

Partition coefficient  
(state temperature, pH and purity)

Dissociation constant (state purity)

UV/VIS absorption (max.) incl.  $\epsilon$   
(state purity, pH)

| Copper hydroxide   |                                                    |              |                |
|--------------------|----------------------------------------------------|--------------|----------------|
| $\lambda_{\max}$   | $\epsilon$ molar absorption coefficient (L/mol/cm) |              |                |
| (purity: 60.1% Cu) | Neutral (pH $\approx$ 6)                           | Acid (pH <2) | Basic (pH >10) |
| 205                | Not applicable                                     | 3605         | Not applicable |
| 250                | Not applicable                                     | 185          | Not applicable |
| 800                | Not applicable                                     | 13           | Not applicable |
| 290                | Not applicable                                     | 32           | Not applicable |
| 295                | Not applicable                                     | 24           | Not applicable |

**Tribasic copper sulfate**

Due to low solubility at basic and neutral pH, spectrum is obtained in acidic solutions only (pH @20°C =1.92-1.95).

Two absorbance maxima:  
 -798 nm;  $\epsilon = 47.8 \text{ L}\cdot\text{mol}^{-1}\cdot\text{cm}^{-1}$   
 -<200 nm;  $\epsilon = 7093 \text{ L}\cdot\text{mol}^{-1}\cdot\text{cm}^{-1}$

In fact, tribasic copper sulfate is not stable in acidic solution. The spectrum obtained is the spectrum of copper sulfate.

| Bordeaux mixture    |                                                    |              |                |
|---------------------|----------------------------------------------------|--------------|----------------|
| $\lambda_{\max}$    | $\epsilon$ molar absorption coefficient (L/mol/cm) |              |                |
| (purity: 26.7 % Cu) | Neutral (pH $\approx$ 6)                           | Acid (pH <2) | Basic (pH >10) |
| 205                 | Not applicable                                     | 5923         | Not applicable |
| 250                 | Not applicable                                     | 3119         | Not applicable |
| 800                 | Not applicable                                     | 70           | Not applicable |
| 290                 | Not applicable                                     | 520          | Not applicable |
| 295                 | Not applicable                                     | 398          | Not applicable |

| Copper(I) oxide  |                                                    |              |                |
|------------------|----------------------------------------------------|--------------|----------------|
| $\lambda_{\max}$ | $\epsilon$ molar absorption coefficient (L/mol/cm) |              |                |
| (Purity: >99%)   | Neutral (pH $\approx$ 6)                           | Acid (pH <2) | Basic (pH >10) |
| 205              | Not applicable                                     | 2978         | Not applicable |
| 250              | Not applicable                                     | 1425         | Not applicable |
| 800              | Not applicable                                     | 40           | Not applicable |
| 290*             | Not applicable                                     | 265          | Not applicable |
| 295*             | Not applicable                                     | 198          | Not applicable |

Flammability (state purity)

Theoretical assessment for copper hydroxide, copper oxychloride, tribasic copper sulfate, copper(I) oxide, and Bordeaux mixture.  
 Not highly flammable

Explosive properties (state purity)

Theoretical assessment for copper hydroxide, copper oxychloride, tribasic copper sulfate, copper(I) oxide, and Bordeaux mixture  
 Not explosive



Oxidising properties (state purity)

Theoretical assessment for copper hydroxide, copper oxychloride, tribasic copper sulfate, copper(I) oxide, and Bordeaux mixture  
Not oxidising

**Summary of representative uses evaluated, for which all risk assessments needed to be completed (name of active substance or the respective variant)  
(Regulation (EU) N° 284/2013, Annex Part A, points 3, 4)**

| Crop and/or situation (a) | Member State | Product Name | F G I (b) | Pests or group of pests controlled (c)                                            | Formulation |                       | Application                          |                             |                                                        |                                     | Application rate per treatment |                    |                                                                            | PHI (days) (l)     | Remarks (m)                                                                                                                          |
|---------------------------|--------------|--------------|-----------|-----------------------------------------------------------------------------------|-------------|-----------------------|--------------------------------------|-----------------------------|--------------------------------------------------------|-------------------------------------|--------------------------------|--------------------|----------------------------------------------------------------------------|--------------------|--------------------------------------------------------------------------------------------------------------------------------------|
|                           |              |              |           |                                                                                   | Type (d-f)  | Conc of a.i. g/kg (i) | Method kind (f-h)                    | Growth stage and season (j) | Number min max (k)<br>a) per use<br>b) per crop/season | Interval between applications (min) | Kg a.i./hl min max (g/hl)      | Water l/ha min max | kg a.i./ha<br>a) max. rate per appl.<br>b) max. total rate per crop/season |                    |                                                                                                                                      |
| Grape                     | C/S          | Funguran-OH  | F         | <i>Bacterial necrosis Elsinoë ampelina</i>                                        | WP          | 500                   | Airblast sprayer                     | BBCH 91 - 11                | a) 3<br>b) 3                                           | 21 days                             | n.a.                           | 400-1000           | a) 1.25<br>b) 3.75                                                         | 90                 |                                                                                                                                      |
| Grape                     | C/S          | Funguran-OH  | F         | <i>Plasmopara viticola, Elsinoë ampelina</i>                                      | WP          | 500                   | Airblast sprayer<br>Knapsack Sprayer | BBCH 12 - 89                | a) 8<br>b) 8                                           | 7 days                              | n.a.                           | 100-1200           | a) 1.25<br>b) 6.0                                                          | 21                 | Annual application must not exceed 5 kg/ha during the bird breeding season                                                           |
| Tomato                    | C/S          | Funguran-OH  | F         | <i>Phytophthora spp Alternaria, Colletotrichum, Pseudomonas, Xanthomonas</i>      | WP          | 500                   | Foliar spray                         | BBCH 12 - 89                | a) 8<br>b) 8                                           | 7 days                              | n.a.                           | 200-1000           | a) 0.85<br>b) 6.0                                                          | 3                  | Annual application must not exceed 5 kg/ha during the bird breeding season<br>RMS remarks: No Northern trials were available.        |
| Tomato                    | C/S          | Funguran-OH  | G         | <i>Phytophthora spp Alternaria, Colletotrichum, Pseudomonas, Xanthomonas</i>      | WP          | 500                   | Foliar spray                         | BBCH 12 - 89                | a) 8<br>b) 8                                           | 7 days                              | n.a.                           | 200-1000           | a) 1.25<br>b) 6.0                                                          | 3                  | Annual application must not exceed 5 kg/ha during the bird breeding season                                                           |
| Cucurbits                 | C/S          | Funguran-OH  | F         | <i>Peronospora cubensis; Alternaria spp Colletotrichum spp Bacterial diseases</i> | WP          | 500                   | Foliar spray                         | BBCH 10 - 89                | a) 8<br>b) 8                                           | 7 days                              | n.a.                           | 200-1500           | a) 0.85<br>b) 6.0                                                          | See Column Remarks | Annual application must not exceed 5 kg/ha during the bird breeding season<br>PHI: 3 d (Cucumber, zucchini), 7 d (Melon, watermelon) |
| Cucurbits                 | C/S          | Funguran-OH  | G         | <i>Peronospora cubensis; Alternaria spp Colletotrichum spp Bacterial diseases</i> | WP          | 500                   | Foliar spray                         | BBCH 10 - 89                | a) 8<br>b) 8                                           | 7 days                              | n.a.                           | 200-1500           | a) 1.25<br>b) 6.0                                                          | See Column Remarks | Annual application must not exceed 5 kg/ha during the bird breeding season<br>PHI: 3 d (Cucumber, zucchini), 7 d (Melon, watermelon) |
| Grape                     | C/S          | Funguran-OH  | F         | <i>Plasmopara viticola,</i>                                                       | WP          | 500                   | Airblast sprayer                     | BBCH 12 - 89                | a) 8                                                   | 7 days                              | n.a.                           | 100-1200           | a) 1.25                                                                    | 21                 | Flexible dosing regimen<br>Total applied must not                                                                                    |

|  |  |  |  |                         |  |  |  |  |      |  |  |  |                       |  |                                                                                                                                                            |
|--|--|--|--|-------------------------|--|--|--|--|------|--|--|--|-----------------------|--|------------------------------------------------------------------------------------------------------------------------------------------------------------|
|  |  |  |  | <i>Elsinoë ampelina</i> |  |  |  |  | b) 8 |  |  |  | b) See Column Remarks |  | exceed 30 kg/ha in any rolling 5 year period and 8 kg/ha/yr in any single year. Annual application must not exceed 5 kg/ha during the bird breeding season |
|--|--|--|--|-------------------------|--|--|--|--|------|--|--|--|-----------------------|--|------------------------------------------------------------------------------------------------------------------------------------------------------------|

\* For uses where the column „Remarks“ in marked in grey further consideration is necessary. Uses should be crossed out when the notifier no longer supports this use(s).

- (a) For crops, the EU and Codex classification (both) should be taken into account ; where relevant, the use situation should be described (e.g. fumigation of a structure)
- (b) Outdoor or field use (F), greenhouse application (G) or indoor application (I)
- (c) e.g. biting and suckling insects, soil born insects, foliar fungi, weeds
- (d) e.g. wettable powder (WP), emulsifiable concentrate (EC), granule (GR)
- (e) GCPF Codes – GIFAP Technical Monograph N° 2, 1989
- (f) All abbreviations used must be explained
- (g) Method, e.g. high volume spraying, low volume spraying, spreading, dusting, drench
- (h) Kind, e.g. overall, broadcast, aerial spraying, row, individual plant, between the plant – type of equipment used must be indicated

(i) g/kg or g/L. Normally the rate should be given for the active substance (according to ISO) and not for the variant in order to compare the rate for same active substances used in different variants (e.g. fluoroxypr). In certain cases, where only one variant synthesised, it is more appropriate to give the rate for the variant (e.g. bentiavalicarb-isopropyl).

(j) Growth stage at last treatment (BBCH Monograph, Growth Stages of Plants, 1997, Blackwell, ISBN 3-8263-3152-4), including where relevant, information on season at time of application

(k) Indicate the minimum and maximum number of application possible under practical conditions of use

(l) The values should be given in g or kg whatever gives the more manageable number (e.g. 200 kg/ha instead of 200 000 g/ha or 12.5 g/ha instead of 0.0125 kg/ha)

(m) PHI - minimum pre-harvest interval

| Crop and/or situation (a) | Member State | Product Name | F G I (b) | Pests or group of pests controlled (c)                                            | Formulation |                       | Application                          |                             |                                                        |                                     | Application rate per treatment |                    |                                                                            | PHI (days) (l)     | Remarks (m)                                                                                                                          |
|---------------------------|--------------|--------------|-----------|-----------------------------------------------------------------------------------|-------------|-----------------------|--------------------------------------|-----------------------------|--------------------------------------------------------|-------------------------------------|--------------------------------|--------------------|----------------------------------------------------------------------------|--------------------|--------------------------------------------------------------------------------------------------------------------------------------|
|                           |              |              |           |                                                                                   | Type (d-f)  | Conc of a.i. g/kg (i) | Method kind (f-h)                    | Growth stage and season (j) | Number min max (k)<br>a) per use<br>b) per crop/season | Interval between applications (min) | Kg a.i./hl min max (g/hl)      | Water l/ha min max | kg a.i./ha<br>a) max. rate per appl.<br>b) max. total rate per crop/season |                    |                                                                                                                                      |
| Grape                     | C/S          | Curenox 50   | F         | <i>Bacterial necrosis Elsinoë ampelina</i>                                        | WG          | 500                   | Airblast sprayer                     | BBCH 91 - 11                | a) 3<br>b) 3                                           | 21 days                             | n.a.                           | 400-1000           | a) 1.25<br>b) 3.75                                                         | 90                 |                                                                                                                                      |
| Grape                     | C/S          | Curenox 50   | F         | <i>Plasmopara viticola, Elsinoë ampelina</i>                                      | WG          | 500                   | Airblast sprayer<br>Knapsack Sprayer | BBCH 12 - 89                | a) 8<br>b) 8                                           | 7 days                              | n.a.                           | 100-1200           | a) 1.25<br>b) 6.0                                                          | 21                 | Annual application must not exceed 5 kg/ha during the bird breeding season                                                           |
| Tomato                    | C/S          | Curenox 50   | F         | <i>Phytophthora spp Alternaria, Colletotrichum, Pseudomonas, Xanthomonas</i>      | WG          | 500                   | Foliar spray                         | BBCH 12 - 89                | a) 8<br>b) 8                                           | 7 days                              | n.a.                           | 200-1000           | a) 0.85<br>b) 6.0                                                          | 3                  | Annual application must not exceed 5 kg/ha during the bird breeding season<br>RMS remarks: No Northern trials were available.        |
| Tomato                    | C/S          | Curenox 50   | G         | <i>Phytophthora spp Alternaria, Colletotrichum, Pseudomonas, Xanthomonas</i>      | WG          | 500                   | Foliar spray                         | BBCH 12 - 89                | a) 8<br>b) 8                                           | 7 days                              | n.a.                           | 200-1000           | a) 1.25<br>b) 6.0                                                          | 3                  | Annual application must not exceed 5 kg/ha during the bird breeding season                                                           |
| Cucurbits                 | C/S          | Curenox 50   | F         | <i>Peronospora cubensis; Alternaria spp Colletotrichum spp Bacterial diseases</i> | WG          | 500                   | Foliar spray                         | BBCH 10 - 89                | a) 8<br>b) 8                                           | 7 days                              | n.a.                           | 200-1500           | a) 0.85<br>b) 6.0                                                          | See Column Remarks | Annual application must not exceed 5 kg/ha during the bird breeding season<br>PHI: 3 d (Cucumber, zucchini), 7 d (Melon, watermelon) |
| Cucurbits                 | C/S          | Curenox 50   | G         | <i>Peronospora cubensis; Alternaria spp Colletotrichum spp Bacterial diseases</i> | WG          | 500                   | Foliar spray                         | BBCH 10 - 89                | a) 8<br>b) 8                                           | 7 days                              | n.a.                           | 200-1500           | a) 1.25<br>b) 6.0                                                          | See Column Remarks | Annual application must not exceed 5 kg/ha during the bird breeding season<br>PHI: 3 d (Cucumber, zucchini), 7 d (Melon, watermelon) |
| Grape                     | C/S          | Curenox 50   | F         | <i>Plasmopara viticola, Elsinoë ampelina</i>                                      | WG          | 500                   | Airblast sprayer                     | BBCH 12 - 89                | a) 8<br>b) 8                                           | 7 days                              | n.a.                           | 100-1200           | a) 1.25<br>b) See Column Remarks                                           | 21                 | Flexible dosing regimen<br>Total applied must not exceed 30 kg/ha in any rolling 5 year period and 8 kg/ha/yr in any single year.    |

|  |  |  |  |  |  |  |  |  |  |  |  |  |  |  |  |  |  |  |                                                                            |
|--|--|--|--|--|--|--|--|--|--|--|--|--|--|--|--|--|--|--|----------------------------------------------------------------------------|
|  |  |  |  |  |  |  |  |  |  |  |  |  |  |  |  |  |  |  | Annual application must not exceed 5 kg/ha during the bird breeding season |
|--|--|--|--|--|--|--|--|--|--|--|--|--|--|--|--|--|--|--|----------------------------------------------------------------------------|

\* For uses where the column „Remarks“ in marked in grey further consideration is necessary. Uses should be crossed out when the notifier no longer supports this use(s).

- |                                                                                                                                                                                                                                                                                                                                                                                                                                                                                                                                                                                                                                                                                                                                                                                                                                                                           |                                                                                                                                                                                                                                                                                                                                                                                                                                                                                                                                                                                                                                                                                                                                                                                                                                                                                                                                                                                   |
|---------------------------------------------------------------------------------------------------------------------------------------------------------------------------------------------------------------------------------------------------------------------------------------------------------------------------------------------------------------------------------------------------------------------------------------------------------------------------------------------------------------------------------------------------------------------------------------------------------------------------------------------------------------------------------------------------------------------------------------------------------------------------------------------------------------------------------------------------------------------------|-----------------------------------------------------------------------------------------------------------------------------------------------------------------------------------------------------------------------------------------------------------------------------------------------------------------------------------------------------------------------------------------------------------------------------------------------------------------------------------------------------------------------------------------------------------------------------------------------------------------------------------------------------------------------------------------------------------------------------------------------------------------------------------------------------------------------------------------------------------------------------------------------------------------------------------------------------------------------------------|
| <ul style="list-style-type: none"> <li>(a) For crops, the EU and Codex classification (both) should be taken into account ; where relevant, the use situation should be described (e.g. fumigation of a structure)</li> <li>(b) Outdoor or field use (F), greenhouse application (G) or indoor application (I)</li> <li>(c) e.g. biting and suckling insects, soil born insects, foliar fungi, weeds</li> <li>(d) e.g. wettable powder (WP), emulsifiable concentrate (EC), granule (GR)</li> <li>(e) GCPF Codes – GIFAP Technical Monograph N° 2, 1989</li> <li>(f) All abbreviations used must be explained</li> <li>(g) Method, e.g. high volume spraying, low volume spraying, spreading, dusting, drench</li> <li>(h) Kind, e.g. overall, broadcast, aerial spraying, row, individual plant, between the plant – type of equipment used must be indicated</li> </ul> | <ul style="list-style-type: none"> <li>(i) g/kg or g/L. Normally the rate should be given for the active substance (according to ISO) and not for the variant in order to compare the rate for same active substances used in different variants (e.g. fluoroxypr). In certain cases, where only one variant synthesised, it is more appropriate to give the rate for the variant (e.g. bentiavalicarb-isopropyl).</li> <li>(j) <u>Growth stage at last treatment (BBCH Monograph, Growth Stages of Plants, 1997, Blackwell, ISBN 3-8263-3152-4), including where relevant, information on season at time of application</u></li> <li>(k) Indicate the minimum and maximum number of application possible under practical conditions of use</li> <li>(l) The values should be given in g or kg whatever gives the more manageable number (e.g. 200 kg/ha instead of 200 000 g/ha or 12.5 g/ha instead of 0.0125 kg/ha)</li> <li>(m) PHI - minimum pre-harvest interval</li> </ul> |
|---------------------------------------------------------------------------------------------------------------------------------------------------------------------------------------------------------------------------------------------------------------------------------------------------------------------------------------------------------------------------------------------------------------------------------------------------------------------------------------------------------------------------------------------------------------------------------------------------------------------------------------------------------------------------------------------------------------------------------------------------------------------------------------------------------------------------------------------------------------------------|-----------------------------------------------------------------------------------------------------------------------------------------------------------------------------------------------------------------------------------------------------------------------------------------------------------------------------------------------------------------------------------------------------------------------------------------------------------------------------------------------------------------------------------------------------------------------------------------------------------------------------------------------------------------------------------------------------------------------------------------------------------------------------------------------------------------------------------------------------------------------------------------------------------------------------------------------------------------------------------|

| Crop and/or situation (a) | Member State | Product Name                | F G I (b) | Pests or group of pests controlled (c)                                            | Formulation |                       | Application                       |                             |                                                        |                                     | Application rate per treatment |                    |                                                                            | PHI (days) (l)     | Remarks (m)                                                                                                                          |
|---------------------------|--------------|-----------------------------|-----------|-----------------------------------------------------------------------------------|-------------|-----------------------|-----------------------------------|-----------------------------|--------------------------------------------------------|-------------------------------------|--------------------------------|--------------------|----------------------------------------------------------------------------|--------------------|--------------------------------------------------------------------------------------------------------------------------------------|
|                           |              |                             |           |                                                                                   | Type (d-f)  | Conc of a.i. g/kg (i) | Method kind (f-h)                 | Growth stage and season (j) | Number min max (k)<br>a) per use<br>b) per crop/season | Interval between applications (min) | Kg a.i./hl min max (g/hl)      | Water l/ha min max | kg a.i./ha<br>a) max. rate per appl.<br>b) max. total rate per crop/season |                    |                                                                                                                                      |
| Grape                     | C/S          | Poltiglia Caffaro 20 DF New | F         | <i>Bacterial necrosis Elsinoë ampelina</i>                                        | WG          | 200                   | Airblast sprayer                  | BBCH 91 - 11                | a) 3<br>b) 3                                           | 21 days                             | n.a.                           | 400-1000           | a) 1.25<br>b) 3.75                                                         | 90                 |                                                                                                                                      |
| Grape                     | C/S          | Poltiglia Caffaro 20 DF New | F         | <i>Plasmopara viticola, Elsinoë ampelina</i>                                      | WG          | 200                   | Airblast sprayer Knapsack Sprayer | BBCH 12 - 89                | a) 8<br>b) 8                                           | 7 days                              | n.a.                           | 100-1200           | a) 1.25<br>b) 6.0                                                          | 21                 | Annual application must not exceed 5 kg/ha during the bird breeding season                                                           |
| Tomato                    | C/S          | Poltiglia Caffaro 20 DF New | F         | <i>Phytophthora spp Alternaria, Colletotrichum, Pseudomonas, Xanthomonas</i>      | WG          | 200                   | Foliar spray                      | BBCH 12 - 89                | a) 8<br>b) 8                                           | 7 days                              | n.a.                           | 200-1000           | a) 0.85<br>b) 6.0                                                          | 3                  | Annual application must not exceed 5 kg/ha during the bird breeding season<br>RMS remarks: No Northern trials were available.        |
| Tomato                    | C/S          | Poltiglia Caffaro 20 DF New | G         | <i>Phytophthora spp Alternaria, Colletotrichum, Pseudomonas, Xanthomonas</i>      | WG          | 200                   | Foliar spray                      | BBCH 12 - 89                | a) 8<br>b) 8                                           | 7 days                              | n.a.                           | 200-1000           | a) 1.25<br>b) 6.0                                                          | 3                  | Annual application must not exceed 5 kg/ha during the bird breeding season                                                           |
| Cucurbits                 | C/S          | Poltiglia Caffaro 20 DF New | F         | <i>Peronospora cubensis; Alternaria spp Colletotrichum spp Bacterial diseases</i> | WG          | 200                   | Foliar spray                      | BBCH 10 - 89                | a) 8<br>b) 8                                           | 7 days                              | n.a.                           | 200-1500           | a) 0.85<br>b) 6.0                                                          | See Column Remarks | Annual application must not exceed 5 kg/ha during the bird breeding season<br>PHI: 3 d (Cucumber, zucchini), 7 d (Melon, watermelon) |
| Cucurbits                 | C/S          | Poltiglia Caffaro 20 DF New | G         | <i>Peronospora cubensis; Alternaria spp Colletotrichum spp Bacterial diseases</i> | WG          | 200                   | Foliar spray                      | BBCH 10 - 89                | a) 8<br>b) 8                                           | 7 days                              | n.a.                           | 200-1500           | a) 1.25<br>b) 6.0                                                          | See Column Remarks | Annual application must not exceed 5 kg/ha during the bird breeding season<br>PHI: 3 d (Cucumber, zucchini), 7 d (Melon, watermelon) |
| Grape                     | C/S          | Poltiglia Caffaro 20 DF New | F         | <i>Plasmopara viticola, Elsinoë ampelina</i>                                      | WG          | 200                   | Airblast sprayer                  | BBCH 12 - 89                | a) 8<br>b) 8                                           | 7 days                              | n.a.                           | 100-1200           | a) 1.25<br>b) See Column Remarks                                           | 21                 | Flexible dosing regimen<br>Total applied must not exceed 30 kg/ha in any rolling 5 year period and 8 kg/ha/yr in any single year.    |

|  |  |  |  |  |  |  |  |  |  |  |  |  |  |  |  |  |  |  |  |                                                                            |
|--|--|--|--|--|--|--|--|--|--|--|--|--|--|--|--|--|--|--|--|----------------------------------------------------------------------------|
|  |  |  |  |  |  |  |  |  |  |  |  |  |  |  |  |  |  |  |  | Annual application must not exceed 5 kg/ha during the bird breeding season |
|--|--|--|--|--|--|--|--|--|--|--|--|--|--|--|--|--|--|--|--|----------------------------------------------------------------------------|

- \* For uses where the column „Remarks“ in marked in grey further consideration is necessary. Uses should be crossed out when the notifier no longer supports this use(s).
- (a) For crops, the EU and Codex classification (both) should be taken into account ; where relevant, the use situation should be described (e.g. fumigation of a structure)
  - (b) Outdoor or field use (F), greenhouse application (G) or indoor application (I)
  - (c) e.g. biting and suckling insects, soil born insects, foliar fungi, weeds
  - (d) e.g. wettable powder (WP), emulsifiable concentrate (EC), granule (GR)
  - (e) GCPF Codes – GIFAP Technical Monograph N° 2, 1989
  - (f) All abbreviations used must be explained
  - (g) Method, e.g. high volume spraying, low volume spraying, spreading, dusting, drench
  - (h) Kind, e.g. overall, broadcast, aerial spraying, row, individual plant, between the plant – type of equipment used must be indicated
  - (i) g/kg or g/L. Normally the rate should be given for the active substance (according to ISO) and not for the variant in order to compare the rate for same active substances used in different variants (e.g. fluoroxypyr). In certain cases, where only one variant synthesised, it is more appropriate to give the rate for the variant (e.g. benthiavalicarb-isopropyl).
  - (j) Growth stage at last treatment (BBCH Monograph, Growth Stages of Plants, 1997, Blackwell, ISBN 3-8263-3152-4), including where relevant, information on season at time of application
  - (k) Indicate the minimum and maximum number of application possible under practical conditions of use
  - (l) The values should be given in g or kg whatever gives the more manageable number (e.g. 200 kg/ha instead of 200 000 g/ha or 12.5 g/ha instead of 0.0125 kg/ha)
  - (m) PHI - minimum pre-harvest interval

| Crop and/or situation (a) | Member State | Product Name | F G I (b) | Pests or group of pests controlled (c)                                            | Formulation |                      | Application                          |                             |                                                        |                                     | Application rate per treatment |                    |                                                                            | PHI (days) (l)     | Remarks (m)                                                                                                                          |
|---------------------------|--------------|--------------|-----------|-----------------------------------------------------------------------------------|-------------|----------------------|--------------------------------------|-----------------------------|--------------------------------------------------------|-------------------------------------|--------------------------------|--------------------|----------------------------------------------------------------------------|--------------------|--------------------------------------------------------------------------------------------------------------------------------------|
|                           |              |              |           |                                                                                   | Type (d-f)  | Conc of a.i. g/L (i) | Method kind (f-h)                    | Growth stage and season (j) | Number min max (k)<br>a) per use<br>b) per crop/season | Interval between applications (min) | Kg a.i./hl min max (g/hl)      | Water l/ha min max | kg a.i./ha<br>a) max. rate per appl.<br>b) max. total rate per crop/season |                    |                                                                                                                                      |
| Grape                     | C/S          | Cuproxat SC  | F         | <i>Bacterial necrosis Elsinoë ampelina</i>                                        | SC          | 190                  | Airblast sprayer                     | BBCH 91 - 11                | a) 3<br>b) 3                                           | 21 days                             | n.a.                           | 400-1000           | a) 1.25<br>b) 3.75                                                         | 90                 |                                                                                                                                      |
| Grape                     | C/S          | Cuproxat SC  | F         | <i>Plasmopara viticola, Elsinoë ampelina</i>                                      | SC          | 190                  | Airblast sprayer<br>Knapsack Sprayer | BBCH 12 - 89                | a) 8<br>b) 8                                           | 7 days                              | n.a.                           | 100-1200           | a) 1.25<br>b) 6.0                                                          | 21                 | Annual application must not exceed 5 kg/ha during the bird breeding season                                                           |
| Tomato                    | C/S          | Cuproxat SC  | F         | <i>Phytophthora spp Alternaria, Colletotrichum, Pseudomonas, Xanthomonas</i>      | SC          | 190                  | Foliar spray                         | BBCH 12 - 89                | a) 8<br>b) 8                                           | 7 days                              | n.a.                           | 200-1000           | a) 0.85<br>b) 6.0                                                          | 3                  | Annual application must not exceed 5 kg/ha during the bird breeding season<br>RMS remarks: No Northern trials were available.        |
| Tomato                    | C/S          | Cuproxat SC  | G         | <i>Phytophthora spp Alternaria, Colletotrichum, Pseudomonas, Xanthomonas</i>      | SC          | 190                  | Foliar spray                         | BBCH 12 - 89                | a) 8<br>b) 8                                           | 7 days                              | n.a.                           | 200-1000           | a) 1.25<br>b) 6.0                                                          | 3                  | Annual application must not exceed 5 kg/ha during the bird breeding season                                                           |
| Cucurbits                 | C/S          | Cuproxat SC  | F         | <i>Peronospora cubensis; Alternaria spp Colletotrichum spp Bacterial diseases</i> | SC          | 190                  | Foliar spray                         | BBCH 10 - 89                | a) 8<br>b) 8                                           | 7 days                              | n.a.                           | 200-1500           | a) 0.85<br>b) 6.0                                                          | See Column Remarks | Annual application must not exceed 5 kg/ha during the bird breeding season<br>PHI: 3 d (Cucumber, zucchini), 7 d (Melon, watermelon) |
| Cucurbits                 | C/S          | Cuproxat SC  | G         | <i>Peronospora cubensis; Alternaria spp Colletotrichum spp Bacterial diseases</i> | SC          | 190                  | Foliar spray                         | BBCH 10 - 89                | a) 8<br>b) 8                                           | 7 days                              | n.a.                           | 200-1500           | a) 1.25<br>b) 6.0                                                          | See Column Remarks | Annual application must not exceed 5 kg/ha during the bird breeding season<br>PHI: 3 d (Cucumber, zucchini), 7 d (Melon, watermelon) |
| Grape                     | C/S          | Cuproxat SC  | F         | <i>Plasmopara viticola, Elsinoë ampelina</i>                                      | SC          | 190                  | Airblast sprayer                     | BBCH 12 - 89                | a) 8<br>b) 8                                           | 7 days                              | n.a.                           | 100-1200           | a) 1.25<br>b) See Column Remarks                                           | 21                 | Flexible dosing regimen<br>Total applied must not exceed 30 kg/ha in any rolling 5 year period and 8 kg/ha/yr in any single          |



|  |  |  |  |  |  |  |  |  |  |  |  |  |  |  |  |  |  |  |                                                                                                     |
|--|--|--|--|--|--|--|--|--|--|--|--|--|--|--|--|--|--|--|-----------------------------------------------------------------------------------------------------|
|  |  |  |  |  |  |  |  |  |  |  |  |  |  |  |  |  |  |  | <p>year.<br/>Annual application must<br/>not exceed 5 kg/ha during<br/>the bird breeding season</p> |
|--|--|--|--|--|--|--|--|--|--|--|--|--|--|--|--|--|--|--|-----------------------------------------------------------------------------------------------------|

- \* For uses where the column „Remarks“ in marked in grey further consideration is necessary. Uses should be crossed out when the notifier no longer supports this use(s).
- (a) For crops, the EU and Codex classification (both) should be taken into account ; where relevant, the use situation should be described (e.g. fumigation of a structure)
  - (b) Outdoor or field use (F), greenhouse application (G) or indoor application (I)
  - (c) e.g. biting and suckling insects, soil born insects, foliar fungi, weeds
  - (d) e.g. wettable powder (WP), emulsifiable concentrate (EC), granule (GR)
  - (e) GCPF Codes – GIFAP Technical Monograph N° 2, 1989
  - (f) All abbreviations used must be explained
  - (g) Method, e.g. high volume spraying, low volume spraying, spreading, dusting, drench
  - (h) Kind, e.g. overall, broadcast, aerial spraying, row, individual plant, between the plant – type of equipment used must be indicated

- (i) g/kg or g/L. Normally the rate should be given for the active substance (according to ISO) and not for the variant in order to compare the rate for same active substances used in different variants (e.g. fluoroxypyr). In certain cases, where only one variant synthesised, it is more appropriate to give the rate for the variant (e.g. bentiavalicarb-isopropyl).
- (j) Growth stage at last treatment (BBCH Monograph, Growth Stages of Plants, 1997, Blackwell, ISBN 3-8263-3152-4), including where relevant, information on season at time of application
- (k) Indicate the minimum and maximum number of application possible under practical conditions of use
- (l) The values should be given in g or kg whatever gives the more manageable number (e.g. 200 kg/ha instead of 200 000 g/ha or 12.5 g/ha instead of 0.0125 kg/ha)
- (m) PHI - minimum pre-harvest interval

| Crop and/or situation (a) | Member State | Product Name | F G I (b) | Pests or group of pests controlled (c)                                                                                  | Formulation |                       | Application                          |                             |                                                        |                                     | Application rate per treatment |                    |                                                                            | PHI (days) (l)     | Remarks (m)                                                                                                                          |
|---------------------------|--------------|--------------|-----------|-------------------------------------------------------------------------------------------------------------------------|-------------|-----------------------|--------------------------------------|-----------------------------|--------------------------------------------------------|-------------------------------------|--------------------------------|--------------------|----------------------------------------------------------------------------|--------------------|--------------------------------------------------------------------------------------------------------------------------------------|
|                           |              |              |           |                                                                                                                         | Type (d-f)  | Conc of a.i. g/kg (i) | Method kind (f-h)                    | Growth stage and season (j) | Number min max (k)<br>a) per use<br>b) per crop/season | Interval between applications (min) | Kg a.i./hl min max (g/hl)      | Water l/ha min max | kg a.i./ha<br>a) max. rate per appl.<br>b) max. total rate per crop/season |                    |                                                                                                                                      |
| Grape                     | C/S          | Nordox 75    | F         | <i>Bacterial necrosis</i><br><i>Elsinoë ampelina</i>                                                                    | WG          | 750                   | Airblast sprayer                     | BBCH 91 - 11                | a) 3<br>b) 3                                           | 21 days                             | n.a.                           | 400-1000           | a) 1.25<br>b) 3.75                                                         | 90                 |                                                                                                                                      |
| Grape                     | C/S          | Nordox 75    | F         | <i>Plasmopara viticola</i> ,<br><i>Elsinoë ampelina</i>                                                                 | WG          | 750                   | Airblast sprayer<br>Knapsack Sprayer | BBCH 12 - 89                | a) 8<br>b) 8                                           | 7 days                              | n.a.                           | 100-1200           | a) 1.25<br>b) 6.0                                                          | 21                 | Annual application must not exceed 5 kg/ha during the bird breeding season                                                           |
| Tomato                    | C/S          | Nordox 75    | F         | <i>Phytophthora spp</i><br><i>Alternaria</i> ,<br><i>Colletotrichum</i> ,<br><i>Pseudomonas</i> ,<br><i>Xanthomonas</i> | WG          | 750                   | Foliar spray                         | BBCH 12 - 89                | a) 8<br>b) 8                                           | 7 days                              | n.a.                           | 200-1000           | a) 0.85<br>b) 6.0                                                          | 3                  | Annual application must not exceed 5 kg/ha during the bird breeding season<br>RMS remarks: No Northern trials were available.        |
| Tomato                    | C/S          | Nordox 75    | G         | <i>Phytophthora spp</i><br><i>Alternaria</i> ,<br><i>Colletotrichum</i> ,<br><i>Pseudomonas</i> ,<br><i>Xanthomonas</i> | WG          | 750                   | Foliar spray                         | BBCH 12 - 89                | a) 8<br>b) 8                                           | 7 days                              | n.a.                           | 200-1000           | a) 1.25<br>b) 6.0                                                          | 3                  | Annual application must not exceed 5 kg/ha during the bird breeding season                                                           |
| Cucurbits                 | C/S          | Nordox 75    | F         | <i>Peronospora cubensis</i> ;<br><i>Alternaria spp</i><br><i>Colletotrichum spp</i><br><i>Bacterial diseases</i>        | WG          | 750                   | Foliar spray                         | BBCH 10 - 89                | a) 8<br>b) 8                                           | 7 days                              | n.a.                           | 200-1500           | a) 0.85<br>b) 6.0                                                          | See Column Remarks | Annual application must not exceed 5 kg/ha during the bird breeding season<br>PHI: 3 d (Cucumber, zucchini), 7 d (Melon, watermelon) |
| Cucurbits                 | C/S          | Nordox 75    | G         | <i>Peronospora cubensis</i> ;<br><i>Alternaria spp</i><br><i>Colletotrichum spp</i><br><i>Bacterial diseases</i>        | WG          | 750                   | Foliar spray                         | BBCH 10 - 89                | a) 8<br>b) 8                                           | 7 days                              | n.a.                           | 200-1500           | a) 1.25<br>b) 6.0                                                          | See Column Remarks | Annual application must not exceed 5 kg/ha during the bird breeding season<br>PHI: 3 d (Cucumber, zucchini), 7 d (Melon, watermelon) |
| Grape                     | C/S          | Nordox 75    | F         | <i>Plasmopara viticola</i> ,<br><i>Elsinoë ampelina</i>                                                                 | WG          | 750                   | Airblast sprayer                     | BBCH 12 - 89                | a) 8<br>b) 8                                           | 7 days                              | n.a.                           | 100-1200           | a) 1.25<br>b) See Column Remarks                                           | 21                 | Flexible dosing regimen<br>Total applied must not exceed 30 kg/ha in any rolling 5 year period and 8 kg/ha/yr in any single          |

|  |  |  |  |  |  |  |  |  |  |  |  |  |  |  |  |  |  |                                                                                           |
|--|--|--|--|--|--|--|--|--|--|--|--|--|--|--|--|--|--|-------------------------------------------------------------------------------------------|
|  |  |  |  |  |  |  |  |  |  |  |  |  |  |  |  |  |  | year.<br>Annual application must<br>not exceed 5 kg/ha during<br>the bird breeding season |
|--|--|--|--|--|--|--|--|--|--|--|--|--|--|--|--|--|--|-------------------------------------------------------------------------------------------|

- \* For uses where the column „Remarks“ in marked in grey further consideration is necessary. Uses should be crossed out when the notifier no longer supports this use(s).
- (a) For crops, the EU and Codex classification (both) should be taken into account ; where relevant, the use situation should be described (e.g. fumigation of a structure)
  - (b) Outdoor or field use (F), greenhouse application (G) or indoor application (I)
  - (c) *e.g.* biting and suckling insects, soil born insects, foliar fungi, weeds
  - (d) *e.g.* wettable powder (WP), emulsifiable concentrate (EC), granule (GR)
  - (e) GCPF Codes – GIFAP Technical Monograph N° 2, 1989
  - (f) All abbreviations used must be explained
  - (g) Method, *e.g.* high volume spraying, low volume spraying, spreading, dusting, drench
  - (h) Kind, *e.g.* overall, broadcast, aerial spraying, row, individual plant, between the plant – type of equipment used must be indicated
  - (i) g/kg or g/L. Normally the rate should be given for the active substance (according to ISO) and not for the variant in order to compare the rate for same active substances used in different variants (e.g. fluoroxypyr). In certain cases, where only one variant synthesised, it is more appropriate to give the rate for the variant (e.g. bentiavalicarb-isopropyl).
  - (j) Growth stage at last treatment (BBCH Monograph, Growth Stages of Plants, 1997, Blackwell, ISBN 3-8263-3152-4), including where relevant, information on season at time of application
  - (k) Indicate the minimum and maximum number of application possible under practical conditions of use
  - (l) The values should be given in g or kg whatever gives the more manageable number (e.g. 200 kg/ha instead of 200 000 g/ha or 12.5 g/ha instead of 0.0125 kg/ha)
  - (m) PHI - minimum pre-harvest interval

**Summary of additional intended uses for which MRL applications have been made, that in addition to the uses above, have also been considered in the consumer risk assessment (name of active substance or the respective variant)**

**Regulation (EC) N° 1107/2009 Article 8.1(g)**

**Important note: efficacy, environmental risk and risk to humans by exposure other than via their diet have not been assessed for these uses**

| Crop and/or situation<br>(a) | Member State or Country | Product name | F G or I<br>(b) | Pests or Group of pests controlled<br>(c) | Preparation   |                   | Application          |                                        |                       |                                       | Application rate per treatment |                       |                              | PHI (days)<br>(m) | Remarks |
|------------------------------|-------------------------|--------------|-----------------|-------------------------------------------|---------------|-------------------|----------------------|----------------------------------------|-----------------------|---------------------------------------|--------------------------------|-----------------------|------------------------------|-------------------|---------|
|                              |                         |              |                 |                                           | Type<br>(d-f) | Conc. a.s.<br>(i) | method kind<br>(f-h) | range of growth stages & season<br>(j) | number min-max<br>(k) | Interval between application<br>(min) | kg a.s./hL<br>min-max<br>(l)   | Water L/ha<br>min-max | kg a.s./ha<br>min-max<br>(l) |                   |         |

**MRL Application** (according to Article 8.1(g) of Regulation (EC) No 1107/2009)

Not applicable

|                                                                                                                                                                                                                                                                                                                                                                                                                                                                                                                                                                                                                                                                                                                                                                                                                                                                     |                                                                                                                                                                                                                                                                                                                                                                                                                                                                                                                                                                                                                                                                                                                                                                                                                                                                                                                                                     |
|---------------------------------------------------------------------------------------------------------------------------------------------------------------------------------------------------------------------------------------------------------------------------------------------------------------------------------------------------------------------------------------------------------------------------------------------------------------------------------------------------------------------------------------------------------------------------------------------------------------------------------------------------------------------------------------------------------------------------------------------------------------------------------------------------------------------------------------------------------------------|-----------------------------------------------------------------------------------------------------------------------------------------------------------------------------------------------------------------------------------------------------------------------------------------------------------------------------------------------------------------------------------------------------------------------------------------------------------------------------------------------------------------------------------------------------------------------------------------------------------------------------------------------------------------------------------------------------------------------------------------------------------------------------------------------------------------------------------------------------------------------------------------------------------------------------------------------------|
| <p>(a) For crops, the EU and Codex classifications (both) should be taken into account; where relevant, the use situation should be described (e.g. fumigation of a structure)</p> <p>(b) Outdoor or field use (F), greenhouse application (G) or indoor application (I)</p> <p>(c) e.g. biting and sucking insects, soil born insects, foliar fungi, weeds</p> <p>(d) e.g. wettable powder (WP), emulsifiable concentrate (EC), granule (GR)</p> <p>(e) CropLife International Technical Monograph no 2, 6th Edition. Revised May 2008. Catalogue of pesticide</p> <p>(f) All abbreviations used must be explained</p> <p>(g) Method, e.g. high volume spraying, low volume spraying, spreading, dusting, drench</p> <p>(h) Kind, e.g. overall, broadcast, aerial spraying, row, individual plant, between the plant- type of equipment used must be indicated</p> | <p>(i) g/kg or g/L. Normally the rate should be given for the active substance (according to ISO) and not for the variant in order to compare the rate for same active substances used in different variants (e.g. fluoroxypr). <b>In certain cases, where only one variant is synthesised, it is more appropriate to give the rate for the variant (e.g. benthialdicarb-isopropyl).</b></p> <p>(j) Growth stage range from first to last treatment (BBCH Monograph, Growth Stages of Plants, 1997, Blackwell, ISBN 3-8263-3152-4), including where relevant, information on season at time of application</p> <p>(k) Indicate the minimum and maximum number of applications possible under practical conditions of use</p> <p>(l) The values should be given in g or kg whatever gives the more manageable number (e.g. 200 kg/ha instead of 200 000 g/ha or 12.5 g/ha instead of 0.0125 kg/ha)</p> <p>(m) PHI - minimum pre-harvest interval</p> |
|---------------------------------------------------------------------------------------------------------------------------------------------------------------------------------------------------------------------------------------------------------------------------------------------------------------------------------------------------------------------------------------------------------------------------------------------------------------------------------------------------------------------------------------------------------------------------------------------------------------------------------------------------------------------------------------------------------------------------------------------------------------------------------------------------------------------------------------------------------------------|-----------------------------------------------------------------------------------------------------------------------------------------------------------------------------------------------------------------------------------------------------------------------------------------------------------------------------------------------------------------------------------------------------------------------------------------------------------------------------------------------------------------------------------------------------------------------------------------------------------------------------------------------------------------------------------------------------------------------------------------------------------------------------------------------------------------------------------------------------------------------------------------------------------------------------------------------------|

**Further information, Efficacy****Effectiveness (Regulation (EU) N° 284/2013, Annex Part A, point 6.2)**

Copper based products have been registered in many EU countries based on detailed national assessments of the efficacy package. More detailed consideration will be fully assessed in the context of subsequent applications for products authorization.

**Adverse effects on field crops (Regulation (EU) N° 284/2013, Annex Part A, point 6.4)**

Copper based products have been registered in many EU countries based on detailed national assessments of the efficacy package. More detailed consideration will be fully assessed in the context of subsequent applications for products authorization.

**Observations on other undesirable or unintended side-effects (Regulation (EU) N° 284/2013, Annex Part A, point 6.5)**

Copper based products have been registered in many EU countries based on detailed national assessments of the efficacy package. More detailed consideration will be fully assessed in the context of subsequent applications for products authorization.

**Groundwater metabolites: Screening for biological activity (SANCO/221/2000-rev.10-final Step 3 a Stage 1)**

Activity against target organism

Not required

## Methods of Analysis

### Analytical methods for the active substance (Regulation (EU) N° 283/2013, Annex Part A, point 4.1 and Regulation (EU) N° 284/2013, Annex Part A, point 5.2)

|                                                     |                                                                                                                                  |
|-----------------------------------------------------|----------------------------------------------------------------------------------------------------------------------------------|
| Technical a.s. (analytical technique)               | Electrolysis method (CIPAC 44/TC/M3.1)<br>Titration method (CIPAC 44/TC/M3.2)                                                    |
| Impurities in technical a.s. (analytical technique) | Heavy metals: ICP/MS or ICP-OES<br>Soluble copper in water: CIPAC MT 98.2<br>Water: CIPAC MT 17.4                                |
| Plant protection product (analytical technique)     | CIPAC method 44/WP/M<br>CIPAC method 44/DP/M<br>Titration method (CIPAC 44/TC/M3.2)<br>complexometric titration with sodium EDTA |

### Analytical methods for residues (Regulation (EU) N° 283/2013, Annex Part A, point 4.2 & point 7.4.2)

#### Residue definitions for monitoring purposes

|                         |                  |
|-------------------------|------------------|
| Food of plant origin    | Total copper     |
| Food of animal origin   | Total copper     |
| Soil                    | Total copper     |
| Sediment                | Total copper     |
| Water surface           | Dissolved copper |
| drinking/ground         | Dissolved copper |
| Air                     | Total copper     |
| Body fluids and tissues | Total copper     |

#### Monitoring/Enforcement methods

|                                                                                               |                                                                                                                                                                                                                   |
|-----------------------------------------------------------------------------------------------|-------------------------------------------------------------------------------------------------------------------------------------------------------------------------------------------------------------------|
| Food/feed of plant origin (analytical technique and LOQ for methods for monitoring purposes)  | AAS method validated for total copper with LOQ = 0.2 mg/kg in plants with high water and high acid content.<br>A method is required for plants with high oil content and dry crops.<br>ILV for plants: open point |
| Food/feed of animal origin (analytical technique and LOQ for methods for monitoring purposes) | not needed for the representative uses                                                                                                                                                                            |
| Soil (analytical technique and LOQ)                                                           | ICP-AES validated for total copper with LOQ = 5 mg/kg in soil                                                                                                                                                     |
| Water (analytical technique and LOQ)                                                          | ICP-MS validated for dissolved copper with LOQ = 0.3 µg/L in surface/drinking water.<br>ILV in drinking water: open point <b>required</b> .<br>A method is required with LOQ ≤ 0.1 µg/L in groundwater.           |

Air (analytical technique and LOQ)

ICP-OES: LOQ = 0.3 ng/m<sup>3</sup>

GF-AAS

A new validation in air is on-going.

Body fluids and tissues (analytical technique and LOQ)

ICP-AES validated for total copper with LOQ = 3.0 mg/kg in plasma, LOQ = 359 mg/kg in liver

### Classification and labelling with regard to physical and chemical data (Regulation (EU) N° 283/2013, Annex Part A, point 10)

Substance

Copper

Harmonised classification according to Regulation (EC) No 1272/2008 and its Adaptations to Technical Process [Table 3.1 of Annex VI of Regulation (EC) No 1272/2008 as amended]<sup>1</sup>:

Not explosive, not oxidizing, not flammable

Peer review proposal <sup>2</sup> for harmonised classification according to Regulation (EC) No 1272/2008:

Not explosive, not oxidizing, not flammable

<sup>1</sup> Regulation (EC) No 1272/2008 of the European Parliament and of the Council of 16 December 2008 on classification, labelling and packaging of substances and mixtures, amending and repealing Directives 67/548/EEC and 1999/45/EC, and amending Regulation (EC) No 1907/2006. OJ L 353, 31.12.2008, 1-1355.

<sup>2</sup> It should be noted that harmonised classification and labelling is formally proposed and decided in accordance with Regulation (EC) No 1272/2008.

## Impact on Human and Animal Health

### Absorption, distribution, metabolism and excretion (toxicokinetics) (Regulation (EU) N° 283/2013, Annex Part A, point 5.1)

|                                                             |                                                                                                                                                                                                                                                                                               |
|-------------------------------------------------------------|-----------------------------------------------------------------------------------------------------------------------------------------------------------------------------------------------------------------------------------------------------------------------------------------------|
| Rate and extent of oral absorption/systemic bioavailability | 50 % copper oral absorption from a mixed diet in human <sup>3</sup> (based on faecal excretion considering endogenous losses of copper)<br>Similar absorption in rats                                                                                                                         |
| Toxicokinetics                                              | C <sub>max</sub> = 10.2 ± 1.0 µg Cu/g liver<br>T <sub>max</sub> = 12 hours (liver)                                                                                                                                                                                                            |
| Distribution                                                | Widely distributed, the liver being the regulation organ.<br>Copper is bound to ceruloplasmin.                                                                                                                                                                                                |
| Potential for bioaccumulation                               | No potential for accumulation, except in cases of genetic disease or chronic administration of high dose (60 mg/person per day), where copper accumulates in the liver                                                                                                                        |
| Rate and extent of excretion                                | Rapidly excreted (> 90%) within 48 hours. Terminal half-life in rat of 10.1 hours. Excretion via the bile. No entero-hepatic circulation occurs. Excretion mainly bound to metallothioneins of the intestinal brush border and lost in faeces. Minor amounts in urine and from skin and hair. |
| Metabolism in animals                                       | Does not occur; copper is a monoatomic ion and cannot be metabolized                                                                                                                                                                                                                          |
| <i>In vitro</i> metabolism                                  | Not required as no metabolism occurs                                                                                                                                                                                                                                                          |
| Toxicologically relevant compounds (animals and plants)     | Copper                                                                                                                                                                                                                                                                                        |
| Toxicologically relevant compounds (environment)            | Copper                                                                                                                                                                                                                                                                                        |

### Acute toxicity (Regulation (EU) N° 283/2013, Annex Part A, point 5.2)

|                                 |                           |                    |             |
|---------------------------------|---------------------------|--------------------|-------------|
| Rat LD <sub>50</sub> oral       | Copper hydroxide:         | 489 mg/kg bw       | <b>H302</b> |
|                                 | Copper oxychloride:       | 299 mg/kg bw       | <b>H301</b> |
|                                 | Bordeaux Mixture:         | >2000 mg/kg bw     |             |
|                                 | Tribasic copper sulphate: | 300-500 mg/kg bw   | <b>H302</b> |
|                                 | Copper (I) oxide:         | 300-500 mg/kg bw   | <b>H302</b> |
| Rat LD <sub>50</sub> dermal     | Copper hydroxide:         | >2000 mg/kg bw     |             |
|                                 | Copper oxychloride:       | >2000 mg/kg bw     |             |
|                                 | Bordeaux Mixture:         | >2000 mg/kg bw     |             |
|                                 | Tribasic copper sulphate: | >2000 mg/kg bw     |             |
|                                 | Copper (I) oxide:         | >2000 mg/kg bw     |             |
| Rat LC <sub>50</sub> inhalation | Copper hydroxide:         | 0.45 mg/L air (WB) | <b>H330</b> |

<sup>3</sup> based on DRAFT SCIENTIFIC OPINION on Dietary Reference Values for copper; EFSA Panel on Dietetic Products, Nutrition and Allergies (NDA), July 2015



*(per 4 h)**(WB = whole body, NO = nose only)*

Skin irritation

Eye irritation

Skin sensitisation

*(M = M&K)*

Phototoxicity

|                           |                     |             |
|---------------------------|---------------------|-------------|
| Copper oxychloride:       | 2.83 mg/L air (NO)  | <b>H332</b> |
| Bordeaux Mixture:         | 1.97 mg/L air (WB)  | <b>H332</b> |
| Tribasic copper sulphate: | Not feasible        |             |
| Copper (I) oxide:         | 2.92 mg/L air (NO)  | <b>H332</b> |
| Copper hydroxide:         | Not irritating      |             |
| Copper oxychloride:       | Not irritating      |             |
| Bordeaux Mixture:         | Not irritating      |             |
| Tribasic copper sulphate: | Not irritating      |             |
| Copper (I) oxide:         | Not irritating      |             |
| Copper hydroxide:         | Irritating Cat. 1   | <b>H318</b> |
| Copper oxychloride:       | Not irritating      |             |
| Bordeaux Mixture:         | Irritating Cat. 1   | <b>H318</b> |
| Tribasic copper sulphate: | Not irritating      |             |
| Copper (I) oxide:         | Irritating Cat. 1   | <b>H318</b> |
| Copper hydroxide:         | Not sensitising (M) |             |
| Copper oxychloride:       | Not sensitising (M) |             |
| Bordeaux Mixture:         | Not sensitising (M) |             |
| Tribasic copper sulphate: | Not sensitising (M) |             |
| Copper (I) oxide:         | Not sensitising (M) |             |
| Not required              |                     |             |

**Short-term toxicity (Regulation (EU) N° 283/2013, Annex Part A, point 5.3)**

Target organ / critical effect

Relevant oral NOAEL

Relevant dermal NOAEL

Relevant inhalation NOAEL

|                                                                                                                                                                                                                                                                                                                                                                                                      |  |
|------------------------------------------------------------------------------------------------------------------------------------------------------------------------------------------------------------------------------------------------------------------------------------------------------------------------------------------------------------------------------------------------------|--|
| Copper sulphate:<br><u>Rat</u> : liver (inflammation), kidney (protein droplets in tubule epithelial cells), stomach (hyperplasia/hyperkeratosis of limiting ridge), some haematological changes<br><u>Mouse</u> : stomach (hyperplasia/hyperkeratosis of limiting ridge)<br><u>Dog</u> : increase in copper level in the kidney, liver and spleen, and elevated levels of serum GPT (ALT)           |  |
| 90-day rat: 16 mg/kg bw per day<br>90-day mouse: 97 mg/kg bw per day<br>1-year dog: 15 mg/kg bw per day (test substance: copper gluconate)                                                                                                                                                                                                                                                           |  |
| 28-day, rabbit: 500 mg/kg bw per day                                                                                                                                                                                                                                                                                                                                                                 |  |
| 28-day, rat: 2 mg/m <sup>3</sup> (systemic NOAEC – highest concentration tested)<br>0.2 mg/m <sup>3</sup> (local NOAEC) based on a pattern of responses observed in the lung and lung-draining lymph nodes typical from inhalation of poorly soluble aerosol particles: histiocytosis, perivascular mononuclear cell infiltrates and acute inflammation of the lungs, and lymphoid hyperplasia (test |  |

|                           |  |
|---------------------------|--|
| substance: cuprous oxide) |  |
|---------------------------|--|

### Genotoxicity (Regulation (EU) N° 283/2013, Annex Part A, point 5.4)

|                            |                                                                                                                                                                                                   |  |
|----------------------------|---------------------------------------------------------------------------------------------------------------------------------------------------------------------------------------------------|--|
| <i>In vitro</i> studies    | Copper sulphate: Negative (Ames)<br>Copper oxychloride: Negative (Ames)<br>Bordeaux Mixture: Negative (Ames)<br>Copper oxide: Negative (Ames)                                                     |  |
| <i>In vivo</i> studies     | Enteral administration:<br>Copper sulphate: Negative (UDS, bone marrow MN tests)<br><br>Parenteral administration (e.g. IP):<br>Copper sulphate: Equivocal results (Bone marrow CA and MN assays) |  |
| Photomutagenicity          | Not required                                                                                                                                                                                      |  |
| Potential for genotoxicity | Copper compounds are unlikely to be genotoxic in normal, correct use. Possibility of oxidative damage to DNA only if the robust homeostatic mechanisms are overwhelmed                            |  |

### Long-term toxicity and carcinogenicity (Regulation (EU) N° 283/2013, Annex Part A, point 5.5)

|                                                  |                                                                                                                                                                             |  |
|--------------------------------------------------|-----------------------------------------------------------------------------------------------------------------------------------------------------------------------------|--|
| Long-term effects (target organ/critical effect) | Rat: liver (hypertrophied hyperchromatic parenchymal cells, necrosis and marked inflammatory reaction), kidneys (changes on the proximal convoluted tubule)                 |  |
| Relevant long-term NOAEL                         | 2-year, rat: 27 mg/kg bw per day (administered as potassium sodium copper chlorophyllin). Study suffering of insufficiencies.<br>Mouse study not available but not required |  |
| Carcinogenicity (target organ, tumour type)      | No carcinogenic potential in rats. No evidence of carcinogenic potential in humans after oral ingestion.                                                                    |  |
| Relevant NOAEL for carcinogenicity               | Adequate NOAEL/LOAEL not derived<br>Weight of evidence indicates no carcinogenic hazard at realistic levels of exposure                                                     |  |

### Reproductive toxicity (Regulation (EU) N° 283/2013, Annex Part A, point 5.6)

#### Reproduction toxicity

|                                       |                                                                                                                                                                                    |  |
|---------------------------------------|------------------------------------------------------------------------------------------------------------------------------------------------------------------------------------|--|
| Reproduction target / critical effect | Rats (copper sulphate):<br>Parental toxicity: Slightly reduced spleen weight with no histopathological correlate<br>Reproductive toxicity: No adverse effect in 2-generation study |  |
|---------------------------------------|------------------------------------------------------------------------------------------------------------------------------------------------------------------------------------|--|

|                             |                                                                                        |  |
|-----------------------------|----------------------------------------------------------------------------------------|--|
| Relevant parental NOAEL     | Offspring toxicity: Slightly reduced spleen weight with no histopathological correlate |  |
| Relevant reproductive NOAEL | 15 mg/kg bw per day                                                                    |  |
| Relevant offspring NOAEL    | 24 mg/kg bw per day                                                                    |  |
|                             | 15 mg/kg bw per day                                                                    |  |

### Developmental toxicity

Developmental target / critical effect

|                              |                                                                                                                                                                                                                                                                                                                                                                                                                                          |  |
|------------------------------|------------------------------------------------------------------------------------------------------------------------------------------------------------------------------------------------------------------------------------------------------------------------------------------------------------------------------------------------------------------------------------------------------------------------------------------|--|
|                              | <p><u>Mouse</u> (copper sulphate):<br/>Maternal toxicity: No data given<br/>Developmental toxicity: Decreased foetal weight, increased foetal mortality and incidence of abnormalities</p> <p><u>Rabbit</u> (copper hydroxide):<br/>Maternal toxicity: Inappetance, initial body weight loss and lower mean weight gain (31-72%), gastrointestinal disturbance<br/>Developmental toxicity: Increased incidence of supernumerary ribs</p> |  |
| Relevant maternal NOAEL      | <p>Mouse: Not determined<br/>Rabbit: 6 mg Cu/kg per day*</p>                                                                                                                                                                                                                                                                                                                                                                             |  |
| Relevant developmental NOAEL | <p>Mouse: 100 mg Cu/kg per day<br/>Rabbit: 6 mg Cu/kg per day*</p>                                                                                                                                                                                                                                                                                                                                                                       |  |

\* Note: it must be considered that the received dose cannot be adequately quantified, owing to the refection (coprophagy) in rabbits and results in a second enteral exposure to that proportion of the administered copper that is excreted in faeces.

### Neurotoxicity (Regulation (EU) N° 283/2013, Annex Part A, point 5.7)

Acute neurotoxicity

Repeated neurotoxicity

|                                                                              |                                                                                                                                                                                                                                                                                                                                                                        |  |
|------------------------------------------------------------------------------|------------------------------------------------------------------------------------------------------------------------------------------------------------------------------------------------------------------------------------------------------------------------------------------------------------------------------------------------------------------------|--|
| Acute neurotoxicity                                                          | No data available                                                                                                                                                                                                                                                                                                                                                      |  |
| Repeated neurotoxicity                                                       | <p>A study in rat showed a reduction of exploratory activity after 90-day gavage administration of 25 mg Cu/kg bw per day as copper sulphate.</p> <p>A study in rats showed pro-oxidative effects in plasma and brain, modified brain lipids, increases in markers of programmed cell death in brain after a 30-day dietary administration of low level of copper.</p> |  |
| Additional studies (e.g. delayed neurotoxicity, developmental neurotoxicity) | Delayed neurotoxicity assessment not required                                                                                                                                                                                                                                                                                                                          |  |

## Other toxicological studies (Regulation (EU) N° 283/2013, Annex Part A, point 5.8)

Supplementary studies on the active substance

Immunotoxicity: no evidence of immunotoxicity of copper at realistic levels of exposure.

Humans (dietary, 5 months): minor changes in immune function (reduced IL2R, increased IL6, reduced response to influenza vaccine) at 7- 8 mg Cu per day. NOAEL not investigated

Mice (drinking water, 3-10 weeks): copper can cause an inhibition of the immune response probably through an indirect mechanism involving zinc deficiency caused by excess copper.

Alzheimer's disease (AD): a possible causative link between disturbed copper homeostasis and AD pathology in humans remains unclear.

Animal studies suggest that low level of copper in drinking water associated with a high-fat diet might disrupt amyloid- $\beta$  homeostasis in the brain, with consequent relevance to AD

Clinical trial in patients with mild AD: copper supplementation of 8 mg Cu daily for 12 months does not induce changes in cognitive abilities or any enhancement of the progression of AD.

Neurotoxicity:

A mechanistic study using fish DNA has demonstrated a possible pathway by which oxidative damage to neurons might be caused, with catecholamines being oxidized to reactive oxygen species (ROS) in the presence of transition metals, including copper.

Allergy to copper:

Humans (patch testing): NOAEL 5% Cu in petrolatum. LOAEL not established

No published evidence for ED potential. Evidence *in vitro* that copper is not estrogenic and that its presence in water between  $10^{-4}$  and  $10^{-7}$  M can mitigate the oestrogenic potential of some EDCs

Studies performed on metabolites or impurities

Metabolites not relevant; no studies performed

**Medical data (Regulation (EU) N° 283/2013, Annex Part A, point 5.9)**

The evidence shows that European diets contain copper at between 1 and 2 mg Cu/person per day. Copper has been used as a plant protection product for over 100 years. Data on humans show that repeated long-term intakes greater than 30 mg/day are toxic, intakes between 10 and 30 mg/day are without ill-effect, and that intakes of up to 10 mg/day do not even challenge the homeostatic mechanisms.

From more than 30 years of use the few adverse effects observed were clearly related to well known potential for slight to severe eye irritation.

In case of physiological (genetic) dysfunction in human, two diseases could occur in man namely Wilson's disease, and Menkes' disease which are well documented in the medical literature. For both diseases the copper accumulation causes different effects including neurological ones (e.g. degeneration basal ganglia, mental retardation, seizures)

WHO 1996: proposal of upper limits to the safe range of population mean intakes:

For Adults: 10-12 mg Cu/day corresponding to 0.2 mg Cu/kg bw per day

For Children: 0.15 mg Cu/kg bw per day

**Summary<sup>4</sup> (Regulation (EU) N°1107/2009, Annex II, point 3.1 and 3.6)**

Acceptable Daily Intake (ADI)

Acute Reference Dose (ARfD)

Acceptable Operator Exposure Level (AOEL)

Acute Acceptable Operator Exposure Level (AAOEL)

| Value<br>(mg Cu/kg bw (per day)) | Study                                                                | Uncertainty factor     |
|----------------------------------|----------------------------------------------------------------------|------------------------|
| 0.15                             | based on human data (WHO value of 0.15 mg Cu/kg bw/day for children) | No SF for human data   |
| Not allocated – not necessary    |                                                                      |                        |
| 0.08                             | based on human data (WHO value of 0.15 mg Cu/kg bw/day for children) | No SF for human data * |
| Not allocated – not necessary    |                                                                      |                        |

\* Including correction for limited oral absorption/bioavailability (50%).

Previously agreed reference values approved for the first inclusion:

ADI: same value

AOEL: 0.072 mg/kg bw/d (based on WHO value 0.2 mg Cu/kg bw/d for adults supported by 1-year dog study and 90-day rat studies) corrected by 36% oral absorption and applying an UF of 100.

ARfD: not necessary

<sup>4</sup> If available include also reference values for metabolites

### Dermal absorption (Regulation (EU) N° 284/2013, Annex Part A, point 7.3)

Representative formulations:

Five copper forms: hydroxide copper, oxychloride copper, Bordeaux mixture and copper (I) oxide, tribasic copper sulphate as WP, WG or SC formulations.

Concentrate: 1 %

Spray dilution (0.33g Cu/L): 9%

Based on *in vitro* through human skin studies performed with representative formulations.

### Exposure scenarios (Regulation (EU) N° 284/2013, Annex Part A, point 7.2)

#### NORDOX 75 WG

Operators

Use: tomato, cucurbit (outdoor), tractor mounted equipment, application rate 0,85 kg a.s./ha

Exposure estimates (model): % of AOEL

UK POEM

Without PPE: 419

PPE (gloves): 89

German model

Without PPE: 64

EFSA model:

Coverall 20

Use: grapes, broadcast air-assisted equipment, application rate 1,25 kg a.s./ha

Exposure estimates (model): % of AOEL

UK POEM

Without PPE: 1811

PPE (gloves): 1155

German model

Without PPE: 194

PPE (gloves and coverall): 31

EFSA model:

Coverall 83

Use: tomato, cucurbits (indoor), handheld equipment, application rate 1.25 kg a.s./ha

Exposure estimates (model): % of AOEL

German model:

Without PPE: 93

PPE (gloves): 19

ECPA greenhouse model

Without PPE: 102

PPE (gloves and coverall): 51

EFSA model:

Coverall 31

Workers

|                                                                      |                  |
|----------------------------------------------------------------------|------------------|
| <u>Use: grapes (1.25 kg Cu/ha, refined DT<sub>50</sub> (7 days))</u> |                  |
| <u>Exposure estimates</u>                                            | <u>% of AOEL</u> |
| <b><u>EUROPOEM II</u></b>                                            |                  |
| <i>8 applications, interval between application of 7 days:</i>       |                  |
| Without PPE (work wear, bare hands)                                  | 1130             |
| <i>3 applications, interval between application of 21 days:</i>      |                  |
| Without PPE (work wear, bare hands)                                  | 624              |
| <b><u>EFSA model</u></b>                                             |                  |
| <i>8 applications, interval between application of 7 days:</i>       |                  |
| Without PPE (work wear, bare hands)                                  | 1125             |
| <i>3 applications, interval between application of 21 days:</i>      |                  |
| Without PPE (work wear, bare hands)                                  | 650              |

|                                                                                          |                  |
|------------------------------------------------------------------------------------------|------------------|
| <u>Use: tomato, cucurbits (1.25 kg as/ha, indoor, refined DT<sub>50</sub> of 7 days)</u> |                  |
| <u>Exposure estimates</u>                                                                | <u>% of AOEL</u> |
| <b><u>EUROPOEM II</u></b>                                                                |                  |
| <i>8 applications, interval between application of 7 days:</i>                           |                  |
| Without PPE (workwear, bare hands)                                                       | 280              |
| With PPE (workwear + gloves)                                                             | 65               |
| <b><u>EFSA model:</u></b>                                                                |                  |
| <i>8 applications, interval between application of 7 days:</i>                           |                  |
| Without PPE (workwear, bare hands)                                                       | 280              |
| With PPE (workwear + gloves)                                                             | 65               |

Bystanders and residents

|                                                                                            |                      |
|--------------------------------------------------------------------------------------------|----------------------|
| <u>Use: grapes (worst case scenario):1.25 kg Cu/ha, refined DT<sub>50</sub> of 7 days)</u> |                      |
| <u>Exposure estimates</u>                                                                  | <u>% of AOEL</u>     |
| <b><u>EUROPOEM II :</u></b>                                                                |                      |
| Bystander ( <i>adults</i> )                                                                | 9.7                  |
| <b><u>Martin et al. (2008):</u></b>                                                        |                      |
| Bystander                                                                                  |                      |
| <i>Adults</i>                                                                              | 8.5                  |
| <i>Child</i>                                                                               | 6.7                  |
| Resident ( <i>worst case: 8 applications, 7 days interval</i> )                            |                      |
| <i>Adults</i>                                                                              | 1.6                  |
| <i>Child</i>                                                                               | 3.2                  |
| <b><u>EFSA model:</u></b>                                                                  |                      |
| <i>Bystander</i>                                                                           | <i>not necessary</i> |
| Resident (sum) :                                                                           |                      |
| <i>8 applications, 7 days interval</i>                                                     |                      |
| <i>Child</i>                                                                               | 171                  |
| <i>Adult</i>                                                                               | 93                   |
| <i>3 applications, 21 days interval</i>                                                    |                      |
| <i>Child</i>                                                                               | 154                  |
| <i>Adult</i>                                                                               | 84                   |

|                                                                                            |                      |
|--------------------------------------------------------------------------------------------|----------------------|
| <u>Use:</u> tomato, cucurbits (0.85 kg as/ha, outdoor, refined DT <sub>50</sub> of 7 days) |                      |
| <b><u>EFSA model:</u></b>                                                                  |                      |
| <i>Bystander</i>                                                                           | <i>not necessary</i> |
| Resident (sum)                                                                             |                      |
| <i>8 applications, 7 days interval</i>                                                     |                      |
| <i>Child</i>                                                                               | 33                   |
| <i>Adult</i>                                                                               | 16                   |

## FUNGURAN OH

Operators

|                                                                                                     |                  |
|-----------------------------------------------------------------------------------------------------|------------------|
| <u>Use:</u> tomato, curcubit (outdoor), tractor mounted equipment, application rate 0.85 kg a.s./ha |                  |
| <u>Exposure estimates (model):</u>                                                                  | <u>% of AOEL</u> |
| <b><u>UK POEM</u></b>                                                                               |                  |
| Without PPE:                                                                                        | 642              |
| PPE (gloves):                                                                                       | 244              |
| <b><u>German model</u></b>                                                                          |                  |
| Without PPE:                                                                                        | 95               |
| PPE (gloves):                                                                                       | 67               |
| <b><u>EFSA model:</u></b>                                                                           |                  |
| Coverall                                                                                            | 248              |
| Coverall + Gloves                                                                                   | 149              |
| Coverall + gloves + RPE (mask M/L)                                                                  | 45               |
| <u>Use:</u> grapes, broadcast air-assisted equipment, application rate 1,25 kg a.s./ha              |                  |
| <u>Exposure estimates (model):</u>                                                                  | <u>% of AOEL</u> |
| <b><u>UK POEM</u></b>                                                                               |                  |
| Without PPE:                                                                                        | 1900             |
| PPE (gloves):                                                                                       | 1221             |
| <b><u>German model</u></b>                                                                          |                  |
| Without PPE:                                                                                        | 211              |
| PPE (gloves and coverall):                                                                          | 43               |
| <b><u>EFSA model:</u></b>                                                                           |                  |
| Coverall                                                                                            | 213              |
| Gloves + Coverall                                                                                   | 135              |
| Coverall + gloves + RPE (mask M/L)                                                                  | 63               |



Workers

|                                                                                              |                  |
|----------------------------------------------------------------------------------------------|------------------|
| <u>Use: tomato, cucurbits (indoor), handheld equipment, application rate 1.25 kg a.s./ha</u> |                  |
| <u>Exposure estimates (model):</u>                                                           | <u>% of AOEL</u> |
| <u>German model:</u>                                                                         |                  |
| Without PPE:                                                                                 | 117              |
| PPE (gloves):                                                                                | 85               |
| <u>ECPA greenhouse model</u>                                                                 |                  |
| Without PPE:                                                                                 | 114              |
| PPE (gloves and coverall):                                                                   | 56               |
| <u>EFSA model:</u>                                                                           |                  |
| Coverall                                                                                     | 120              |
| Coverall + gloves                                                                            | 84               |
| <u>Use: grapes (1.25 kg Cu/ha, refined DT<sub>50</sub> (7 days))</u>                         |                  |
| <u>Exposure estimates</u>                                                                    | <u>% of AOEL</u> |
| <b><u>EUROPOEM II</u></b>                                                                    |                  |
| <i>8 applications, interval between application of 7 days:</i>                               |                  |
| Without PPE (work wear, bare hands)                                                          | 1130             |
| <i>3 applications, interval between application of 21 days:</i>                              |                  |
| Without PPE (work wear, bare hands)                                                          | 624              |
| <b><u>EFSA model</u></b>                                                                     |                  |
| <i>8 applications, interval between application of 7 days:</i>                               |                  |
| Without PPE (work wear, bare hands)                                                          | 1125             |
| <i>3 applications, interval between application of 21 days:</i>                              |                  |
| Without PPE (work wear, bare hands)                                                          | 650              |
| <u>Use: tomato, cucurbits (1.25 kg as/ha, indoor, refined DT<sub>50</sub> of 7 days)</u>     |                  |
| <u>Exposure estimates</u>                                                                    | <u>% of AOEL</u> |
| <b><u>EUROPOEM II</u></b>                                                                    |                  |
| <i>8 applications, interval between application of 7 days:</i>                               |                  |
| Without PPE (workwear, bare hands)                                                           | 280              |
| With PPE (workwear + gloves)                                                                 | 65               |
| <b><u>EFSA model:</u></b>                                                                    |                  |
| <i>8 applications, interval between application of 7 days:</i>                               |                  |
| Without PPE (workwear, bare hands)                                                           | 280              |
| With PPE (workwear + gloves)                                                                 | 65               |

Bystanders and residents

|                                                                                            |                      |
|--------------------------------------------------------------------------------------------|----------------------|
| <u>Use: grapes (worst case scenario):1.25 kg Cu/ha, refined DT<sub>50</sub> of 7 days)</u> |                      |
| <u>Exposure estimates</u>                                                                  | <u>% of AOEL</u>     |
| <b><u>EUROPOEM II :</u></b>                                                                |                      |
| Bystander ( <i>adults</i> )                                                                | 9.7                  |
| <b><u>Martin et al. (2008):</u></b>                                                        |                      |
| Bystander                                                                                  |                      |
| <i>Adults</i>                                                                              | 8.5                  |
| <i>Child</i>                                                                               | 6.7                  |
| Resident ( <i>worst case: 8 applications, 7 days interval</i> )                            |                      |
| <i>Adults</i>                                                                              | 1.6                  |
| <i>Child</i>                                                                               | 3.2                  |
| <b><u>EFSA model:</u></b>                                                                  |                      |
| <i>Bystander</i>                                                                           | <i>not necessary</i> |
| Resident (sum) :                                                                           |                      |
| <i>8 applications, 7 days interval</i>                                                     |                      |
| <i>Child</i>                                                                               | 171                  |
| <i>Adult</i>                                                                               | 93                   |
| <i>3 applications, 21 days interval</i>                                                    |                      |
| <i>Child</i>                                                                               | 154                  |
| <i>Adult</i>                                                                               | 84                   |
| <u>Use: tomato, cucurbits (0.85 kg as/ha,outdoor, refined DT<sub>50</sub> of 7 days)</u>   |                      |
| <b><u>EFSA model:</u></b>                                                                  |                      |
| <i>Bystander</i>                                                                           | <i>not necessary</i> |
| Resident (sum)                                                                             |                      |
| <i>8 applications, 7 days interval</i>                                                     |                      |
| <i>Child</i>                                                                               | 33                   |
| <i>Adult</i>                                                                               | 16                   |

**POLTIGLIA CAFFARO 20DF**

Operators

|                                                                                                     |                  |
|-----------------------------------------------------------------------------------------------------|------------------|
| <u>Use: tomato, curcubit (outdoor), tractor mounted equipment, application rate_0,85 kg a.s./ha</u> |                  |
| <u>Exposure estimates (model):</u>                                                                  | <u>% of AOEL</u> |
| <b><u>UK POEM</u></b>                                                                               |                  |
| Without PPE:                                                                                        | 419              |
| PPE (gloves):                                                                                       | 89               |
| <b><u>German model</u></b>                                                                          |                  |
| Without PPE:                                                                                        | 64.5             |
| <b><u>EFSA model:</u></b>                                                                           |                  |
| Coverall                                                                                            | 20               |

Workers

|                                                                                              |                  |
|----------------------------------------------------------------------------------------------|------------------|
| <u>Use: grapes, broadcast air-assisted equipment, application rate 1,25 kg a.s./ha</u>       |                  |
| <u>Exposure estimates (model):</u>                                                           | <u>% of AOEL</u> |
| <b><u>UK POEM</u></b>                                                                        |                  |
| Without PPE:                                                                                 | 1811             |
| PPE (gloves):                                                                                | 1155             |
| <b><u>German model</u></b>                                                                   |                  |
| Without PPE:                                                                                 | 194              |
| PPE (gloves and coverall):                                                                   | 31               |
| <b><u>EFSA model:</u></b>                                                                    |                  |
| Coverall                                                                                     | 83               |
| <u>Use: tomato, curcubits (indoor), handheld equipment, application rate 1.25 kg a.s./ha</u> |                  |
| <u>Exposure estimates (model):</u>                                                           | <u>% of AOEL</u> |
| <b><u>German model:</u></b>                                                                  |                  |
| Without PPE:                                                                                 | 93               |
| PPE (gloves):                                                                                | 19.5             |
| <b><u>ECPA greenhouse model</u></b>                                                          |                  |
| Without PPE:                                                                                 | 102              |
| PPE (gloves and coverall):                                                                   | 51               |
| <b><u>EFSA model:</u></b>                                                                    |                  |
| Coverall                                                                                     | 31               |
| <u>Use: grapes (1.25 kg Cu/ha, refined DT<sub>50</sub> (7 days))</u>                         |                  |
| <u>Exposure estimates</u>                                                                    | <u>% of AOEL</u> |
| <b><u>EUROPOEM II</u></b>                                                                    |                  |
| <i>8 applications, interval between application of 7 days:</i>                               |                  |
| Without PPE (work wear, bare hands)                                                          | 1130             |
| <i>3 applications, interval between application of 21 days:</i>                              |                  |
| Without PPE (work wear, bare hands)                                                          | 624              |
| <b><u>EFSA model</u></b>                                                                     |                  |
| <i>8 applications, interval between application of 7 days:</i>                               |                  |
| Without PPE (work wear, bare hands)                                                          | 1125             |
| <i>3 applications, interval between application of 21 days:</i>                              |                  |
| Without PPE (work wear, bare hands)                                                          | 650              |
| <u>Use: tomato, cucurbits (1.25 kg as/ha, indoor, refined DT<sub>50</sub> of 7 days)</u>     |                  |
| <u>Exposure estimates</u>                                                                    | <u>% of AOEL</u> |
| <b><u>EUROPOEM II</u></b>                                                                    |                  |
| <i>8 applications, interval between application of 7 days:</i>                               |                  |
| Without PPE (workwear, bare hands)                                                           | 280              |
| With PPE (workwear + gloves)                                                                 | 65               |
| <b><u>EFSA model:</u></b>                                                                    |                  |
| <i>8 applications, interval between application of 7 days:</i>                               |                  |
| Without PPE (workwear, bare hands)                                                           | 280              |
| With PPE (workwear + gloves)                                                                 | 65               |

Bystanders and residents

|                                                                                            |                      |
|--------------------------------------------------------------------------------------------|----------------------|
| <u>Use: grapes (worst case scenario):1.25 kg Cu/ha, refined DT<sub>50</sub> of 7 days)</u> |                      |
| <u>Exposure estimates</u>                                                                  | <u>% of AOEL</u>     |
| <b><u>EUROPOEM II :</u></b>                                                                |                      |
| Bystander ( <i>adults</i> )                                                                | 9.7                  |
| <b><u>Martin et al. (2008):</u></b>                                                        |                      |
| Bystander                                                                                  |                      |
| <i>Adults</i>                                                                              | 8.5                  |
| <i>Child</i>                                                                               | 6.7                  |
| Resident ( <i>worst case: 8 applications, 7 days interval</i> )                            |                      |
| <i>Adults</i>                                                                              | 1.6                  |
| <i>Child</i>                                                                               | 3.2                  |
| <b><u>EFSA model:</u></b>                                                                  |                      |
| <i>Bystander</i>                                                                           | <i>not necessary</i> |
| Resident (sum) :                                                                           |                      |
| <i>8 applications, 7 days interval</i>                                                     |                      |
| <i>Child</i>                                                                               | 171                  |
| <i>Adult</i>                                                                               | 93                   |
| <i>3 applications, 21 days interval</i>                                                    |                      |
| <i>Child</i>                                                                               | 154                  |
| <i>Adult</i>                                                                               | 84                   |
| <u>Use: tomato, cucurbits (0.85 kg as/ha,outdoor, refined DT<sub>50</sub> of 7 days)</u>   |                      |
| <b><u>EFSA model:</u></b>                                                                  |                      |
| <i>Bystander</i>                                                                           | <i>not necessary</i> |
| Resident (sum)                                                                             |                      |
| <i>8 applications, 7 days interval</i>                                                     |                      |
| <i>Child</i>                                                                               | 33                   |
| <i>Adult</i>                                                                               | 16                   |

**CUPROXAT SC**

Operators

|                                                                                                     |                  |
|-----------------------------------------------------------------------------------------------------|------------------|
| <u>Use: tomato, curcubit (outdoor), tractor mounted equipment, application rate_0,85 kg a.s./ha</u> |                  |
| <u>Exposure estimates (model):</u>                                                                  | <u>% of AOEL</u> |
| <b><u>UK POEM</u></b>                                                                               |                  |
| Without PPE:                                                                                        | 354              |
| PPE (gloves):                                                                                       | 57               |
| <b><u>German model</u></b>                                                                          |                  |
| Without PPE:                                                                                        | 64               |
| <b><u>EFSA model:</u></b>                                                                           |                  |
| Coverall                                                                                            | 31               |

Workers

|                                                                                              |                  |
|----------------------------------------------------------------------------------------------|------------------|
| <u>Use: grapes, broadcast air-assisted equipment, application rate 1,25 kg a.s./ha</u>       |                  |
| <u>Exposure estimates (model):</u>                                                           | <u>% of AOEL</u> |
| <b><u>UK POEM</u></b>                                                                        |                  |
| Without PPE:                                                                                 | 1775             |
| PPE (gloves):                                                                                | 1137             |
| <b><u>German model</u></b>                                                                   |                  |
| Without PPE:                                                                                 | 192              |
| PPE (gloves and coverall):                                                                   | 30               |
| <b><u>EFSA model:</u></b>                                                                    |                  |
| Coverall                                                                                     | 87               |
| <u>Use: tomato, curcubits (indoor), handheld equipment, application rate 1.25 kg a.s./ha</u> |                  |
| <u>Exposure estimates (model):</u>                                                           | <u>% of AOEL</u> |
| <b><u>German model:</u></b>                                                                  |                  |
| Without PPE:                                                                                 | 135              |
| PPE (gloves):                                                                                | 20               |
| <b><u>ECPA greenhouse model</u></b>                                                          |                  |
| Without PPE:                                                                                 | 102              |
| PPE (gloves and coverall):                                                                   | 51               |
| <b><u>EFSA model:</u></b>                                                                    |                  |
| Coverall                                                                                     | 31               |
| <u>Use: grapes (1.25 kg Cu/ha, refined DT<sub>50</sub> (7 days))</u>                         |                  |
| <u>Exposure estimates</u>                                                                    | <u>% of AOEL</u> |
| <b><u>EUROPOEM II</u></b>                                                                    |                  |
| <i>8 applications, interval between application of 7 days:</i>                               |                  |
| Without PPE (work wear, bare hands)                                                          | 1130             |
| <i>3 applications, interval between application of 21 days:</i>                              |                  |
| Without PPE (work wear, bare hands)                                                          | 624              |
| <b><u>EFSA model</u></b>                                                                     |                  |
| <i>8 applications, interval between application of 7 days:</i>                               |                  |
| Without PPE (work wear, bare hands)                                                          | 1125             |
| <i>3 applications, interval between application of 21 days:</i>                              |                  |
| Without PPE (work wear, bare hands)                                                          | 650              |
| <u>Use: tomato, cucurbits (1.25 kg as/ha, indoor, refined DT<sub>50</sub> of 7 days)</u>     |                  |
| <u>Exposure estimates</u>                                                                    | <u>% of AOEL</u> |
| <b><u>EUROPOEM II</u></b>                                                                    |                  |
| <i>8 applications, interval between application of 7 days:</i>                               |                  |
| Without PPE (workwear, bare hands)                                                           | 280              |
| With PPE (workwear + gloves)                                                                 | 65               |
| <b><u>EFSA model:</u></b>                                                                    |                  |
| <i>8 applications, interval between application of 7 days:</i>                               |                  |
| Without PPE (workwear, bare hands)                                                           | 280              |
| With PPE (workwear + gloves)                                                                 | 65               |

Bystanders and residents

|                                                                                            |                      |
|--------------------------------------------------------------------------------------------|----------------------|
| <u>Use: grapes (worst case scenario):1.25 kg Cu/ha, refined DT<sub>50</sub> of 7 days)</u> |                      |
| <u>Exposure estimates</u>                                                                  | <u>% of AOEL</u>     |
| <b><u>EUROPOEM II :</u></b>                                                                |                      |
| Bystander ( <i>adults</i> )                                                                | 9.7                  |
| <b><u>Martin et al. (2008):</u></b>                                                        |                      |
| Bystander                                                                                  |                      |
| <i>Adults</i>                                                                              | 8.5                  |
| <i>Child</i>                                                                               | 6.7                  |
| Resident ( <i>worst case: 8 applications, 7 days interval</i> )                            |                      |
| <i>Adults</i>                                                                              | 1.6                  |
| <i>Child</i>                                                                               | 3.2                  |
| <b><u>EFSA model:</u></b>                                                                  |                      |
| <i>Bystander</i>                                                                           | <i>not necessary</i> |
| Resident (sum) :                                                                           |                      |
| <i>8 applications, 7 days interval</i>                                                     |                      |
| <i>Child</i>                                                                               | 171                  |
| <i>Adult</i>                                                                               | 93                   |
| <i>3 applications, 21 days interval</i>                                                    |                      |
| <i>Child</i>                                                                               | 154                  |
| <i>Adult</i>                                                                               | 84                   |
| <u>Use: tomato, cucurbits (0.85 kg as/ha,outdoor, refined DT<sub>50</sub> of 7 days)</u>   |                      |
| <b><u>EFSA model:</u></b>                                                                  |                      |
| <i>Bystander</i>                                                                           | <i>not necessary</i> |
| Resident (sum)                                                                             |                      |
| <i>8 applications, 7 days interval</i>                                                     |                      |
| <i>Child</i>                                                                               | 33                   |
| <i>Adult</i>                                                                               | 16                   |

**CURENOX 50WG**

Operators

|                                                                                                     |                  |
|-----------------------------------------------------------------------------------------------------|------------------|
| <u>Use: tomato, curcubit (outdoor), tractor mounted equipment, application rate_0,85 kg a.s./ha</u> |                  |
| <u>Exposure estimates (model):</u>                                                                  | <u>% of AOEL</u> |
| <b><u>UK POEM</u></b>                                                                               |                  |
| Without PPE:                                                                                        | 419              |
| PPE (gloves):                                                                                       | 89               |
| <b><u>German model</u></b>                                                                          |                  |
| Without PPE:                                                                                        | 64               |
| <b><u>EFSA model:</u></b>                                                                           |                  |
| Coverall                                                                                            | 20               |

Workers

|                                                                                              |                  |
|----------------------------------------------------------------------------------------------|------------------|
| <u>Use: grapes, broadcast air-assisted equipment, application rate 1,25 kg a.s./ha</u>       |                  |
| <u>Exposure estimates (model):</u>                                                           | <u>% of AOEL</u> |
| <b><u>UK POEM</u></b>                                                                        |                  |
| Without PPE:                                                                                 | 1811             |
| PPE (gloves):                                                                                | 1152             |
| <b><u>German model</u></b>                                                                   |                  |
| Without PPE:                                                                                 | 192              |
| PPE (gloves and coverall):                                                                   | 31               |
| <b><u>EFSA model:</u></b>                                                                    |                  |
| Coverall                                                                                     | 83               |
| <u>Use: tomato, curcubits (indoor), handheld equipment, application rate 1.25 kg a.s./ha</u> |                  |
| <u>Exposure estimates (model):</u>                                                           | <u>% of AOEL</u> |
| <b><u>German model:</u></b>                                                                  |                  |
| Without PPE:                                                                                 | 93               |
| PPE (gloves):                                                                                | 19               |
| <b><u>ECPA greenhouse model</u></b>                                                          |                  |
| Without PPE:                                                                                 | 102              |
| PPE (gloves and coverall):                                                                   | 51               |
| <b><u>EFSA model:</u></b>                                                                    |                  |
| Coverall                                                                                     | 31               |
| <u>Use: grapes (1.25 kg Cu/ha, refined DT<sub>50</sub> (7 days))</u>                         |                  |
| <u>Exposure estimates</u>                                                                    | <u>% of AOEL</u> |
| <b><u>EUROPOEM II</u></b>                                                                    |                  |
| <i>8 applications, interval between application of 7 days:</i>                               |                  |
| Without PPE (work wear, bare hands)                                                          | 1130             |
| <i>3 applications, interval between application of 21 days:</i>                              |                  |
| Without PPE (work wear, bare hands)                                                          | 624              |
| <b><u>EFSA model</u></b>                                                                     |                  |
| <i>8 applications, interval between application of 7 days:</i>                               |                  |
| Without PPE (work wear, bare hands)                                                          | 1125             |
| <i>3 applications, interval between application of 21 days:</i>                              |                  |
| Without PPE (work wear, bare hands)                                                          | 650              |
| <u>Use: tomato, cucurbits (1.25 kg as/ha, indoor, refined DT<sub>50</sub> of 7 days)</u>     |                  |
| <u>Exposure estimates</u>                                                                    | <u>% of AOEL</u> |
| <b><u>EUROPOEM II</u></b>                                                                    |                  |
| <i>8 applications, interval between application of 7 days:</i>                               |                  |
| Without PPE (workwear, bare hands)                                                           | 280              |
| With PPE (workwear + gloves)                                                                 | 65               |
| <b><u>EFSA model:</u></b>                                                                    |                  |
| <i>8 applications, interval between application of 7 days:</i>                               |                  |
| Without PPE (workwear, bare hands)                                                           | 280              |
| With PPE (workwear + gloves)                                                                 | 65               |

Bystanders and residents

|                                                                                            |                      |
|--------------------------------------------------------------------------------------------|----------------------|
| <u>Use: grapes (worst case scenario):1.25 kg Cu/ha, refined DT<sub>50</sub> of 7 days)</u> |                      |
| <u>Exposure estimates</u>                                                                  | <u>% of AOEL</u>     |
| <b><u>EUROPOEM II :</u></b>                                                                |                      |
| Bystander ( <i>adults</i> )                                                                | 9.7                  |
| <b><u>Martin et al. (2008):</u></b>                                                        |                      |
| Bystander                                                                                  |                      |
| <i>Adults</i>                                                                              | 8.5                  |
| <i>Child</i>                                                                               | 6.7                  |
| Resident ( <i>worst case: 8 applications, 7 days interval</i> )                            |                      |
| <i>Adults</i>                                                                              | 1.6                  |
| <i>Child</i>                                                                               | 3.2                  |
| <b><u>EFSA model:</u></b>                                                                  |                      |
| <i>Bystander</i>                                                                           | <i>not necessary</i> |
| Resident (sum) :                                                                           |                      |
| <i>8 applications, 7 days interval</i>                                                     |                      |
| <i>Child</i>                                                                               | 171                  |
| <i>Adult</i>                                                                               | 93                   |
| <i>3 applications, 21 days interval</i>                                                    |                      |
| <i>Child</i>                                                                               | 154                  |
| <i>Adult</i>                                                                               | 84                   |
| <u>Use: tomato, cucurbits (0.85 kg as/ha,outdoor, refined DT<sub>50</sub> of 7 days)</u>   |                      |
| <b><u>EFSA model:</u></b>                                                                  |                      |
| <i>Bystander</i>                                                                           | <i>not necessary</i> |
| Resident (sum)                                                                             |                      |
| <i>8 applications, 7 days interval</i>                                                     |                      |
| <i>Child</i>                                                                               | 33                   |
| <i>Adult</i>                                                                               | 16                   |

### Classification with regard to toxicological data (Regulation (EU) N° 283/2013, Annex Part A, Section 10)

Substance :

Harmonised classification according to Regulation (EC) No 1272/2008<sup>5</sup> and its Adaptations to Technical Process [Table 3.1 of Annex VI of Regulation (EC) No 1272/2008 as amended]<sup>6</sup> :

|                                                        |
|--------------------------------------------------------|
| Copper hydroxide                                       |
| Acute oral Cat. 4; H302: Harmful if swallowed          |
| Acute inhalation Cat. 2; H330: Fatal if inhaled        |
| Eye irritation Cat. 1; H318: Causes serious eye damage |

<sup>5</sup> Regulation (EC) No 1272/2008 of the European Parliament and of the Council of 16 December 2008 on classification, labelling and packaging of substances and mixtures, amending and repealing Directives 67/548/EEC and 1999/45/EC, and amending Regulation (EC) No 1907/2006. OJ L 353, 31.12.2008, 1-1355.

<sup>6</sup> Commission Regulation (EU) 2016/1179 of 19 July 2016 amending, for the purposes of its adaptation to technical and scientific progress, Regulation (EC) No 1272/2008 of the European Parliament and of the Council on classification, labelling and packaging of substances and mixtures. OJ L 195, 20.7.2016, 11-25.



Peer review proposal <sup>7</sup> for harmonised classification according to Regulation (EC) No 1272/2008:

Agree with above

Substance :

Copper oxychloride

Harmonised classification according to Regulation (EC) No 1272/2008 and its Adaptations to Technical Process [Table 3.1 of Annex VI of Regulation (EC) No 1272/2008 as amended] :

Acute oral Cat. 3; H301: Toxic if swallowed  
Acute inhalation Cat. 4; H332: Harmful if inhaled

Peer review proposal for harmonised classification according to Regulation (EC) No 1272/2008:

Agree with above

Substance :

Bordeaux mixture

Harmonised classification according to Regulation (EC) No 1272/2008 and its Adaptations to Technical Process [Table 3.1 of Annex VI of Regulation (EC) No 1272/2008 as amended] :

Acute inhalation Cat. 4; H332: Harmful if inhaled  
Eye irritation Cat. 1; H318: Causes serious eye damage

Peer review proposal for harmonised classification according to Regulation (EC) No 1272/2008:

Agree with above

Substance :

Tribasic copper sulphate

Harmonised classification according to Regulation (EC) No 1272/2008 and its Adaptations to Technical Process [Table 3.1 of Annex VI of Regulation (EC) No 1272/2008 as amended] :

Acute oral Cat. 4; H302: Harmful if swallowed

Peer review proposal for harmonised classification according to Regulation (EC) No 1272/2008:

Agree with above

Substance :

Copper oxide

Harmonised classification according to Regulation (EC) No 1272/2008 and its Adaptations to Technical Process [Table 3.1 of Annex VI of Regulation (EC) No 1272/2008 as amended] :

Acute oral Cat. 4; H302: Harmful if swallowed  
Acute inhalation Cat. 4; H332: Harmful if inhaled  
Eye irritation Cat. 1; H318: Causes serious eye damage

Peer review proposal for harmonised classification according to Regulation (EC) No 1272/2008:

Agree with above

<sup>7</sup> It should be noted that harmonised classification and labelling is formally proposed and decided in accordance with Regulation (EC) No 1272/2008.

## Residues in or on treated products food and feed

### Metabolism in plants (Regulation (EU) N° 283/2013, Annex Part A, points 6.2.1, 6.5.1, 6.6.1 and 6.7.1)

|                                                                                                     |                                                                                                                                    |                                                                                                                                            |                       |                                                                                                                                    |
|-----------------------------------------------------------------------------------------------------|------------------------------------------------------------------------------------------------------------------------------------|--------------------------------------------------------------------------------------------------------------------------------------------|-----------------------|------------------------------------------------------------------------------------------------------------------------------------|
| <b>Primary crops</b><br>(Plant groups covered)<br><b>OECD Guideline 501</b>                         | <b>Crop groups</b>                                                                                                                 | <b>Crop(s)</b>                                                                                                                             | <b>Application(s)</b> | <b>DAT (days)</b>                                                                                                                  |
|                                                                                                     | Copper is a monoatomic element and inherently stable. Therefore, it is not expected to metabolise or to form degradation products. |                                                                                                                                            |                       |                                                                                                                                    |
| <b>Rotational crops</b><br>(metabolic pattern)<br><b>OECD Guideline 502</b>                         | <b>Crop groups</b>                                                                                                                 | <b>Crop(s)</b>                                                                                                                             | <b>PBI (days)</b>     | <b>Comments</b>                                                                                                                    |
|                                                                                                     | -                                                                                                                                  | -                                                                                                                                          | -                     | Copper is a monoatomic element and inherently stable. Therefore, it is not expected to metabolise or to form degradation products. |
|                                                                                                     | Rotational crop and primary crop metabolism similar?                                                                               | Yes                                                                                                                                        |                       |                                                                                                                                    |
| <b>Processed commodities</b><br>(standard hydrolysis study)<br><b>OECD Guideline 507</b>            | <b>Conditions</b>                                                                                                                  |                                                                                                                                            |                       |                                                                                                                                    |
|                                                                                                     | 20 min, 90°C, pH 4                                                                                                                 | -                                                                                                                                          | -                     | -                                                                                                                                  |
|                                                                                                     | 60 min, 100°C, pH 5                                                                                                                | -                                                                                                                                          | -                     | -                                                                                                                                  |
|                                                                                                     | 20 min, 120°C, pH 6                                                                                                                | -                                                                                                                                          | -                     | -                                                                                                                                  |
|                                                                                                     | Residue pattern in processed commodities similar to residue pattern in raw commodities?                                            | Yes.<br>Copper is a monoatomic element and inherently stable. Therefore, it is not expected to metabolise or to form degradation products. |                       |                                                                                                                                    |
| Plant residue definition for monitoring (RD-Mo)<br><b>OECD Guidance, series on pesticides No 31</b> | total copper                                                                                                                       |                                                                                                                                            |                       |                                                                                                                                    |
| Plant residue definition for risk assessment (RD-RA)                                                | total copper                                                                                                                       |                                                                                                                                            |                       |                                                                                                                                    |
| Conversion factor (monitoring to risk assessment)                                                   | None                                                                                                                               |                                                                                                                                            |                       |                                                                                                                                    |

### Metabolism in livestock (Regulation (EU) N° 283/2013, Annex Part A, points 6.2.2, 6.2.3, 6.2.4, 6.2.5 6.7.1)

Copper is a monoatomic element and inherently stable. Therefore, it is not expected to metabolise or to form degradation products.

**Residues in succeeding crops (Regulation (EU) N° 283/2013, Annex Part A, point 6.6.2)****Confined rotational crop study**

(Quantitative aspect)

[OECD Guideline 502](#)

No study available and not required.

**Field rotational crop study**[OECD Guideline 504](#)

No study available and not required.

As copper is an essential micronutrient for plants and it is assumed that copper uptake in succeeding crop is auto regulated by the crops. Therefore, the survey on the endogenous copper levels in all plant commodities was considered as a surrogate to rotational crops studies.

These data could allow deriving risk assessment values for all plant commodities.

**Stability of residues (Regulation (EU) N° 283/2013, Annex Part A, point 6.1)**  
**OECD Guideline 506**

Since copper cannot degrade and since the analytical techniques measure total copper content, storage stability studies are not required.

**Summary of residues data from the supervised residue trials (Regulation (EU) N° 283/2013, Annex Part A, point 6.3) OECD Guideline 509, OECD Guidance, series on pesticides No 66 and OECD MRL calculator**

| Crop                            | Region/<br>Indoor<br>(a) | Residue levels (mg/kg) observed in the supervised<br>residue trials relevant to the supported GAPs<br>(b) | Recommendations/comments<br>(OECD calculations)                                                                                                       | MRL<br>proposals<br>(mg/kg) | HR<br>(mg/kg)<br>(c) | STMR<br>(mg/kg)<br>(d) |
|---------------------------------|--------------------------|-----------------------------------------------------------------------------------------------------------|-------------------------------------------------------------------------------------------------------------------------------------------------------|-----------------------------|----------------------|------------------------|
| <b>Representative uses</b>      |                          |                                                                                                           |                                                                                                                                                       |                             |                      |                        |
| Grapes (wine<br>and table)      | NEU                      | 0.40; 0.79; 0.83; 0.94; 0.97; 1.1; 1.15; 3x 1.2; 1.27; 3x 1.5                                             | MRL derived from endogenous levels (to support the “vegetative growth stage” GAP). Residue trials are required to support the “no residue situation”. | 2                           | 1.5                  | 1.15                   |
|                                 | NEU                      | -                                                                                                         | No trials compliant with GAPs for post-flowering application.                                                                                         | -                           | -                    | -                      |
|                                 | SEU                      | 0.40; 0.79; 0.83; 0.94; 0.97; 1.1; 1.15; 3x 1.2; 1.27; 3x 1.5                                             | MRL derived from endogenous levels (to support the “vegetative growth stage” GAP). Residue trials are required to support the “no residue situation”. | 2                           | 1.5                  | 1.15                   |
|                                 | SEU                      | -                                                                                                         | No trials compliant with GAPs for post-flowering application.                                                                                         | -                           | -                    | -                      |
| Tomatoes                        | NEU                      | -                                                                                                         | No trials compliant with GAP.                                                                                                                         | -                           | -                    | -                      |
|                                 | SEU                      | -                                                                                                         | No trials compliant with GAP.                                                                                                                         | -                           | -                    | -                      |
|                                 | Indoor                   | -                                                                                                         | No trials compliant with GAP.                                                                                                                         | -                           | -                    | -                      |
| Cucurbits with<br>edible peel   | NEU                      | -                                                                                                         | No trials compliant with GAP.                                                                                                                         | -                           | -                    | -                      |
|                                 | SEU                      | -                                                                                                         | No trials compliant with GAP.                                                                                                                         | -                           | -                    | -                      |
|                                 | Indoor                   | -                                                                                                         | No trials compliant with GAP.                                                                                                                         | -                           | -                    | -                      |
| Cucurbits with<br>inedible peel | NEU                      | -                                                                                                         | No trials compliant with GAP.                                                                                                                         | -                           | -                    | -                      |
|                                 | SEU                      | -                                                                                                         | No trials compliant with GAP.                                                                                                                         | -                           | -                    | -                      |
|                                 | Indoor                   | <1.97; 2x <2.0; 2x <2.1; 5.0                                                                              | 6 trials compliant with GAP. 2 trials in are still required in post-approval.<br>MRL <sub>OECD</sub> = 8                                              | 8                           | 5.0                  | 2.05                   |
| <b>MRL application</b>          |                          |                                                                                                           |                                                                                                                                                       |                             |                      |                        |
| Not relevant.                   |                          |                                                                                                           |                                                                                                                                                       |                             |                      |                        |

| Crop                                                                                                                    | Region/<br>Indoor<br>(a) | Residue levels (mg/kg) observed in the supervised<br>residue trials relevant to the supported GAPs<br>(b) | Recommendations/comments<br>(OECD calculations) | MRL<br>proposals<br>(mg/kg) | HR<br>(mg/kg)<br>(c) | STMR<br>(mg/kg)<br>(d) |
|-------------------------------------------------------------------------------------------------------------------------|--------------------------|-----------------------------------------------------------------------------------------------------------|-------------------------------------------------|-----------------------------|----------------------|------------------------|
| <b>Summary of the data on formulation equivalence <a href="#">OECD Guideline 509</a></b>                                |                          |                                                                                                           |                                                 |                             |                      |                        |
| Crop                                                                                                                    | Region                   | Residue data (mg/kg)                                                                                      | Recommendations/comments                        |                             |                      |                        |
| Not provided and not requested.                                                                                         |                          |                                                                                                           |                                                 |                             |                      |                        |
| <b>Summary of data on residues in pollen and bee products</b> (Regulation (EU) No 283/2013, Annex Part A, point 6.10.1) |                          |                                                                                                           |                                                 |                             |                      |                        |
| Still required.                                                                                                         |                          |                                                                                                           |                                                 |                             |                      |                        |

- (a): **NEU** or **SEU** for northern or southern **outdoor** trials in EU member states (**N+SEU** if both zones), **Indoor** for glasshouse/protected crops, **Country** if non-EU location.
- (b): Residue levels in trials conducted according to GAP reported in ascending order (*e.g.* 3x <0.01, 0.01, 6x 0.02, 0.04, 0.08, 3x 0.10, 2x 0.15, 0.17). When residue definition for monitoring and risk assessment differs, use **Mo/RA** to differentiate data expressed according to the residue definition for **Monitoring** and **Risk Assessment**.
- (c): **HR**: Highest residue. When residue definition for monitoring and risk assessment differs, HR according to residue definition for monitoring reported in brackets (HR<sub>Mo</sub>).
- (d): **STMR**: Supervised Trials Median Residue. When residue definition for monitoring and risk assessment differs, STMR according to definition for monitoring reported in brackets (STMR<sub>Mo</sub>).

### Inputs for animal burden calculations

| Feed commodity             | Median dietary burden |         | Maximum dietary burden |         |
|----------------------------|-----------------------|---------|------------------------|---------|
|                            | (mg/kg)               | Comment | (mg/kg)                | Comment |
| <b>Representative uses</b> |                       |         |                        |         |
| Not relevant               | -                     | -       | -                      | -       |
| <b>MRL application</b>     |                       |         |                        |         |
| Not relevant               | -                     | -       | -                      | -       |

**Residues from livestock feeding studies (Regulation (EU) N° 283/2013, Annex Part A, points 6.4.1, 6.4.2, 6.4.3 and 6.4.4)**

**OECD Guideline 505 and OECD Guidance, series on pesticides No 73**

Not relevant



## Conversion Factors (CF) for monitoring to risk assessment

Not relevant.

### Processing factors (Regulation (EU) N° 283/2013, Annex Part A, points 6.5.2 and 6.5.3)

#### OECD Guideline 508 and OECD Guidance, series on testing and assessment No 96

| Crop (RAC)/Edible part or<br>Crop (RAC)/Processed product | Number<br>of<br>studies <sup>(a)</sup> | Processing Factor (PF)                                                                         |                  | Conversion<br>Factor (CF <sub>P</sub> )<br>for RA <sup>(b)</sup> |
|-----------------------------------------------------------|----------------------------------------|------------------------------------------------------------------------------------------------|------------------|------------------------------------------------------------------|
|                                                           |                                        | Individual values                                                                              | Median PF        |                                                                  |
| <b>Representative uses</b>                                |                                        |                                                                                                |                  |                                                                  |
| Cucurbit, inedible peel: distribution between peel-pulp   | 5                                      | 0.14; 0.28; 0.42; 0.46; 0.92                                                                   | 0.42             | /                                                                |
| Tomatoes, washed fruit                                    | 2                                      | <0.74; <1                                                                                      | <0.87            | /                                                                |
| Tomatoes, juice                                           | 3                                      | <4.44; <5.71; <6                                                                               | - <sup>(c)</sup> | /                                                                |
| Tomatoes, canned fruit                                    | 3                                      | <0.74; <0.95; <1                                                                               | <0.95            | /                                                                |
| Wine grape, must                                          | 14                                     | 0.4; 2x 0.6; 2x 0.7; <0.8; 0.8; 0.9; 1.5; 1.8; 1.9; 2.5; 2.9; 4.7                              | 0.85             | /                                                                |
| Wine grape, juice                                         | 9                                      | 0.10; <0.15; 0.17; <0.21; <0.39; 0.42; 0.54; 0.65; 0.70                                        | 0.39             | /                                                                |
| Wine grape, wine*                                         | 19                                     | 5x <0.01; 0.02; 2x 0.03; <0.03; <0.04; <0.07; 0.20; <0.33; <0.46; <0.55; 2x <0.6; <0.76; <0.78 | 0.04             | /                                                                |
| Wine grape, wet pomace                                    | 6                                      | 0.8; 1.0; 2x 1.2; 6.1; 6.8                                                                     | 1.2              | /                                                                |
| Table grape, raisins                                      | 3                                      | 2.6; 2.6; 2.9                                                                                  | 2.6              | /                                                                |
| Cucumber, washed                                          | 4                                      | 0.40; 0.71; 0.82; 0.83                                                                         | 0.76             | /                                                                |
| <b>MRL application</b>                                    |                                        |                                                                                                |                  |                                                                  |
| Not relevant                                              | -                                      | -                                                                                              | -                | -                                                                |

<sup>(a)</sup>: Studies with residues in the RAC at or close to the LOQ should be disregarded (unless concentration)

<sup>(b)</sup>: When the residue definition for risk assessment differs from the residue definition for monitoring

<sup>(c)</sup>: A processing factor should not be derived for this commodity because the reported values are artificially high due to the high LOQ of the analytical method used for processed commodities.

\* Referred to as wine or bottle wine in reports; does not include young wine.

## Consumer risk assessment (Regulation (EU) N° 283/2013, Annex Part A, point 6.9)

### Consumer risk assessment limited to the representative uses

|                                               |                                                          |
|-----------------------------------------------|----------------------------------------------------------|
| <b>ADI</b>                                    | 0.15 mg/kg bw per day                                    |
| TMDI (% ADI), according to EFSA PRIMo         | Highest TMDI: 9.4 % ADI (WHO Cluster diet B)             |
| NTMDI (% ADI), according to (to be specified) | Not provided, not required.                              |
| IEDI (% ADI), according to EFSA PRIMo         | Highest IEDI: 3.5 % ADI (FR all population)              |
| NEDI (% ADI), according to (to be specified)  | 0.15 mg/kg bw per day                                    |
| Factors included in the calculations          | Peeling factor of 0.42 for cucurbits with inedible peel. |
| <b>ARfD</b>                                   | Not relevant.                                            |
| IESTI (% ARfD, according to EFSA PRIMo)       | Not applicable.                                          |
| NESTI (% ARfD, according to (to be specified) | Not applicable.                                          |
| Factors included in IESTI and NESTI           | Not applicable.                                          |

### Consumer risk assessment including endogenous levels of copper, representative uses and

**exposure via water.****ADI**

TMDI (% ADI), according to EFSA PRIMo

NTMDI (% ADI), according to (to be specified)

IEDI (% ADI), according to EFSA PRIMo

NEDI (% ADI), according to (to be specified)

Factors included in the calculations

**ARfD**

IESTI (% ARfD, according to EFSA PRIMo)

NESTI (% ARfD, according to (to be specified)

Factors included in IESTI and NESTI

0.15 mg/kg bw per day

Not relevant.

Not provided, not required.

Highest IEDI (considering commodities of plant and animal origin): 72.3 % ADI (WHO Cluster diet B)

IEDI (considering tap water – median and average occurrence data): 0.62-15.1% ADI

IEDI (considering water and water-based products – average occurrence data): 5.4% ADI

Not provided, not required.

Peeling factor of 0.42 for cucurbits with inedible peel.

Not relevant.

Not applicable.

Not applicable.

Not applicable.

**Proposed MRLs (Regulation (EU) No 283/2013, Annex Part A, points 6.7.2 and 6.7.3)**

| Code <sup>(a)</sup>        | Commodity/Group              | MRL/Import tolerance <sup>(b)</sup> ( mg/kg) and Comments |                                                                                       |
|----------------------------|------------------------------|-----------------------------------------------------------|---------------------------------------------------------------------------------------|
| <b>Plant commodities</b>   |                              |                                                           |                                                                                       |
| <b>Representative uses</b> |                              |                                                           |                                                                                       |
| 0151000                    | Table and wine-grapes        | 2                                                         | Based on endogenous levels. Trials are required to confirm the “no residue situation. |
| 0233000                    | Cucurbits with inedible peel | 8                                                         | Provisional/tentative MRL: 2 trials are missing.                                      |

(a): Commodity code number, as listed in Annex I of Regulation (EC) No 396/2005

(b): MRLs proposed at the LOQ, should be annotated by an asterisk (\*) after the figure.

## Environmental fate and behaviour

### Route of degradation (aerobic) in soil (Regulation (EU) N° 283/2013, Annex Part A, point 7.1.1.1)

Mineralisation after 100 days  
 Non-extractable residues after 100 days  
 Metabolites requiring further consideration  
 - name and/or code, % of applied (range and maximum)

Not applicable to inorganic salts.

### Route of degradation (anaerobic) in soil (Regulation (EU) N° 283/2013, Annex Part A, point 7.1.1.2)

Mineralisation after 100 days  
 Non-extractable residues after 100 days  
 Metabolites that may require further consideration  
 for risk assessment - name and/or code, % of  
 applied (range and maximum)

Not applicable to inorganic salts.

### Route of degradation (photolysis) on soil (Regulation (EU) N° 283/2013, Annex Part A, point 7.1.1.3)

Metabolites that may require further consideration  
 for risk assessment - name and/or code, % of  
 applied (range and maximum)  
 Mineralisation at study end  
 Non-extractable residues at study end

Not applicable to inorganic salts.

### Rate of degradation in soil (aerobic) laboratory studies active substance (Regulation (EU) N° 283/2013, Annex Part A, point 7.1.2.1.1 and Regulation (EU) N° 284/2013, Annex Part A, point 9.1.1.1)

| Parent                                                                                                                                                                                                                                                                                                                                 | Dark aerobic conditions |    |                |                                           |                                                         |                     |                          |
|----------------------------------------------------------------------------------------------------------------------------------------------------------------------------------------------------------------------------------------------------------------------------------------------------------------------------------------|-------------------------|----|----------------|-------------------------------------------|---------------------------------------------------------|---------------------|--------------------------|
| Soil type                                                                                                                                                                                                                                                                                                                              | X <sup>8</sup>          | pH | t. °C / % MWHC | DT <sub>50</sub> /DT <sub>90</sub><br>(d) | DT <sub>50</sub> (d)<br>20 °C<br>pF2/10kPa <sup>b</sup> | St.<br>( $\chi^2$ ) | Method of<br>calculation |
| No degradation is expected. Transformation of the free soluble ion in different complexed species is expected according available published literature. However, no quantitative estimation of the rate of these processes is available. Ecotoxicological significance of availability of the different possible species is not known. |                         |    |                |                                           |                                                         |                     |                          |

<sup>8</sup> X This column is reserved for any other property that is considered to have a particular impact on the degradation rate. Column and this footnote may be removed if not used.

**Rate of degradation field soil dissipation studies (Regulation (EU) N° 283/2013, Annex Part A, point 7.1.2.2.1 and Regulation (EU) N° 284/2013, Annex Part A, point 9.1.1.2.1)**

| Parent                                                                                                                                                                                                                                                                                                                                 | Aerobic conditions               |                |    |            |                             |                             |                  |                                           |                       |
|----------------------------------------------------------------------------------------------------------------------------------------------------------------------------------------------------------------------------------------------------------------------------------------------------------------------------------------|----------------------------------|----------------|----|------------|-----------------------------|-----------------------------|------------------|-------------------------------------------|-----------------------|
| Soil type (indicate if bare or cropped soil was used).                                                                                                                                                                                                                                                                                 | Location (country or USA state). | X <sup>o</sup> | pH | Depth (cm) | DT <sub>50</sub> (d) actual | DT <sub>90</sub> (d) actual | St. ( $\chi^2$ ) | DT <sub>50</sub> (d) Norm <sup>b)</sup> . | Method of calculation |
| No degradation is expected. Transformation of the free soluble ion in different complexed species is expected according available published literature. However, no quantitative estimation of the rate of these processes is available. Ecotoxicological significance of availability of the different possible species is not known. |                                  |                |    |            |                             |                             |                  |                                           |                       |

**Combined laboratory and field kinetic endpoints for modelling (when not from different populations)\***

Rate of degradation in soil active substance, normalised geometric mean (if not pH dependent)

Rate of degradation in soil transformation products, normalised geometric mean (if not pH dependent)

Kinetic formation fraction (f. f.  $k_f / k_{dp}$ ) of transformation products, arithmetic mean

Not applicable to inorganic salts.

**Soil accumulation (Regulation (EU) N° 283/2013, Annex Part A, point 7.1.2.2.2 and Regulation (EU) N° 284/2013, Annex Part A, point 9.1.1.2.2)**

Soil accumulation and plateau concentration

Plateau concentration calculations are reported related to the intended uses (see below).

A review of European monitoring programs was used to identify levels of copper present in soil from natural or anthropogenic sources other than the regulated use for the soil exposure assessments. The values suitable for use in soil exposure assessments are summarised below.

<sup>13</sup> X This column is reserved for any other property that is considered to have a particular impact on the degradation rate. Column and this footnote may be removed if not used.

<sup>13</sup> X This column is reserved for any other property that is considered to have a particular impact on the degradation rate.<sup>14</sup> Regulation (EC) No 1272/2008 of the European Parliament and of the Council of 16 December 2008 on classification, labelling and packaging of substances and mixtures, amending and repealing Directives 67/548/EEC and 1999/45/EC, and amending Regulation (EC) No 1907/2006. OJ L 353, 31.12.2008, 1-1355.

| Soil                          | Soil concentration<br>(mg Cu/kg soil DM) |                                                  |
|-------------------------------|------------------------------------------|--------------------------------------------------|
| Background level<br>Vineyards | 28                                       | Overall median 10 <sup>th</sup> percentile value |
|                               | 72                                       | Overall median value                             |
|                               | 160                                      | Overall median 90 <sup>th</sup> percentile value |
|                               | 67                                       | Overall mean value                               |
| Arable fields                 | 32                                       | EFSA (2013)                                      |
|                               | 7                                        | Overall median 10 <sup>th</sup> percentile value |
|                               | 13                                       | Overall median value                             |
|                               | 26                                       | Overall median 90 <sup>th</sup> percentile value |
|                               | 15                                       | Overall mean value                               |
| Orchards                      | -                                        | Overall median 10 <sup>th</sup> percentile value |
|                               | 48.3                                     | Overall median value                             |
|                               | 58                                       | Overall median 90 <sup>th</sup> percentile value |
|                               | 22                                       | Overall mean value                               |

**Rate of degradation in soil (anaerobic) laboratory studies active substance (Regulation (EU) N° 283/2013, Annex Part A, point 7.1.2.1.3 and Regulation (EU) N° 284/2013, Annex Part A, point 9.1.1.1)**

| Parent                                                                                                                                                                                                                                                                                                                                 | Dark anaerobic conditions |                  |                |                                            |                                             |                          |                       |
|----------------------------------------------------------------------------------------------------------------------------------------------------------------------------------------------------------------------------------------------------------------------------------------------------------------------------------------|---------------------------|------------------|----------------|--------------------------------------------|---------------------------------------------|--------------------------|-----------------------|
| Soil type                                                                                                                                                                                                                                                                                                                              | X <sup>10</sup>           | pH <sup>a)</sup> | t. °C / % MWHC | DT <sub>50</sub> / DT <sub>90</sub><br>(d) | DT <sub>50</sub> (d)<br>20 °C <sup>b)</sup> | St.<br>(χ <sup>2</sup> ) | Method of calculation |
| No degradation is expected. Transformation of the free soluble ion in different complexed species is expected according available published literature. However, no quantitative estimation of the rate of these processes is available. Ecotoxicological significance of availability of the different possible species is not known. |                           |                  |                |                                            |                                             |                          |                       |

**Rate of degradation on soil (photolysis) laboratory active substance (Regulation (EU) N° 283/2013, Annex Part A, point 7.1.1.3)**

| Parent                                                                                                                                                                                                                                                                                                                                 | Soil photolysis |    |                |                                                               |                          |                       |
|----------------------------------------------------------------------------------------------------------------------------------------------------------------------------------------------------------------------------------------------------------------------------------------------------------------------------------------|-----------------|----|----------------|---------------------------------------------------------------|--------------------------|-----------------------|
| Soil type                                                                                                                                                                                                                                                                                                                              | X <sup>11</sup> | pH | t. °C / % MWHC | DT <sub>50</sub> / DT <sub>90</sub> (d)<br>calculated at ??°N | St.<br>(χ <sup>2</sup> ) | Method of calculation |
| No degradation is expected. Transformation of the free soluble ion in different complexed species is expected according available published literature. However, no quantitative estimation of the rate of these processes is available. Ecotoxicological significance of availability of the different possible species is not known. |                 |    |                |                                                               |                          |                       |

<sup>13</sup> X This column is reserved for any other property that is considered to have a particular impact on the degradation rate. <sup>14</sup> Regulation (EC) No 1272/2008 of the European Parliament and of the Council of 16 December 2008 on classification, labelling and packaging of substances and mixtures, amending and repealing Directives 67/548/EEC and 1999/45/EC, and amending Regulation (EC) No 1907/2006. OJ L 353, 31.12.2008, 1-1355. nt and of the Council on classification, labelling and packaging of substances and mixtures. OJ L 195, 20.7.2016, 11-25.

**Soil adsorption active substance (Regulation (EU) N° 283/2013, Annex Part A, point 7.1.3.1.1 and Regulation (EU) N° 284/2013, Annex Part A, point 9.1.2.1)**

| Parent                                                            |          |                       |                          |                                              |                          |                            |     |
|-------------------------------------------------------------------|----------|-----------------------|--------------------------|----------------------------------------------|--------------------------|----------------------------|-----|
| Soil Type                                                         | OC %     | Soil pH <sup>a)</sup> | K <sub>d</sub><br>(mL/g) | K <sub>doc</sub><br>(mL/g)                   | K <sub>F</sub><br>(mL/g) | K <sub>Foc</sub><br>(mL/g) | 1/n |
| 494 topsoil samples from arable land and grass land across Europe | 0.5-48.0 | 3.28-4.00             | -                        | 2300.0-35202.4                               | -                        | -                          | -   |
|                                                                   | 0.6-49.0 | 4.01-4.99             | -                        | 908.7-337000                                 | -                        | -                          | -   |
|                                                                   | 0.7-36.0 | 5.08-5.48             | -                        | 1727.8-505444.4                              | -                        | -                          | -   |
|                                                                   | 0.5-42.0 | 5.53-6.50             | -                        | 350.0-430400.0                               | -                        | -                          | -   |
|                                                                   | 0.5-22.0 | 6.51-7.98             | -                        | 5163.3-1062833.3                             | -                        | -                          | -   |
| Median value (if not pH dependent)                                |          |                       | -                        | -                                            | -                        | -                          | -   |
| Geometric mean (if not pH dependent) <sup>‡</sup>                 |          |                       | -                        | pH 4-5:<br>19509.9<br>pH 5.5-6.5:<br>33918.3 | -                        | -                          | -   |
| Arithmetic mean (if not pH dependent)                             |          |                       | -                        | -                                            | -                        | -                          | -   |
| pH dependence, <i>Yes or No</i>                                   |          |                       | -Yes                     |                                              |                          |                            |     |

<sup>a)</sup> Measured in CaCl<sub>2</sub>

**Mobility in soil column leaching active substance (Regulation (EU) N° 283/2013, Annex Part A, point 7.1.4.1.1 and Regulation (EU) N° 284/2013, Annex Part A, point 9.1.2.1)**

Column leaching

Elution (mm): 300 mm  
 Time period (d): 2 d  
 Copper was applied to soil columns containing Speyer 2.2, 2.3 and 3L and Leipzig standard soils at a rate equivalent to ca 18 kg copper/ha.  
 Leachate: 1 % total residues/radioactivity in leachate  
 ≈ 99 % total residues retained in top 6 cm

Elution (mm): 370-380  
 Time period (d): 2  
 Copper was applied to soil columns containing Speyer 2.1, 2.2 and 2.3 standard soils at a rate equivalent to 1 kg/ha.  
 Levels of copper detected in the leachate, after correction for the amounts present in control samples, did not exceed 0.01 mg/L.

Aged residues leaching

No study submitted

**Lysimeter / field leaching studies (Regulation (EU) N° 283/2013, Annex Part A, points 7.1.4.2 / 7.1.4.3 and Regulation (EU) N° 284/2013, Annex Part A, points 9.1.2.2 / 9.1.2.3)**

Lysimeter/ field leaching studies

No valid study

A review of the existing monitoring programmes and published literature on copper levels in groundwater has been conducted.

Generally natural levels of copper in groundwater were low, with background concentrations ranging from <0.63 to 25 µg/L, with the exception of volcanic aquifers. In the upper soil layers, typical copper concentrations in soil water and leachate from field leaching and lysimeter studies ranged from 1 to 90 µg/L, with a peak concentration of 164.2 µg/L detected at a depth of 25 cm. A review of copper levels in groundwater aquifers with possible anthropogenic inputs detected a range of concentrations from <LOD to 39 µg/L, with a peak concentration of 90 µg/L. Typical concentrations in ranged from < 0.1 to 18 µg/L which is within the range of natural background levels.

Copper concentrations never approach the legal limit of 2 mg/L set by the European Drinking Water Directive (98/83/EC7) for groundwater.

**Hydrolytic degradation (Regulation (EU) N° 283/2013, Annex Part A, point 7.2.1.1)**

Hydrolytic degradation of the active substance and metabolites &gt; 10 %

Not relevant

Aqueous photochemical degradation (Regulation (EU) N° 283/2013, Annex Part A, points 7.2.1.2 / 7.2.1.3) Photolytic degradation of active substance and metabolites above 10 %

Not relevant

Quantum yield of direct phototransformation in water at  $\Sigma > 290$  nm

Not relevant

### 'Ready biodegradability' (Regulation (EU) N° 283/2013, Annex Part A, point 7.2.2.1)

Readily biodegradable (yes/no)

No data submitted, substance considered not readily biodegradable

### Aerobic mineralisation in surface water (Regulation (EU) N° 283/2013, Annex Part A, point 7.2.2.2 and Regulation (EU) N° 284/2013, Annex Part A, point 9.2.1)

| Parent                                                  |                |        |       |                                                                                |                    |                  |                                                                |                    |                  |                       |
|---------------------------------------------------------|----------------|--------|-------|--------------------------------------------------------------------------------|--------------------|------------------|----------------------------------------------------------------|--------------------|------------------|-----------------------|
| System identifier (indicate fresh, estuarine or marine) | pH water phase | pH sed | t. °C | DissT <sub>50</sub> / DissT <sub>90</sub> whole sys. (suspended sediment test) |                    | St. ( $\chi^2$ ) | DissT <sub>50</sub> / DissT <sub>90</sub> Water (pelagic test) |                    | St. ( $\chi^2$ ) | Method of calculation |
|                                                         |                |        |       | At study temp                                                                  | Normalised to x °C |                  | At study temp                                                  | Normalised to x °C |                  |                       |
| Not studied. No degradation is expected.                |                |        |       |                                                                                |                    |                  |                                                                |                    |                  |                       |

### Water / sediment study (Regulation (EU) N° 283/2013, Annex Part A, point 7.2.2.3 and Regulation (EU) N° 284/2013, Annex Part A, point 9.2.2)

| Total copper                   |                |                      |       |                                                      |                  |                                                 |                  |                                               |                  |                       |
|--------------------------------|----------------|----------------------|-------|------------------------------------------------------|------------------|-------------------------------------------------|------------------|-----------------------------------------------|------------------|-----------------------|
| Water / sediment system        | pH water phase | pH sed <sup>a)</sup> | t. °C | DissT <sub>50</sub> / DissT <sub>90</sub> whole sys. | St. ( $\chi^2$ ) | DissT <sub>50</sub> / DissT <sub>90</sub> Water | St. ( $\chi^2$ ) | DissT <sub>50</sub> / DissT <sub>90</sub> sed | St. ( $\chi^2$ ) | Method of calculation |
| Microcosm<br>2.5 µg total Cu/L | -              | -                    | -     | -                                                    | -                | -                                               | -                | -                                             | -                | -                     |
| Microcosm<br>12 µg total Cu/L  | -              | -                    | -     | -                                                    | -                | -                                               | -                | -                                             | -                | -                     |
| Microcosm<br>24 µg total Cu/L  | -              | -                    | -     | -                                                    | -                | 5-22 d<br>Geomean:<br>9.9 d (n=6)               | -                | -                                             | -                | SFO                   |
| Microcosm<br>120 µg total Cu/L | -              | -                    | -     | -                                                    | -                | 7-30.5 d<br>Geomean:<br>11.4 d (n=6)            | -                | -                                             | -                | SFO                   |



|                                      |   |   |   |   |   |                                   |   |   |   |     |
|--------------------------------------|---|---|---|---|---|-----------------------------------|---|---|---|-----|
| Microcosm<br>240 µg total<br>Cu/L    | - | - | - | - | - | 4-18 d<br>Geomean:<br>6.1 d (n=6) | - | - | - | SFO |
| Geometric mean at 20°C <sup>b)</sup> |   |   |   |   | - | 8.8 d                             | - | - | - | SFO |

**Water / sediment study (Regulation (EU) N° 283/2013, Annex Part A, point 7.2.2.3 and Regulation (EU) N° 284/2013, Annex Part A, point 9.2.2)**

| Dissolved copper                     |                |                      |       |                                                     |                       |                                                |                       |                                              |                       |                       |
|--------------------------------------|----------------|----------------------|-------|-----------------------------------------------------|-----------------------|------------------------------------------------|-----------------------|----------------------------------------------|-----------------------|-----------------------|
| Water / sediment system              | pH water phase | pH sed <sup>a)</sup> | t. °C | DissT <sub>50</sub> /DissT <sub>90</sub> whole sys. | St. (χ <sup>2</sup> ) | DissT <sub>50</sub> /DissT <sub>90</sub> Water | St. (χ <sup>2</sup> ) | DissT <sub>50</sub> /DissT <sub>90</sub> sed | St. (χ <sup>2</sup> ) | Method of calculation |
| Microcosm<br>2.5 µg total Cu/L       | -              | -                    | -     | -                                                   | -                     | 5.48-8.87                                      | 4.15-25.2             | -                                            | -                     | SFO                   |
| Microcosm<br>12 µg total Cu/L        | -              | -                    | -     | -                                                   | -                     | 7.2-119                                        | 3.1-14.0              | -                                            | -                     | SFO                   |
| Microcosm<br>24 µg total Cu/L        | -              | -                    | -     | -                                                   | -                     | 3.32-22.3                                      | 4.83-19.5             | -                                            | -                     | SFO/FOMC              |
| Microcosm<br>120 µg total Cu/L       | -              | -                    | -     | -                                                   | -                     | 3.42-26.8                                      | 2.93-23.8             | -                                            | -                     | SFO                   |
| Microcosm<br>240 µg total Cu/L       | -              | -                    | -     | -                                                   | -                     | 3.1-7.77                                       | 3.98-28.3             | -                                            | -                     | SFO                   |
| Geometric mean at 20°C <sup>b)</sup> |                |                      |       |                                                     | -                     | 8.08(=27)                                      | -                     | -                                            | -                     | SFO                   |

| Cu <sup>2+</sup> ions                                       |                |                      |       |                                                     |                       |                                                |                       |                                              |                       |                       |
|-------------------------------------------------------------|----------------|----------------------|-------|-----------------------------------------------------|-----------------------|------------------------------------------------|-----------------------|----------------------------------------------|-----------------------|-----------------------|
| Water / sediment system                                     | pH water phase | pH sed <sup>a)</sup> | t. °C | DissT <sub>50</sub> /DissT <sub>90</sub> whole sys. | St. (χ <sup>2</sup> ) | DissT <sub>50</sub> /DissT <sub>90</sub> water | St. (χ <sup>2</sup> ) | DissT <sub>50</sub> /DissT <sub>90</sub> sed | St. (χ <sup>2</sup> ) | Method of calculation |
| Dissipation in water of Cu <sup>2+</sup> ions is very fast. |                |                      |       |                                                     |                       |                                                |                       |                                              |                       |                       |

<sup>a)</sup> Measured in [medium to be stated, usually calcium chloride solution or water]

<sup>b)</sup> Normalised using a Q10 of 2.58

| Mineralisation and non extractable residues (from parent dosed experiments) |                |        |                                                      |                                                    |                                                                       |
|-----------------------------------------------------------------------------|----------------|--------|------------------------------------------------------|----------------------------------------------------|-----------------------------------------------------------------------|
| Water / sediment system                                                     | pH water phase | pH sed | Mineralisation<br>x % after n d. (end of the study). | Non-extractable residues in sed. max x % after n d | Non-extractable residues in sed. max x % after n d (end of the study) |
| No degradation is expected.                                                 |                |        |                                                      |                                                    |                                                                       |

**Fate and behaviour in air (Regulation (EU) N° 283/2013, Annex Part A, point 7.3.1)**

Direct photolysis in air

Not studied - no data requested

Photochemical oxidative degradation in air

|                                                                      |
|----------------------------------------------------------------------|
| -                                                                    |
| from plant surfaces (BBA guideline): Not studied - no data requested |
| from soil surfaces (BBA guideline): Not studied - no data requested  |

Volatilisation

### Residues requiring further assessment (Regulation (EU) N° 283/2013, Annex Part A, point 7.4.1)

Environmental occurring residues requiring further assessment by other disciplines (toxicology and ecotoxicology) and or requiring consideration for groundwater exposure

|                |                                |
|----------------|--------------------------------|
| Soil:          | Total copper                   |
| Surface water: | Total copper, Dissolved copper |
| Sediment:      | Total copper                   |
| Ground water:  | Total copper                   |
| Air:           | none                           |

### Definition of the residue for monitoring (Regulation (EU) N° 283/2013, Annex Part A, point 7.4.2)

See section 5, Ecotoxicology

### Monitoring data, if available (Regulation (EU) N° 283/2013, Annex Part A, point 7.5)

Soil (indicate location and type of study)

|                                                                                                                                                                                                                                                                                                                                                                                                                                                                                                                                                                                                                                                                                                                                                                                |
|--------------------------------------------------------------------------------------------------------------------------------------------------------------------------------------------------------------------------------------------------------------------------------------------------------------------------------------------------------------------------------------------------------------------------------------------------------------------------------------------------------------------------------------------------------------------------------------------------------------------------------------------------------------------------------------------------------------------------------------------------------------------------------|
| <p>A small soil survey of 38 Belgium field sites was conducted between August and October 2013. The median soil concentration measured in treated plots was 52 mg total Cu/kg (range 9 to 159 mg Cu/kg). In soil from adjacent untreated areas, the median soil concentration was 16 mg total Cu/kg (range 5 to 87 mg Cu/kg), which is within the normal background range.</p>                                                                                                                                                                                                                                                                                                                                                                                                 |
| <p>A large soil monitoring programme was conducted in Austria to establish the amounts of copper in agricultural soils.</p> <p>No significant differences were found in the total copper concentrations measured in soil samples from organically and conventionally managed fields. The Austrian soil data showed highest copper loads in locations with a long-term history of viticulture. Soil copper levels were significantly lower in orchards with evidence of accumulation of copper was found in only ca. 5% of locations. In the majority of arable soils, copper concentrations were at the natural background level of up to 30 mg/kg. Only occasionally samples with higher copper contents were reported where vineyards had been converted to arable land.</p> |
| <p>A total of 85 vineyards were surveyed in Germany between 2009 and 2010 to determine copper contents of soils. The mean copper concentrations in the top 5 cm depth of soil was 121 mg/kg and 102 mg/kg in the top 20 cm. The levels of copper in vineyard soil varied greatly in different German viticulture regions. Historical records indicated high copper fungicide application rates of up to 50 kg Cu/ha from 1890 up to the 1940s have been applied in German vineyards, which was concluded</p>                                                                                                                                                                                                                                                                   |

|                                                     |                                                                                                                                                                                                                                                                                                                                                                                                                                                                                                                                                                                                                                                                             |
|-----------------------------------------------------|-----------------------------------------------------------------------------------------------------------------------------------------------------------------------------------------------------------------------------------------------------------------------------------------------------------------------------------------------------------------------------------------------------------------------------------------------------------------------------------------------------------------------------------------------------------------------------------------------------------------------------------------------------------------------------|
|                                                     | <p>to be the cause of the current high copper levels found in very long established vineyards. In vineyards cultivated over the last 25 years, total copper concentrations were less than 40 mg Cu/kg soil (DM).</p>                                                                                                                                                                                                                                                                                                                                                                                                                                                        |
|                                                     | <p>A review of the existing monitoring programmes and published literature on copper levels in European agricultural soils has been conducted, with the aim of identifying a concentration suitable for use in soil exposure assessments for various crops.</p> <p>The natural background level of copper proposed by EFSA of 32 mg/kg was found to be highly conservative, at more than double the median value of 11 mg/kg measured across Europe.</p> <p>No convincing evidence for accumulation of copper in arable fields was found, but elevated copper levels were observed in a proportion of vineyard soils and to a much lesser extent in some orchard soils.</p> |
| Surface water (indicate location and type of study) | <p>The European geological mapping project (FOREGS Geochemical Atlas of Europe) was used to obtain monitoring data for surface water and sediments. Dissolved copper concentrations in stream water range over two orders of magnitude, from 0.08 to 14.6 µg/L, with a median value of 0.88 µg/L. The median total copper concentration in stream sediments was 17 mg/kg, with a range from 1.0 to 877 mg/kg and in floodplain sediment varied from 2 to 495 mg/kg, with a median value of 17 mg/kg (according to analysis by XRF).</p>                                                                                                                                     |
| Ground water (indicate location and type of study)  | <p>A review of the existing monitoring programmes and published literature on copper levels in groundwater has been conducted. Copper concentrations never approach the legal limit of 2 mg/L set by the European Drinking Water Directive (98/83/EC7) for groundwater.</p>                                                                                                                                                                                                                                                                                                                                                                                                 |
| Air (indicate location and type of study)           | <p>Not applicable for copper</p>                                                                                                                                                                                                                                                                                                                                                                                                                                                                                                                                                                                                                                            |

**PEC soil (Regulation (EU) N° 284/2013, Annex Part A, points 9.1.3 / 9.3.1)**

**FUNUGURAN-OH, CURENOX 50, POTIGLIA CAFFARO DF New, CUPROXAT SC, NORDOX 75**

The different background values used for PECsoil calculations are reported in section ‘Soil accumulation (Regulation (EU) N° 283/2013, Annex Part A, point 7.1.2.2.2 and Regulation (EU) N° 284/2013, Annex Part A, point 9.1.1.2.2)’.

Parent  
Method of calculation

DT<sub>50</sub> (d): No degradation is expected.  
Kinetics: -  
Field or Lab: -

Application data

Crop: Grape  
 Depth of soil layer: 5 cm  
 Soil bulk density: 1.5 g/cm<sup>3</sup>  
 % plant interception: no crop interception  
 Number of applications: 1  
 Interval (d): -  
 Annual Application rate(s): 6000 g a.s./ha\* or 8000 g a.s./ha\*\* in any single year

\* Total must not exceed 6 kg/ha/yr

\*\* Total must not exceed 30 kg/ha any rolling 5 year period

| PEC <sub>(s)</sub><br>(mg/kg) | Single application                                                                                                                                                | Single application    | Multiple application                                          | Multiple application  |
|-------------------------------|-------------------------------------------------------------------------------------------------------------------------------------------------------------------|-----------------------|---------------------------------------------------------------|-----------------------|
|                               | Actual                                                                                                                                                            | Time weighted average | Actual                                                        | Time weighted average |
| Initial                       | -                                                                                                                                                                 |                       | 8.0 (for 6000 g a.s./ha/yr)<br>10.67 (for 8000 g a.s./ha/yr*) |                       |
| Short term                    | 24h                                                                                                                                                               | -                     | -                                                             | -                     |
|                               | 2d                                                                                                                                                                | -                     | -                                                             | -                     |
|                               | 4d                                                                                                                                                                | -                     | -                                                             | -                     |
| Long term                     | 7d                                                                                                                                                                | -                     | -                                                             | -                     |
|                               | 28d                                                                                                                                                               | -                     | -                                                             | -                     |
|                               | 50d                                                                                                                                                               | -                     | -                                                             | -                     |
|                               | 100d                                                                                                                                                              | -                     | -                                                             | -                     |
| Plateau concentration **      | Not reached<br><br>Background level<br>10 <sup>th</sup> centile: 108 mg/kg after 10 yr<br><br>Background level<br>90 <sup>th</sup> centile: 240 mg/kg after 10 yr |                       |                                                               |                       |

Parent

Method of calculation

DT<sub>50</sub> (d): No degradation is expected.  
 Kinetics: -  
 Field or Lab: -

Application data

Crop: Cucurbits, Tomato  
 Depth of soil layer: 5cm and 20cm  
 Soil bulk density: 1.5g/cm<sup>3</sup>  
 % plant interception: no crop interception  
 Number of applications: 1  
 Interval (d): -  
 Annual Application rate(s): 6000 g a.s./ha\*

\* Total must not exceed 6 kg/ha/yr

\*\* These PEC<sub>soil</sub> are representative for added copper for a time period of 10 years considering a range of different background values through two values derived for vineyard soils (10<sup>th</sup> percentile, median and 90<sup>th</sup> percentile values).

| PEC <sub>(s)</sub><br>(mg/kg) | Single application                                                                                                                                              | Single application    | Multiple application        | Multiple application  |
|-------------------------------|-----------------------------------------------------------------------------------------------------------------------------------------------------------------|-----------------------|-----------------------------|-----------------------|
|                               | Actual                                                                                                                                                          | Time weighted average | Actual                      | Time weighted average |
| Initial                       | -                                                                                                                                                               |                       | 8.0 (for 6000 g a.s./ha/yr) |                       |
| Short term                    | 24h                                                                                                                                                             | -                     | -                           | -                     |
|                               | 2d                                                                                                                                                              | -                     | -                           | -                     |
|                               | 4d                                                                                                                                                              | -                     | -                           | -                     |
| Long term                     | 7d                                                                                                                                                              | -                     | -                           | -                     |
|                               | 28d                                                                                                                                                             | -                     | -                           | -                     |
|                               | 50d                                                                                                                                                             | -                     | -                           | -                     |
|                               | 100d                                                                                                                                                            | -                     | -                           | -                     |
| Plateau concentration *       | Not reached<br><br>Background level<br>10 <sup>th</sup> centile: 35 mg/kg after 10 yr<br><br>Background level<br>90 <sup>th</sup> centile: 54 mg/kg after 10 yr |                       |                             |                       |

\* These PEC<sub>soil</sub> are representative for added copper for a time period of 10 years considering a range of different background values through two values derived for European arable soils (10<sup>th</sup> percentile, median and 90<sup>th</sup> percentile values).

**PEC ground water (Regulation (EU) N° 284/2013, Annex Part A, point 9.2.4.1)**

**FUNUGURAN-OH, CURENOX 50, POTIGLIA CAFFARO DF New, CUPROXAT SC, NORDOX 75**

The different background values used for PECgroundwater calculations are reported in section ‘Soil accumulation (Regulation (EU) N° 283/2013, Annex Part A, point 7.1.2.2.2 and Regulation (EU) N° 284/2013, Annex Part A, point 9.1.1.2.2)’.

Method of calculation and type of study (*e.g.* modelling, field leaching, lysimeter)

For FOCUS gw modelling, values used –  
 Modelling using FOCUS model(s), with appropriate FOCUSgw scenarios, according to FOCUS guidance.  
 Model(s) used: FOCUS PELMO v5.5.3, FOCUS PEARL v4.4.4  
 Crop: Grape  
 Crop uptake factor: 0  
 Water solubility (mg/L): 500 at pH 7 and 20°C  
 Vapour pressure: 0 Pa at 20°C  
 parent DT50: 1,000,000 days (No degradation is expected in soil).  
 Kdoc parent, geomean: 19509.9 mL/goc,  
 Kdom parent, geomean: 11315.7 mL/gom,  
 mean 1/n= 1.  
 Metabolites: -

Application rate

Gross application rate: 6000 g Total copper/ha.  
 Crop growth stage: BBCH 11-91  
 Canopy interception %: 0  
 Application rate net of interception: 6000 g/ha.  
 No. of applications: 1  
 Time of application (absolute application dates): 24 January  
 Vines: Background level considered in modelling: 160 mg Cu/kg

**PEC(gw) - FOCUS modelling results (80<sup>th</sup> percentile annual average concentration at 1m)**

| FOCUS PELMO 5.5.3 / Grape | Scenario     | Parent (µg/L) | Metabolite (µg/L) |               |                |
|---------------------------|--------------|---------------|-------------------|---------------|----------------|
|                           |              |               | <i>Met I</i>      | <i>Met II</i> | <i>Met III</i> |
|                           | Chateaudun   | < 0.001       | -                 | -             | -              |
|                           | Hamburg      | < 0.001       | -                 | -             | -              |
|                           | Jokioinen    | -             | -                 | -             | -              |
|                           | Kremsmunster | < 0.001       | -                 | -             | -              |
|                           | Okehampton   | -             | -                 | -             | -              |
|                           | Piacenza     | < 0.001       | -                 | -             | -              |
|                           | Porto        | <-0.001       | -                 | -             | -              |
|                           | Sevilla      | < 0.001       | -                 | -             | -              |
|                           | Thiva        | < 0.001       | -                 | -             | -              |

**PEC(gw) - FOCUS modelling results (80<sup>th</sup> percentile annual average concentration at 1m)**

| FOCUS PEARL 4.4.4 / Grape | Scenario     | Parent (µg/L) | Metabolite (µg/L) |               |                |
|---------------------------|--------------|---------------|-------------------|---------------|----------------|
|                           |              |               | <i>Met I</i>      | <i>Met II</i> | <i>Met III</i> |
|                           | Chateaudun   | < 0.001       | -                 | -             | -              |
|                           | Hamburg      | < 0.001       | -                 | -             | -              |
|                           | Jokioinen    | -             | -                 | -             | -              |
|                           | Kremsmunster | < 0.001       | -                 | -             | -              |
|                           | Okehampton   | -             | -                 | -             | -              |
|                           | Piacenza     | < 0.001       | -                 | -             | -              |
|                           | Porto        | < 0.001       | -                 | -             | -              |
|                           | Sevilla      | < 0.001       | -                 | -             | -              |
|                           | Thiva        | < 0.001       | -                 | -             | -              |

Method of calculation and type of study (e.g. modelling, field leaching, lysimeter)

For FOCUS gw modelling, values used –  
 Modelling using FOCUS model(s), with appropriate FOCUSgw scenarios, according to FOCUS guidance.  
 Model(s) used: FOCUS PELMO v5.5.3, FOCUS PEARL v4.4.4  
 Crop: Tomato, Cucurbits  
 Crop uptake factor: 0  
 Water solubility (mg/L): 500 at pH 7 and 20°C  
 Vapour pressure: 0 Pa at 20°C  
 parent DT50: 1,000,000 days (No degradation is expected in soil).  
 Kdoc parent, geomean: 19509.9 mL/goc,  
 Kdom parent, geomean: 11315.7 mL/gom,  
 mean 1/n= 1.  
 Metabolites: -

Application rate

Gross application rate: 6000 g Total copper/ha.  
 Crop growth stage:  
 Canopy interception %: 0  
 Application rate net of interception: 6000 g/ha.  
 No. of applications: 1  
 Time of application (absolute application dates): 0 days post emergence  
 Tomatoes/Cucurbits: Background level considered in modelling: 26 mg Cu/kg

### PEC(gw) - FOCUS modelling results (80<sup>th</sup> percentile annual average concentration at 1m)

| FOCUS PELMO 5.5.3 / Tomato, Cucurbits | Scenario     | Parent (µg/L) | Metabolite (µg/L) |               |                |
|---------------------------------------|--------------|---------------|-------------------|---------------|----------------|
|                                       |              |               | <i>Met I</i>      | <i>Met II</i> | <i>Met III</i> |
|                                       | Chateaudun   | < 0.001       | -                 | -             | -              |
|                                       | Hamburg      | -             | -                 | -             | -              |
|                                       | Jokioinen    | -             | -                 | -             | -              |
|                                       | Kremsmunster | -             | -                 | -             | -              |
|                                       | Okehampton   | -             | -                 | -             | -              |
|                                       | Piacenza     | < 0.001       | -                 | -             | -              |
|                                       | Porto        | -             | -                 | -             | -              |
|                                       | Sevilla      | < 0.001       | -                 | -             | -              |
|                                       | Thiva        | < 0.001       | -                 | -             | -              |



**PEC(gw) - FOCUS modelling results (80<sup>th</sup> percentile annual average concentration at 1m)**

| FOCUS PELMO 5.5.3 / Tomato, Cucurbits | Scenario     | Parent (µg/L) | Metabolite (µg/L) |        |         |
|---------------------------------------|--------------|---------------|-------------------|--------|---------|
|                                       |              |               | Met I             | Met II | Met III |
|                                       | Chateaudun   | < 0.001       | -                 | -      | -       |
|                                       | Hamburg      | -             | -                 | -      | -       |
|                                       | Jokioinen    | -             | -                 | -      | -       |
|                                       | Kremsmunster | -             | -                 | -      | -       |
|                                       | Okehampton   | -             | -                 | -      | -       |
|                                       | Piacenza     | < 0.001       | -                 | -      | -       |
|                                       | Porto        | -             | -                 | -      | -       |
|                                       | Sevilla      | < 0.001       | -                 | -      | -       |
|                                       | Thiva        | < 0.001       | -                 | -      | -       |

Method of calculation and type of study (e.g. modelling, field leaching, lysimeter)

For field and lysimeter studies  
 Location: *UK, N. Yorkshire*  
 Study type (e.g. lysimeter, field): *lysimeter*  
 Soil properties: pH = , OC= , MWHC =  
 Dates of application :  
 Crop : /Interception estimated:  
 Number of applications: *x* years, *x* applications year  
 Duration.  
 Average annual rainfall (mm): *x* mm  
 Average annual leachate volume (mm): *x* mm

**PEC<sub>(gw)</sub>** From lysimeter / field studies

| Parent                | 1 <sup>st</sup> year | 2 <sup>nd</sup> year | 3 <sup>rd</sup> year |
|-----------------------|----------------------|----------------------|----------------------|
| Annual average (µg/L) |                      |                      |                      |

| Metabolite X          | 1 <sup>st</sup> year | 2 <sup>nd</sup> year | 3 <sup>rd</sup> year |
|-----------------------|----------------------|----------------------|----------------------|
| Annual average (µg/L) |                      |                      |                      |

**PEC surface water and PEC sediment (Regulation (EU) N° 284/2013, Annex Part A, points 9.2.5 / 9.3.1)**

**FUNUGURAN-OH, CURENOX 50, POTIGLIA CAFFARO DF New, CUPROXAT SC, NORDOX 75**
**PECsw results**

A.) *via* Spray drift/runoff/drainage without mitigation (field crops)

Parent

Parameters used in FOCUSsw step 1 and 2

Version control no. of FOCUS calculator: FOCUS STEP 1-2 (v3.2)

Water solubility (mg/L): 500 at pH 7 and 20°C

Kdoc parent, geomean: 33,918.3 mL/goc

DT50 soil (d): 1,000

DT50 water (d): 1,000

DT50 sediment (d): 1,000

Crop interception (%): no

Parameters used in FOCUSsw step 3 (if performed)

-

Application rate

Crop and growth stage:

Vines; all BBCH stages

Tomatoes: BBCH 12-89

Cucumbers: BBCH 10-89

Number of applications: See following table

Interval (d): See following table

Application rate(s): See following table

Application window: See following table

| Uses                 | Application pattern         | Season of application | Region | Step 1       |                | Step 2       |                |
|----------------------|-----------------------------|-----------------------|--------|--------------|----------------|--------------|----------------|
|                      |                             |                       |        | PECsw (µg/L) | PECsed (µg/kg) | PECsw (µg/L) | PECsed (µg/kg) |
| Tomatoes, Cucumbers  | 1 x 850 g/ha                | Mar.-May              | N      | 13.95        | -              | 7.82         | -              |
|                      |                             |                       | S      |              |                | 7.82         | -              |
|                      | 7 x 850 g/ha<br>(7 days)    |                       | N      | 97.63        | -              | 9.47         | -              |
|                      |                             |                       | S      |              |                | 17.9         | -              |
| Vines, late applns.  | 1 x 1,250 g/ha              | Oct.-Feb.             | N      | 42.46        | -              | 33.45        | -              |
|                      |                             |                       | S      |              |                | 33.45        | -              |
|                      | 3 x 1,250 g/ha<br>(7 days)  |                       | N      | 127.39       | -              | 30.55        | -              |
|                      |                             |                       | S      |              |                | 30.55        | -              |
|                      | 4 x 1,250 g/ha<br>(21 days) |                       | N      | 169.86       | -              | 30.27        | -              |
|                      |                             |                       | S      |              |                | 30.27        | -              |
| Vines, early applns. | 1 x 1,250 g/ha              | Mar.-May              | N      | 20.26        | -              | 11.25        | -              |
|                      |                             |                       | S      |              |                | 11.25        | -              |
|                      | 6*1,250<br>(7 days)         |                       | N      | 121.56       | -              | 12.61        | -              |
|                      |                             |                       | S      |              |                | 23.27        | -              |

B.) *via* run-off/drainage only with runoff mitigation (Field crops)

Application rate

Version control no. of FOCUS calculator: FOCUS STEP 1-2 (v3.2)

Option: No spray drift

Parameters used in FOCUSsw step 3 (if performed)

Application rate

Water solubility (mg/L): 500 at pH 7 and 20°C  
 Kdoc parent, geomean: 33,918.3 mL/goc  
 DT50 soil (d): 1,000  
 DT50 water (d): 1,000  
 DT50 sediment (d): 1,000  
 Crop interception (%): no

Mitigation measures: 90% reduction on runoff

-

Crop and growth stage:  
 Vines; all BBCH stages  
 Tomatoes: BBCH 12-89  
 Cucumbers: BBCH 10-89  
 Number of applications: See following table  
 Interval (d): See following table  
 Application rate(s): See following table  
 Application window: See following table

| Uses                 | Application pattern      | Season of application | Region | Step 1       |                | Step 2       |                |                                  |
|----------------------|--------------------------|-----------------------|--------|--------------|----------------|--------------|----------------|----------------------------------|
|                      |                          |                       |        | PECsw (µg/L) | PECsed (µg/kg) | PECsw (µg/L) | PECsed (µg/kg) | PECsw with 90% mitigation (µg/L) |
| Tomatoes, Cucumbers  | 1 x 850 g/ha             | Mar.-May              | N      | 6.13         | -              | 1.22         | -              | 0.122                            |
|                      |                          |                       | S      |              |                | 2.45         | -              | 0.245                            |
|                      | 7 x 850 g/ha (7 days)    |                       | N      | 42.91        | -              | 8.43         | -              | 0.843                            |
|                      |                          |                       | S      |              |                | 16.87        | -              | 1.687                            |
| Vines, late applns.  | 1 x 1,250 g/ha           | Oct.-Feb.             | N      | 9.01         | -              | 4.49         | -              | 0.449                            |
|                      |                          |                       | S      |              |                | 3.6          | -              | 0.36                             |
|                      | 3 x 1,250 g/ha (7 days)  |                       | N      | 27.04        | -              | 13.29        | -              | 1.329                            |
|                      |                          |                       | S      |              |                | 10.63        | -              | 1.063                            |
|                      | 4 x 1,250 g/ha (21 days) |                       | N      | 36.06        | -              | 17.85        | -              | 1.785                            |
|                      |                          |                       | S      |              |                | 14.28        | -              | 1.428                            |
| Vines, early applns. | 1 x 1,250 g/ha           | Mar.-May              | N      | 9.01         | -              | 1.8          | -              | 0.18                             |
|                      |                          |                       | S      |              |                | 3.6          | -              | 0.36                             |
|                      | 6*1,250 (7 days)         |                       | N      | 54.08        | -              | 10.66        | -              | 1.066                            |
|                      |                          |                       | S      |              |                | 21.31        | -              | 2.13                             |
| Tomatoes, Cucumbers  | 1 x 6,000 g/ha           | Mar.-May              | N      | 43.27        | -              | 8.63         | -              | 0.863                            |
|                      |                          |                       | S      |              |                | 17.26        | -              | 1.726                            |
| Vines                | 1 x 6,000 g/ha           | Oct.-Feb.             | N      | 43.27        | -              | 21.57        | -              | 2.157                            |
|                      |                          |                       | S      |              |                | 17.26        | -              | 1.726                            |
|                      | 1 x 8,000 g/ha           |                       | N      | 57.69        | -              | 28.76        | -              | 2.876                            |
|                      |                          |                       | S      |              |                | 23.01        | -              | 2.301                            |

C.) via Spray drift only with spray drift mitigation (Field crops)

Application rate

Version control no. of FOCUS calculator: FOCUS STEP 1-2 (v3.2)

Parameters used in FOCUSsw step 3 (if performed)

Application rate

|                                                                                                                                                                                                                                                                              |
|------------------------------------------------------------------------------------------------------------------------------------------------------------------------------------------------------------------------------------------------------------------------------|
| Option: No Drainage/Runoff                                                                                                                                                                                                                                                   |
| Water solubility (mg/L): 500 at pH 7 and 20°C                                                                                                                                                                                                                                |
| Kdoc parent, geomean: 33,918.3 mL/goc                                                                                                                                                                                                                                        |
| DT50 soil (d): 1,000                                                                                                                                                                                                                                                         |
| DT50 water (d): 1,000                                                                                                                                                                                                                                                        |
| DT50 sediment (d): 1,000                                                                                                                                                                                                                                                     |
| Crop interception (%): no                                                                                                                                                                                                                                                    |
| Mitigation measures: Drift values for different distances derived from Drift calculator v1.1                                                                                                                                                                                 |
| -                                                                                                                                                                                                                                                                            |
| Crop and growth stage:<br>Vines; all BBCH stages<br>Tomatoes: BBCH 12-89<br>Cucumbers: BBCH 10-89<br>Number of applications: See following table<br>Interval (d): See following table<br>Application rate(s): See following table<br>Application window: See following table |

| Uses                 | Application pattern      | Season of application | Region | Step 1                   |                            |
|----------------------|--------------------------|-----------------------|--------|--------------------------|----------------------------|
|                      |                          |                       |        | PEC <sub>sw</sub> (µg/L) | PEC <sub>sed</sub> (µg/kg) |
| Tomatoes, Cucumbers  | 1 x 850 g/ha             | Mar.-May              | N      | 13.95                    | -                          |
|                      |                          |                       | S      |                          |                            |
|                      | 7 x 850 g/ha (7 days)    |                       | N      | 97.63                    | -                          |
|                      |                          |                       | S      |                          |                            |
| Vines, late applns.  | 1 x 1,250 g/ha           | Oct.-Feb.             | N      | 42.46                    | -                          |
|                      |                          |                       | S      |                          |                            |
|                      | 3 x 1,250 g/ha (7 days)  |                       | N      | 127.39                   | -                          |
|                      |                          |                       | S      |                          |                            |
|                      | 4 x 1,250 g/ha (21 days) |                       | N      | 169.86                   | -                          |
|                      |                          |                       | S      |                          |                            |
| Vines, early applns. | 1 x 1,250 g/ha           | Mar.-May              | N      | 20.26                    | -                          |
|                      |                          |                       | S      |                          |                            |
|                      | 6*1,250 (7 days)         |                       | N      | 60.78                    | -                          |
|                      |                          |                       | S      |                          |                            |

| Uses                | Application pattern   | Season of application | Region | Step 2                   |                            |                         |                         |                         |                         |
|---------------------|-----------------------|-----------------------|--------|--------------------------|----------------------------|-------------------------|-------------------------|-------------------------|-------------------------|
|                     |                       |                       |        | PEC <sub>sw</sub> (µg/L) | PEC <sub>sed</sub> (µg/kg) | including a NSZ of 10 m | including a NSZ of 20 m | including a NSZ of 30 m | including a NSZ of 50 m |
| Tomatoes, Cucumbers | 1 x 850 g/ha          | Mar.-May              | N      | 7.82                     | -                          | 0.82 (89)               | 0.42 (95)               | --                      | --                      |
|                     |                       |                       | S      |                          |                            |                         |                         |                         |                         |
|                     | 7 x 850 g/ha (7 days) |                       | N      | 5.32                     | -                          | 0.56 (90)               | 0.28 (95)               | --                      | --                      |
|                     |                       |                       | S      |                          |                            |                         |                         |                         |                         |
| Vines, late applns. | 1 x 1,250 g/ha        | Oct.-Feb.             | N      | 33.45                    | -                          | 5.09 (85)               | 1.72 (95)               | --                      | --                      |
|                     |                       |                       | S      |                          |                            |                         |                         |                         |                         |

|                      |                          |          |   |       |   |           |           |    |    |
|----------------------|--------------------------|----------|---|-------|---|-----------|-----------|----|----|
|                      | 3 x 1,250 g/ha (7 days)  |          | N | 30.55 | - | 4.54 (85) | 1.51 (95) | -- | -- |
|                      |                          |          | S |       |   |           |           |    |    |
|                      | 4 x 1,250 g/ha (21 days) |          | N | 30.27 | - | 4.55 (85) | 1.53 (95) | -- | -- |
|                      |                          |          | S |       |   |           |           |    |    |
| Vines, early applns. | 1 x 1,250 g/ha           | Mar.-May | N | 11.25 | - | 1.21 (89) | 0.53 (95) | -- | -- |
|                      |                          |          | S |       |   |           |           |    |    |
|                      | 6*1,250 (7 days)         |          | N | 11.29 | - | 1.46 (87) | --        | -- | -- |
|                      |                          |          | S |       |   |           |           |    |    |

NSZ: No-spray buffer zone

-- Values going beyond 95% mitigation

In brackets, % reduction in exposure

PEC<sub>sw</sub> from calculations reported in points b) and c) were summed in order to derive the final PEC results from all entry routes to water bodies that introduced the maximum mitigation agreed in FOCUS Landscape and mitigation (FOCUS, 2007) guidance.

| Uses                | Application pattern     | Season of application | Scenario | PEC <sub>sw</sub> Step 2, Runoff/Drainage | PEC <sub>sw</sub> Step 2, Drift | Total              |
|---------------------|-------------------------|-----------------------|----------|-------------------------------------------|---------------------------------|--------------------|
|                     |                         |                       |          | Including 90% reduction                   | Including NSZ 20 m              | VBZ 20 m + NSZ 20m |
| Tomatoes, Cucumbers | 1 x 850 g/ha            | Mar.-May              | N        | 0.122                                     | 0.42                            | 0.54               |
|                     |                         |                       | S        | 0.245                                     | 0.42                            | 0.66               |
|                     | 7 x 850 g/ha (7 days)   |                       | N        | 0.843                                     | 0.28                            | 1.12               |
|                     |                         |                       | S        | 1.687                                     | 0.28                            | 1.97               |
| Vines, late appl.   | 1 x 1250 g/ha           | Oct.-Feb              | N        | 0.449                                     | 1.72                            | 2.17               |
|                     |                         |                       | S        | 0.36                                      | 1.72                            | 2.08               |
|                     | 3 x 1250 g/ha (7 days)  |                       | N        | 1.329                                     | 1.51                            | 2.84               |
|                     |                         |                       | S        | 1.063                                     | 1.51                            | 2.58               |
|                     | 4 x 1250 g/ha (21 days) |                       | N        | 1.785                                     | 1.53                            | 3.31               |
|                     |                         |                       | S        | 1.428                                     | 1.53                            | 2.95               |
| Vines, early appl.  | 1 x 1250 g/ha           | Mar.-May              | N        | 0.18                                      | 0.53                            | 0.71               |
|                     |                         |                       | S        | 0.36                                      | 0.53                            | 0.89               |
|                     | 6 x 1250 (7 days)       |                       | N        | 1.066                                     | -                               | -                  |
|                     |                         |                       | S        | 2.131                                     | -                               | -                  |
| Tomatoes, Cucumbers | 1 x 6000 g/ha           | Mar.-May              | N        | 0.863                                     | 0.42                            | 1.28               |
|                     |                         |                       | S        | 1.726                                     | 0.42                            | 2.14               |
| Vines               | 1 x 6000 g/ha           | Oct.-Feb              | N        | 2.157                                     | 1.72                            | 3.88               |
|                     |                         |                       | S        | 1.726                                     | 1.72                            | 3.45               |
|                     | 1 x 8000 g/ha           |                       | N        | 2.876                                     | 1.72                            | 4.60               |
|                     |                         |                       | S        | 2.301                                     | 1.72                            | 4.02               |

D.) via Spray drift only without mitigation (Indoor crops)

Parent

Parameters used in FOCUS<sub>sw</sub> step 1 and 2

|                                               |
|-----------------------------------------------|
| Water solubility (mg/L): not needed           |
| K <sub>d</sub> oc parent, geomean: not needed |
| DT50 soil (d): not needed                     |
| DT50 water (d): not needed                    |

Parameters used in FOCUSsw step 3 (if performed)

Application rate

|                                                          |
|----------------------------------------------------------|
| DT50 sediment (d): not needed                            |
| Crop interception (%): no                                |
| -                                                        |
| Crop and growth stage:<br>Tomatoes/Cucumbers; BBCH 10-89 |
| Number of applications: 1-8                              |
| Interval (d): 7                                          |
| Application rate(s): 1,250-6,000 g/ha                    |
| Application window: -                                    |
| Drift value: 0.1%                                        |

| Crop                  | Maximum Application Rate [g a.s. /ha] | Buffer [m] | Drift Rate [%] | PEC <sub>sw</sub> [µg/L] |
|-----------------------|---------------------------------------|------------|----------------|--------------------------|
| Tomatoes<br>Cucumbers | 1 x 1,250                             | -          | 0.1            | 0.42                     |
| Tomatoes<br>Cucumbers | 1 x 6,000                             | -          | 0.1            | 2.00                     |

**PECsed results**

Parent

Parameters used in FOCUSsw step 1 and 2

Version control no. of FOCUS calculator: FOCUS STEP 1-2 v3.2

Water solubility (mg/L): 500 at pH 7 and 20°C

Kdoc parent, geomean: 10,000 mL/goc

DT50 soil (d): 1,000

DT50 water (d): 1,000

DT50 sediment (d): 1,000

Crop interception (%): no

Parameters used in FOCUSsw step 3 (if performed)

Application rate

-

Crop and growth stage:  
Grape; all BBCH stages  
Tomatoes: BBCH 12-89  
Cucumbers: BBCH 10-89

Number of applications: See following table

Interval (d): See following table

Application rate(s): See following table

Application window: See following table

Mitigation measures: 80-90% reduction on runoff

Background level of copper in sediment considered:  
17 mg/kg (median value)

|                                                                                 | Scenario | Step 2 <i>via</i> run-off/drainage                                                                           |                                                                                                                                              |                                                                                                                                              |
|---------------------------------------------------------------------------------|----------|--------------------------------------------------------------------------------------------------------------|----------------------------------------------------------------------------------------------------------------------------------------------|----------------------------------------------------------------------------------------------------------------------------------------------|
|                                                                                 |          | PEC <sub>sed, accumulation</sub><br>Total copper<br>(10 years accumulation)<br>+ background level<br>(mg/kg) | PEC <sub>sed, accumulation</sub><br>Total copper<br>(10 years accumulation)<br>background level<br>(mg/kg)<br><br>Mitigation applied:<br>80% | PEC <sub>sed, accumulation</sub><br>Total copper<br>(10 years accumulation)<br>background level<br>(mg/kg)<br><br>Mitigation<br>applied: 90% |
| Outdoor uses no interception, 1 *<br>850 g/ha; early application; march-<br>may | N        | 21.0                                                                                                         | 17.8                                                                                                                                         | 17.4                                                                                                                                         |
|                                                                                 | S        | 24.9                                                                                                         | 18.6                                                                                                                                         | 17.8                                                                                                                                         |
| Outdoor uses no interception, 1 *<br>850 g/ha; late application; June-Sep       | N        | 21.0                                                                                                         | 17.8                                                                                                                                         | 17.4                                                                                                                                         |
|                                                                                 | S        | 22.9                                                                                                         | 18.2                                                                                                                                         | 17.6                                                                                                                                         |
| Outdoor uses no interception, 1 *<br>1250 g/ha; early application; Octo-<br>Feb | N        | 31.6                                                                                                         | 19.9                                                                                                                                         | 18.5                                                                                                                                         |
|                                                                                 | S        | 28.7                                                                                                         | 19.3                                                                                                                                         | 18.2                                                                                                                                         |
| Outdoor uses no interception, 1 *<br>1250 g/ha; late application; June-<br>Sept | N        | 22.8                                                                                                         | 18.2                                                                                                                                         | 17.6                                                                                                                                         |
|                                                                                 | S        | 25.7                                                                                                         | 18.7                                                                                                                                         | 17.9                                                                                                                                         |
| Outdoor uses no interception, 1 *<br>6000 g/ha; early application; Octo-<br>Feb | N        | 86.9                                                                                                         | 31.0                                                                                                                                         | 24.0                                                                                                                                         |
|                                                                                 | S        | 72.9                                                                                                         | 28.2                                                                                                                                         | 22.6                                                                                                                                         |
| Outdoor uses no interception, 1 *<br>6000 g/ha; late application; June-<br>Sept | N        | 45.0                                                                                                         | 22.6                                                                                                                                         | 19.8                                                                                                                                         |
|                                                                                 | S        | 59.0                                                                                                         | 25.4                                                                                                                                         | 21.2                                                                                                                                         |

| Crop                  | Maximum<br>Application<br>Rate<br>[g a.s. /ha] | Buffer<br>[m] | PEC <sub>sed, accumulation</sub><br>Total copper<br>(10 years accumulation)<br>+ background level<br>(mg/kg) |
|-----------------------|------------------------------------------------|---------------|--------------------------------------------------------------------------------------------------------------|
| Tomatoes<br>Cucumbers | 1 x 850                                        | Step 3        | 19.1                                                                                                         |
|                       |                                                | 5 m           | 17.6                                                                                                         |
|                       |                                                | 10 m          | 17.3                                                                                                         |
|                       |                                                | 20 m          | 17.1                                                                                                         |
|                       |                                                | 50 m          | --                                                                                                           |
| Tomatoes<br>Cucumbers | 1 x 6,000                                      | Step 3        | 25.3                                                                                                         |
|                       |                                                | 5 m           | 19.2                                                                                                         |
|                       |                                                | 10 m          | 18.2                                                                                                         |
|                       |                                                | 20 m          | 17.6                                                                                                         |
|                       |                                                | 50 m          | --                                                                                                           |
| Vines, late applns.   | 1 x 1,250                                      | Step 3        | 25.1                                                                                                         |
|                       |                                                | 5 m           | 21.9                                                                                                         |
|                       |                                                | 10 m          | 18.8                                                                                                         |
|                       |                                                | 20 m          | 17.6                                                                                                         |
|                       |                                                | 50 m          | --                                                                                                           |
| Vines, late applns.   | 1 x 6,000                                      | Step 3        | 49.0                                                                                                         |

| Crop                 | Maximum Application Rate [g a.s. /ha] | Buffer [m] | PEC <sub>sed, accumulation</sub>                                |
|----------------------|---------------------------------------|------------|-----------------------------------------------------------------|
|                      |                                       |            | Total copper (10 years accumulation) + background level (mg/kg) |
|                      |                                       | 5 m        | 36.3                                                            |
|                      |                                       | 10 m       | 23.9                                                            |
|                      |                                       | 20 m       | 19.4                                                            |
|                      |                                       | 50 m       | --                                                              |
| Vines, early applns. | 1 x 1,250                             | Step 3     | 19.7                                                            |
|                      |                                       | 5 m        | 18.6                                                            |
|                      |                                       | 10 m       | 17.6                                                            |
|                      |                                       | 20 m       | 17.2                                                            |
|                      |                                       | 50 m       | --                                                              |
| Vines, early applns. | 1 x 6,000                             | Step 3     | 28.8                                                            |
|                      |                                       | 5 m        | 23.8                                                            |
|                      |                                       | 10 m       | 19.2                                                            |
|                      |                                       | 20 m       | 17.7                                                            |
|                      |                                       | 50 m       | --                                                              |

-- Values going beyond 95% mitigation on calculated PEC<sub>sw</sub>

#### Estimation of concentrations from other routes of exposure (Regulation (EU) N° 284/2013, Annex Part A, point 9.4)

Method of calculation

Not relevant.

#### PEC

Maximum concentration

-



## Ecotoxicology

### Effects on birds and other terrestrial vertebrates (Regulation (EU) N° 283/2013, Annex Part A, point 8.1 and Regulation (EU) N° 284/2013, Annex Part A, point 10.1)

| Birds ‡                                  |                              |              |                         |                         |
|------------------------------------------|------------------------------|--------------|-------------------------|-------------------------|
| Species                                  | Test substance               | Time scale   | LD50 (mg Cu/kg bw)      |                         |
| <i>Colinus virginianus</i>               | Copper hydroxide             | Acute        | 223                     |                         |
| <i>Coturnix coturnix japonica</i>        | Copper hydroxide             | Acute        | 556                     |                         |
| <i>Colinus virginianus</i>               | Copper hydroxide WP          | Acute        | 357                     |                         |
| <i>Colinus virginianus</i>               | Copper oxychloride           | Acute        | 511                     |                         |
| <b><i>Coturnix coturnix japonica</i></b> | <b>Copper oxychloride WP</b> | <b>Acute</b> | <b>173<sup>a</sup></b>  |                         |
| <i>Colinus virginianus</i>               | Bordeaux mixture             | Acute        | > 616                   |                         |
| <i>Colinus virginianus</i>               | Bordeaux mixture WP          | Acute        | > 439.9                 |                         |
| <i>Colinus virginianus</i>               | Tribasic copper sulfate      | Acute        | 616                     |                         |
| <i>Colinus virginianus</i>               | Tribasic copper sulfate SC   | Acute        | > 72.4                  |                         |
| <i>Coturnix coturnix japonica</i>        | Tribasic copper sulfate SC   | Acute        | 221                     |                         |
| <i>Coturnix coturnix japonica</i>        | Copper oxide                 | Acute        | 1 183                   |                         |
| <i>Coturnix coturnix japonica</i>        | Copper oxide WG              | Acute        | 650                     |                         |
| Species                                  | Test substance               | Time scale   | LC50 (mg Cu/kg bw/day)  | LD50 (mg Cu/kg feed)    |
| <i>Colinus virginianus</i>               | Copper oxychloride           | Short-term   | 1939                    | 333                     |
| <i>Colinus virginianus</i>               | Bordeaux mixture             | Short-term   | > 1369                  | > 334.1                 |
| Species                                  | Test substance               | Time scale   | NOEL (mg Cu/kg bw/day)  | NOEC (mg Cu/kg feed)    |
| <i>Colinus virginianus</i>               | Copper hydroxide             | Short-term   | 123.6 <sup>b</sup>      | 883 <sup>c</sup>        |
| <i>Anas platyrhynchos</i>                | Copper hydroxide             | Short-term   | 215.6 <sup>b</sup>      | 1 053 <sup>c</sup>      |
| <i>Colinus virginianus</i>               | Copper hydroxide             | Short-term   | 135.2 <sup>b</sup>      | 963 <sup>c</sup>        |
| <i>Anas platyrhynchos</i>                | Copper hydroxide             | Short-term   | 190.6 <sup>b</sup>      | 963 <sup>c</sup>        |
| <i>Colinus virginianus</i>               | Tribasic copper sulfate      | Short-term   | 89 <sup>b</sup>         | 246 <sup>c</sup>        |
| <i>Anas platyrhynchos</i>                | Tribasic copper sulfate      | Short-term   | 176.3 <sup>b</sup>      | 530 <sup>c</sup>        |
| <i>Colinus virginianus</i>               | Copper oxide                 | Short-term   | 32 <sup>b</sup>         | 136 <sup>c</sup>        |
| <i>Colinus virginianus</i>               | Copper hydroxide             | Long-term    | <b>5.05<sup>a</sup></b> | <b>57.5<sup>a</sup></b> |

|                                                                                                                                                                                                                                                                                                                                                                                                                                                                                                                                                                                                                                                                                                                                                                                                                                                                 |                  |           |       |     |
|-----------------------------------------------------------------------------------------------------------------------------------------------------------------------------------------------------------------------------------------------------------------------------------------------------------------------------------------------------------------------------------------------------------------------------------------------------------------------------------------------------------------------------------------------------------------------------------------------------------------------------------------------------------------------------------------------------------------------------------------------------------------------------------------------------------------------------------------------------------------|------------------|-----------|-------|-----|
| <i>Anas platyrhynchos</i>                                                                                                                                                                                                                                                                                                                                                                                                                                                                                                                                                                                                                                                                                                                                                                                                                                       | Copper hydroxide | Long-term | 42.34 | 288 |
| <i>Colinus virginianus</i>                                                                                                                                                                                                                                                                                                                                                                                                                                                                                                                                                                                                                                                                                                                                                                                                                                      | Copper hydroxide | Long-term | 25.41 | 288 |
| <i>Anas platyrhynchos</i>                                                                                                                                                                                                                                                                                                                                                                                                                                                                                                                                                                                                                                                                                                                                                                                                                                       | Copper hydroxide | Long-term | 50.3  | 288 |
| Endocrine disrupting properties (Annex Part A, points 8.1.5)<br>No information highlights any ED property of copper                                                                                                                                                                                                                                                                                                                                                                                                                                                                                                                                                                                                                                                                                                                                             |                  |           |       |     |
| Additional higher tier studies (Annex Part A, points 10.1.1.2):<br>A literature review provides a weight of evidence approach concluding to acceptable risks to birds for doses of 5 kg Cu/ha/year, for granivorous and insectivorous birds.                                                                                                                                                                                                                                                                                                                                                                                                                                                                                                                                                                                                                    |                  |           |       |     |
| Terrestrial vertebrate wildlife (birds, mammals, reptile and amphibians) (Annex Part A, points 8.1.4, 10.1.3):<br>There have been 14 potentially relevant publications identified. A range of median lethal or effective concentrations for amphibians was found to be from 19.5 to 180 µg Cu/L while the lowest value that caused significant effects to an amphibian (toad) was 4.25 µg/L (measured concentrations). A NOAL value of 283.3 mg/kg soil (mean measured concentrations) was identified.<br><br>Concerning the risk for amphibians and reptiles, no guidance document is available; however, based on the data retrieved from the literature, those organisms are considered less sensitive than fish or birds. Therefore, the risk assessment performed for birds and aquatic organisms are considered to cover that of amphibians and reptiles. |                  |           |       |     |

a: data retained for the risk assessment

b: LD<sub>50</sub> was not relevant because of food avoidance

c: LC<sub>50</sub> was not relevant because of food avoidance

| Mammals ‡                        |                                |                                |                                               |
|----------------------------------|--------------------------------|--------------------------------|-----------------------------------------------|
| Species                          | Test substance                 | Time scale                     | LD <sub>50</sub><br>(mg Cu/kg bw)             |
| <b>Rat</b>                       | <b>Tribasic copper sulfate</b> | <b>Acute</b>                   | <b>162.6<sup>a</sup></b> to 271               |
| Species                          | Test substance                 | Time scale                     | NOEL<br>(mg Cu/kg bw)                         |
| <b>Rat</b>                       | <b>Copper sulfate</b>          | <b>Long-term<br/>(90 days)</b> | <b>16<sup>a</sup></b> (males)<br>17 (females) |
| Additional higher tier studies ‡ |                                |                                |                                               |

a: data retained for the risk assessment.

### Toxicity/exposure ratios for terrestrial vertebrates (Regulation (EU) N° 284/2013, Part A, Annex point 10.1)

#### Vineyard s at 1250 g a.s./ha [8 applications]

The risk assessment provided below was realized assuming a MAF and TWA = 1 and one maximal application at 8 kg/ha for vineyard.

| Growth stage           | Indicator or focal species | Time scale | DDD<br>(mg/kg bw per day) | TER          | Trigger |
|------------------------|----------------------------|------------|---------------------------|--------------|---------|
| Screening Step (Birds) |                            |            |                           |              |         |
| All                    | Small omnivorous bird      | Acute      | 762.4                     | <b>0.2</b>   | 10      |
| All                    | Small omnivorous bird      | Long-term  | 311.2                     | <b>0.016</b> | 5       |

| Growth stage                                                                                                                                                                                   | Indicator or focal species              | Time scale | DDD<br>(mg/kg bw per<br>day) | TER         | Trigger |
|------------------------------------------------------------------------------------------------------------------------------------------------------------------------------------------------|-----------------------------------------|------------|------------------------------|-------------|---------|
| Tier 1 (Birds)                                                                                                                                                                                 |                                         |            |                              |             |         |
| BBCH 10-19                                                                                                                                                                                     | Small insectivorous bird<br>"redstart"  | Acute      | 219.2                        | <b>0.8</b>  | 10      |
| BBCH >20                                                                                                                                                                                       | Small insectivorous bird<br>"redstart"  | Acute      | 205.6                        | <b>0.8</b>  | 10      |
| BBCH 10-19                                                                                                                                                                                     | Small granivorous bird<br>"finch"       | Acute      | 118.4                        | <b>1.5</b>  | 10      |
| BBCH 20-39                                                                                                                                                                                     | Small granivorous bird<br>"finch"       | Acute      | 99.2                         | <b>1.7</b>  | 10      |
| BBCH >40                                                                                                                                                                                       | Small granivorous bird<br>"finch"       | Acute      | 59.2                         | <b>2.9</b>  | 10      |
| Ripening                                                                                                                                                                                       | Frugivorous bird<br>"Thrush/Starling"   | Acute      | 231.2                        | <b>0.7</b>  | 10      |
| BBCH 10-19                                                                                                                                                                                     | Small omnivorous bird<br>"lark"         | Acute      | 115.2                        | <b>1.5</b>  | 10      |
| BBCH 20-39                                                                                                                                                                                     | Small omnivorous bird<br>"lark"         | Acute      | 96                           | <b>1.8</b>  | 10      |
| BBCH >40                                                                                                                                                                                       | Small omnivorous bird<br>"lark"         | Acute      | 57.6                         | <b>3.0</b>  | 10      |
| BBCH 10-19                                                                                                                                                                                     | Small insectivorous bird<br>"redstart"  | Long-term  | 92                           | <b>0.05</b> | 5       |
| BBCH >20                                                                                                                                                                                       | Small insectivorous bird<br>"redstart"  | Long-term  | 79.2                         | <b>0.06</b> | 5       |
| BBCH 10-19                                                                                                                                                                                     | Small granivorous bird<br>"finch"       | Long-term  | 55.2                         | <b>0.09</b> | 5       |
| BBCH 20-39                                                                                                                                                                                     | Small granivorous bird<br>"finch"       | Long-term  | 45.6                         | <b>0.11</b> | 5       |
| BBCH >40                                                                                                                                                                                       | Small granivorous bird<br>"finch"       | Long-term  | 27.2                         | <b>0.18</b> | 5       |
| Ripening                                                                                                                                                                                       | Frugivorous bird<br>"Thrush/Starling"   | Long-term  | 115.2                        | <b>0.04</b> | 5       |
| BBCH 10-19                                                                                                                                                                                     | Small omnivorous bird<br>"lark"         | Long-term  | 52                           | <b>0.1</b>  | 5       |
| BBCH 20-39                                                                                                                                                                                     | Small omnivorous bird<br>"lark"         | Long-term  | 43.2                         | <b>0.12</b> | 5       |
| BBCH >40                                                                                                                                                                                       | Small omnivorous bird<br>"lark"         | Long-term  | 26.4                         | <b>0.19</b> | 5       |
| Higher tier (birds): A literature review provides a weight of evidence approach concluding to acceptable risks to birds for doses of 5 kg Cu/ha/year, for granivorous and insectivorous birds. |                                         |            |                              |             |         |
| Screening Step (Mammals)                                                                                                                                                                       |                                         |            |                              |             |         |
| All                                                                                                                                                                                            | Small herbivorous mammal                | Acute      | 1091.2                       | <b>0.15</b> | 10      |
| All                                                                                                                                                                                            | Small herbivorous mammal                | Long-term  | 578.4                        | <b>0.03</b> | 5       |
| Tier 1 (Mammals)                                                                                                                                                                               |                                         |            |                              |             |         |
| Application<br>ground<br>directed                                                                                                                                                              | Large herbivorous mammal<br>"lagomorph" | Acute      | 217.6                        | <b>0.75</b> | 10      |
| BBCH 10-19                                                                                                                                                                                     | Large herbivorous mammal<br>"lagomorph" | Acute      | 130.4                        | <b>1.25</b> | 10      |
| BBCH 20-39                                                                                                                                                                                     | Large herbivorous mammal<br>"lagomorph" | Acute      | 108.8                        | <b>1.50</b> | 10      |
| BBCH >40                                                                                                                                                                                       | Large herbivorous mammal<br>"lagomorph" | Acute      | 64.8                         | <b>2.51</b> | 10      |

| Growth stage                         | Indicator or focal species           | Time scale | DDD<br>(mg/kg bw per<br>day) | TER         | Trigger |
|--------------------------------------|--------------------------------------|------------|------------------------------|-------------|---------|
| BBCH 10-19                           | Small insectivorous mammal “shrew”   | Acute      | 60.8                         | <b>2.67</b> | 10      |
| BBCH >20                             | Small insectivorous mammal “shrew”   | Acute      | 43.2                         | <b>3.76</b> | 10      |
| Application ground directed          | Small herbivorous mammal “vole”      | Acute      | 1091.2                       | <b>0.15</b> | 10      |
| Application crop directed BBCH 10-19 | Small herbivorous mammal “vole”      | Acute      | 655.2                        | <b>0.25</b> | 10      |
| Application crop directed BBCH 20-39 | Small herbivorous mammal “vole”      | Acute      | 545.6                        | <b>0.30</b> | 10      |
| Application crop directed BBCH >40   | Small herbivorous mammal “vole”      | Acute      | 327.2                        | <b>0.50</b> | 10      |
| Application ground directed          | Small omnivorous mammal “mouse”      | Acute      | 137.6                        | <b>1.18</b> | 10      |
| Application crop directed BBCH 10-19 | Small omnivorous mammal “mouse”      | Acute      | 82.4                         | <b>1.97</b> | 10      |
| Application crop directed BBCH 20-39 | Small omnivorous mammal “mouse”      | Acute      | 68.8                         | <b>2.36</b> | 10      |
| Application crop directed BBCH >40   | Small omnivorous mammal “mouse”      | Acute      | 41.6                         | <b>3.91</b> | 10      |
| Application ground directed          | Large herbivorous mammal “lagomorph” | Long-term  | 88.8                         | <b>0.18</b> | 5       |
| BBCH 10-19                           | Large herbivorous mammal “lagomorph” | Long-term  | 53.6                         | <b>0.30</b> | 5       |
| BBCH 20-39                           | Large herbivorous mammal “lagomorph” | Long-term  | 44                           | <b>0.36</b> | 5       |
| BBCH >40                             | Large herbivorous mammal “lagomorph” | Long-term  | 26.4                         | <b>0.61</b> | 5       |
| BBCH 10-19                           | Small insectivorous mammal “shrew”   | Long-term  | 33.6                         | <b>0.48</b> | 5       |
| BBCH >20                             | Small insectivorous mammal “shrew”   | Long-term  | 15.2                         | 1.05        | 5       |
| Application ground directed          | Small herbivorous mammal “vole”      | Long-term  | 578.4                        | <b>0.03</b> | 5       |
| Application crop directed BBCH 10-19 | Small herbivorous mammal “vole”      | Long-term  | 347.2                        | <b>0.05</b> | 5       |

| Growth stage                                                                                                                                                                                          | Indicator or focal species      | Time scale | DDD<br>(mg/kg bw per day) | TER         | Trigger |
|-------------------------------------------------------------------------------------------------------------------------------------------------------------------------------------------------------|---------------------------------|------------|---------------------------|-------------|---------|
| Application crop directed BBCH 20-39                                                                                                                                                                  | Small herbivorous mammal "vole" | Long-term  | 288.8                     | <b>0.05</b> | 5       |
| Application crop directed BBCH >40                                                                                                                                                                    | Small herbivorous mammal "vole" | Long-term  | 173.6                     | <b>0.09</b> | 5       |
| Application ground directed                                                                                                                                                                           | Small omnivorous mammal "mouse" | Long-term  | 62.4                      | <b>0.26</b> | 5       |
| Application crop directed BBCH 10-19                                                                                                                                                                  | Small omnivorous mammal "mouse" | Long-term  | 37.6                      | <b>0.42</b> | 5       |
| Application crop directed BBCH 20-39                                                                                                                                                                  | Small omnivorous mammal "mouse" | Long-term  | 31.2                      | <b>0.51</b> | 5       |
| Application crop directed BBCH >40                                                                                                                                                                    | Small omnivorous mammal "mouse" | Long-term  | 18.4                      | <b>0.87</b> | 5       |
| Higher tier (Mammals): A literature review provides evidence of homeostatic mechanisms, and allows concluding to acceptable long-term risks based on weight of evidence except for large herbivorous. |                                 |            |                           |             |         |
| <b>Risk from bioaccumulation and food chain behaviour</b> [indicate when not relevant i.e. if $\text{Log } k_{ow} \leq 3$ ]                                                                           |                                 |            |                           |             |         |
| A literature review provides evidence of lack of bioaccumulation in aquatic food chain.                                                                                                               |                                 |            |                           |             |         |
| <b>Risk from consumption of contaminated water</b>                                                                                                                                                    |                                 |            |                           |             |         |
| Scenarios                                                                                                                                                                                             | Indicator or focal species      | Time scale | PEC <sub>dw</sub> xDWR    | TER         | Trigger |
| Leaf scenario                                                                                                                                                                                         | Birds                           | acute      | Not required              |             | 5       |
| <b>Puddle scenario, Screening step</b>                                                                                                                                                                |                                 |            |                           |             |         |
| 1) Application rate (g a.s./ha)/relevant endpoint <50 (koc<500 L/kg), TER calculation not needed for birds and mammals                                                                                |                                 |            |                           |             |         |
| 2) Application rate (g a.s./ha)/relevant endpoint <3000 (koc≥500 L/kg), TER calculation not needed for birds and mammals                                                                              |                                 |            |                           |             |         |

### Fruiting vegetables 850 g a.s./ha, [8 applications]

The risk assessment provided below was realized assuming a MAF and TWA = 1 and one maximal application at 6 kg/ha for fruiting vegetables.

| Growth stage           | Indicator or focal species | Time scale | DDD<br>(mg/kg bw per day) | TER          | Trigger |
|------------------------|----------------------------|------------|---------------------------|--------------|---------|
| Screening Step (Birds) |                            |            |                           |              |         |
| All                    | Small omnivorous bird      | Acute      | 952.8                     | <b>0.18</b>  | 10      |
| All                    | Small omnivorous bird      | Long-term  | 388.80                    | <b>0.013</b> | 5       |

| Growth stage                                                                                                                                                                                   | Indicator or focal species            | Time scale | DDD<br>(mg/kg bw per<br>day) | TER         | Trigger |
|------------------------------------------------------------------------------------------------------------------------------------------------------------------------------------------------|---------------------------------------|------------|------------------------------|-------------|---------|
| Tier 1 (Birds)                                                                                                                                                                                 |                                       |            |                              |             |         |
| BBCH 71-89                                                                                                                                                                                     | Frugivorous bird "crow"               | Acute      | 344.4                        | <b>0.50</b> | 10      |
| BBCH 10-49                                                                                                                                                                                     | Small granivorous bird<br>"finch"     | Acute      | 148.2                        | <b>1.17</b> | 10      |
| BBCH >50                                                                                                                                                                                       | Small granivorous bird<br>"finch"     | Acute      | <del>12.0</del> 44.4         | 3.90        | 10      |
| BBCH 10-49                                                                                                                                                                                     | Small omnivorous bird<br>"lark"       | Acute      | 144                          | <b>1.21</b> | 10      |
| BBCH >50                                                                                                                                                                                       | Small omnivorous bird<br>"lark"       | Acute      | 43.2                         | 4.00        | 10      |
| BBCH 71-89                                                                                                                                                                                     | Frugivorous bird "starling"           | Acute      | 296.6                        | <b>0.58</b> | 10      |
| BBCH 10-19                                                                                                                                                                                     | Small insectivorous bird<br>"wagtail" | Acute      | 160.8                        | <b>1.07</b> | 10      |
| BBCH >20                                                                                                                                                                                       | Small insectivorous bird<br>"wagtail" | Acute      | 151.2                        | <b>1.14</b> | 10      |
| BBCH 71-89                                                                                                                                                                                     | Frugivorous bird "crow"               | Long-term  | 192                          | <b>0.03</b> | 5       |
| BBCH 10-49                                                                                                                                                                                     | Small granivorous bird<br>"finch"     | Long-term  | 68.4                         | <b>0.07</b> | 5       |
| BBCH >50                                                                                                                                                                                       | Small granivorous bird<br>"finch"     | Long-term  | 20.4                         | <b>0.24</b> | 5       |
| BBCH 10-49                                                                                                                                                                                     | Small omnivorous bird<br>"lark"       | Long-term  | 65.4                         | <b>0.08</b> | 5       |
| BBCH >50                                                                                                                                                                                       | Small omnivorous bird<br>"lark"       | Long-term  | 19.8                         | <b>0.25</b> | 5       |
| BBCH 71-89                                                                                                                                                                                     | Frugivorous bird "starling"           | Long-term  | 124.2                        | <b>0.04</b> | 5       |
| BBCH 10-19                                                                                                                                                                                     | Small insectivorous bird<br>"wagtail" | Long-term  | 67.8                         | <b>0.07</b> | 5       |
| BBCH >20                                                                                                                                                                                       | Small insectivorous bird<br>"wagtail" | Long-term  | 58.2                         | <b>0.09</b> | 5       |
| Higher tier (birds): A literature review provides a weight of evidence approach concluding to acceptable risks to birds for doses of 5 kg Cu/ha/year, for granivorous and insectivorous birds. |                                       |            |                              |             |         |
| Screening Step (Mammals)                                                                                                                                                                       |                                       |            |                              |             |         |
| All                                                                                                                                                                                            | Small herbivorous mammal              | Acute      | 818.4                        | <b>0.2</b>  | 10      |
| All                                                                                                                                                                                            | Small herbivorous mammal              | Long-term  | 433.8                        | <b>0.04</b> | 5       |
| Tier 1 (Mammals)                                                                                                                                                                               |                                       |            |                              |             |         |
| BBCH 71-89                                                                                                                                                                                     | Frugivorous mammal "rat"              | Acute      | 271.2                        | <b>0.60</b> | 10      |
| BBCH 10-19                                                                                                                                                                                     | Small insectivorous<br>mammal "shrew" | Acute      | 45.6                         | <b>3.67</b> | 10      |
| BBCH >20                                                                                                                                                                                       | Small insectivorous<br>mammal "shrew" | Acute      | 32.4                         | <b>5.02</b> | 10      |
| BBCH 10-49                                                                                                                                                                                     | Small herbivorous mammal<br>"vole"    | Acute      | 818.4                        | <b>0.20</b> | 10      |
| BBCH >50                                                                                                                                                                                       | Small herbivorous mammal<br>"vole"    | Acute      | 243.6                        | <b>0.67</b> | 10      |

| Growth stage                                                                                                                                                                                          | Indicator or focal species         | Time scale | DDD<br>(mg/kg bw per day) | TER         | Trigger |
|-------------------------------------------------------------------------------------------------------------------------------------------------------------------------------------------------------|------------------------------------|------------|---------------------------|-------------|---------|
| BBCH 10-49                                                                                                                                                                                            | Small omnivorous mammal "mouse"    | Acute      | 103.2                     | <b>1.57</b> | 10      |
| BBCH >50                                                                                                                                                                                              | Small omnivorous mammal "mouse"    | Acute      | 31.2                      | <b>5.21</b> | 10      |
| BBCH 71-89                                                                                                                                                                                            | Frugivorous mammal "rat"           | Long-term  | 151.2                     | <b>0.11</b> | 5       |
| BBCH 10-19                                                                                                                                                                                            | Small insectivorous mammal "shrew" | Long-term  | 25.2                      | <b>0.63</b> | 5       |
| BBCH >20                                                                                                                                                                                              | Small insectivorous mammal "shrew" | Long-term  | 11.4                      | <b>1.40</b> | 5       |
| BBCH 10-49                                                                                                                                                                                            | Small herbivorous mammal "vole"    | Long-term  | 433.4                     | <b>0.04</b> | 5       |
| BBCH >50                                                                                                                                                                                              | Small herbivorous mammal "vole"    | Long-term  | 130.2                     | <b>0.12</b> | 5       |
| BBCH 10-49                                                                                                                                                                                            | Small omnivorous mammal "mouse"    | Long-term  | 46.8                      | <b>0.34</b> | 5       |
| BBCH >50                                                                                                                                                                                              | Small omnivorous mammal "mouse"    | Long-term  | 13.8                      | <b>1.16</b> | 5       |
| Higher tier (Mammals): A literature review provides evidence of homeostatic mechanisms, and allows concluding to acceptable long-term risks based on weight of evidence except for large herbivorous. |                                    |            |                           |             |         |
| <b>Risk from bioaccumulation and food chain behaviour</b> [ <i>indicate when not relevant i.e if Log K<sub>ow</sub> ≤ 3</i> ]                                                                         |                                    |            |                           |             |         |
| A literature review provides evidence of lack of bioaccumulation in aquatic food chain.                                                                                                               |                                    |            |                           |             |         |
| <b>Risk from consumption of contaminated water</b>                                                                                                                                                    |                                    |            |                           |             |         |
| Scenarios                                                                                                                                                                                             | Indicator or focal species         | Time scale | PEC <sub>dw</sub> xDWR    | TER         | Trigger |
| Leaf scenario                                                                                                                                                                                         | Birds                              | acute      | Not required              |             | 5       |
| <b>Puddle scenario, Screening step</b>                                                                                                                                                                |                                    |            |                           |             |         |
| 1) Application rate (g a.s./ha)/relevant endpoint <50 (koc<500 L/kg), TER calculation not needed                                                                                                      |                                    |            |                           |             |         |
| 2) Application rate (g a.s./ha)/relevant endpoint <3000 (koc≥500 L/kg), TER calculation not needed                                                                                                    |                                    |            |                           |             |         |

### Toxicity data for all aquatic tested species (Regulation (EU) N° 283/2013, Annex Part A, points 8.2 and Regulation (EU) N° 284/2013 Annex Part A, point 10.2)\*

\* This section does not yet reflect the new EFSA Guidance Document on aquatic organisms which has been noted in the meeting of the Standing Committee on Plants, Animals, Food and Feed on 11 July 2014.

| Group              | Test substance | Time-scale<br>(Test type) | End point | Toxicity <sup>a</sup><br>(mg/L) |
|--------------------|----------------|---------------------------|-----------|---------------------------------|
| Laboratory tests ‡ |                |                           |           |                                 |
| Fish               |                |                           |           |                                 |

| Group                   | Test substance             | Time-scale<br>(Test type)   | End point                         | Toxicity <sup>a</sup><br>(mg/L)                             |
|-------------------------|----------------------------|-----------------------------|-----------------------------------|-------------------------------------------------------------|
| <i>O. mykiss</i>        | Copper hydroxide WP        | 96 hr (flow-through)        | Mortality, LC <sub>50</sub>       | 0.0165 total (mm)<br>0.0080 dissolved<br>(mm)               |
| <i>O. mykiss</i>        | Copper oxychloride         | 96 hr (flow-through)        | Mortality, LC <sub>50</sub>       | > 43.8 total (mm)<br>> 0.106 dissolved<br>(mm)              |
| <i>O. mykiss</i>        | Copper oxychloride         | 96 hr (semi-static)         | Mortality, LC <sub>50</sub>       | 0.047 dissolved<br>(mm)                                     |
| <i>O. mykiss</i>        | Copper oxychloride WP      | 96 hr (flow-through)        | Mortality, LC <sub>50</sub>       | 0.78 total (mm)<br>0.0109 dissolved<br>(mm)                 |
| <i>O. mykiss</i>        | Bordeaux mixture           | 96 hr (semi-static)         | Mortality, LC <sub>50</sub>       | > 21.39 total (mm)<br>> 0.125 dissolved<br>(mm)             |
| <i>O. mykiss</i>        | Bordeaux mixture           | 96 hr (semi-static)         | Mortality, LC <sub>50</sub>       | 0.082 total (mm)                                            |
| <i>O. mykiss</i>        | Bordeaux mixture WP        | 96 hr (semi-static)         | Mortality, LC <sub>50</sub>       | 0.052 total (mm)                                            |
| <i>O. mykiss</i>        | Tribasic copper sulfate SC | 96 hr (static)              | Mortality, LC <sub>50</sub>       | 13.18 total (mm)                                            |
| <i>C. carpio</i>        | Tribasic copper sulfate SC | 96 hr (flow-through)        | Mortality, LC <sub>50</sub>       | > 19.3 total (mm)                                           |
| <b><i>O. mykiss</i></b> | <b>Copper oxide</b>        | <b>96 hr (flow-through)</b> | <b>Mortality, LC<sub>50</sub></b> | <b>0.207 total (mm)</b><br><b>0.0344 dissolved<br/>(mm)</b> |
| <i>O. mykiss</i>        | Copper oxide WP            | 96 hr (flow-through)        | Mortality, LC <sub>50</sub>       | 0.047 total (mm)<br>0.0106 dissolved<br>(mm)                |
| <i>C. carpio</i>        | Copper oxide WG            | 96 hr (semi-static)         | Mortality, LC <sub>50</sub>       | 4.37 total (nom)                                            |
| <i>O. mykiss</i>        | Copper hydroxide WP        | ELS – 92 d                  | Growth NOEC                       | 0.0155 total (mm)<br>0.0017 dissolved<br>(mm)               |
| <i>O. mykiss</i>        | Tribasic copper sulfate SC | 21 d(flow-through)          | Growth NOEC                       | 0.97 total (nom)                                            |



| Group                                     | Test substance                                | Time-scale<br>(Test type) | End point                   | Toxicity <sup>a</sup><br>(mg/L)           |
|-------------------------------------------|-----------------------------------------------|---------------------------|-----------------------------|-------------------------------------------|
| <i>O. mykiss</i>                          | <i>Copper Hydroxide WP</i><br>(with sediment) | 48 hr (static)            | Mortality, LC <sub>50</sub> | 0.54 total (mm)<br>0.18 dissolved<br>(mm) |
| <i>D. rerio</i><br>(embryo) <sup>12</sup> | Copper hydroxide                              | 48 hr (static)            | Mortality, NOEC             | ≤ 3.2 total (nom)                         |
|                                           | Copper oxychloride                            | 48 hr (static)            | Mortality, NOEC             | 18.0 total (nom)                          |
|                                           | Bordeaux mixture                              | 48 hr (static)            | Mortality, NOEC             | 22.5 total (nom)                          |
|                                           | Tribasic copper sulfate                       | 48 hr (static)            | Mortality, NOEC             | 76.8 total (nom)                          |
|                                           | Copper oxide                                  | 48 hr (static)            | Mortality, NOEC             | 1.06 total (nom)                          |

---

labelling is formally proposed and decided in accordance with Regulation (EC) No 1272/2008.

| Group                        | Test substance                              | Time-scale<br>(Test type)  | End point                                            | Toxicity <sup>a</sup><br>(mg/L)                            |
|------------------------------|---------------------------------------------|----------------------------|------------------------------------------------------|------------------------------------------------------------|
| <i>Pimephales promelas</i>   | Copper sulfate                              | 270 d (flow-through)       | NOEC (number of eggs/spawn)                          | 0.066 mg/L (dissolved Cu)                                  |
| <i>Perca fluviatilis</i>     | Copper sulfate                              | 30 d (flow-through)        | NOEC (mortality)                                     | 0.188 mg/L (total Cu)                                      |
| <i>Perca fluviatilis</i>     | Copper sulfate                              | 18 d (flow-through)        | NOEC (growth rate)                                   | 0.022 mg/L (total Cu)                                      |
| <i>Pimephales notatus</i>    | Copper sulfate                              | 60 d (flow-through)        | NOEC (growth rate)                                   | 0.0441 mg/L (total Cu)                                     |
|                              |                                             |                            | NOEC (growth rate, mortality)                        | 0.0718 mg/L (total Cu)                                     |
|                              |                                             |                            | NOEC (reproduction)                                  | 0.0043 mg/L (total Cu)                                     |
| <i>Oncorhynchus mykiss</i>   | Copper chloride                             | 60 d (flow-through)        | NOEC = (growth) (total Cu)                           | 0.0022 mg/L (total Cu)                                     |
| <i>Salvelinus fontinalis</i> | Copper sulfate                              | 189 & 244 d (flow-through) | 244-d NOEC (growth rate, number of eggs/spawn)       | 0.0174 mg/L (growth rate, number of eggs/spawn) (total Cu) |
|                              |                                             |                            | 189-d NOEC (growth rate, mortality)                  | 0.0095 mg/L (growth rate, mortality) (total Cu)            |
| <i>Pimephales promelas</i>   | Copper sulfate                              | 330-d (flow-through)       | NOEC (growth rate, mortality)<br>NOEC (reproduction) | 0.033 mg/L (total Cu)<br>0.0145 mg/L (total Cu)            |
| <i>Pimephales promelas</i>   | Copper sulfate                              | 327-d (flow-through)       | NOEC (growth rate, mortality, reproduction)          | 0.0106 mg/L (total Cu)                                     |
| <i>Oncorhynchus kisutch</i>  | Cu <sup>2+</sup> (copper salt not reported) | 61-d (flow-through)        | NOEC (growth rate)                                   | 0.021 mg/L (dissolved Cu)                                  |
|                              |                                             |                            | NOEC (mortality)                                     | 0.018 mg/L (dissolved Cu)                                  |
| <i>Oncorhynchus mykiss</i>   |                                             | 61-d (flow-through)        | NOEC (growth rate)                                   | 0.045 mg/L (dissolved Cu)                                  |
|                              |                                             | 270 d (flow-through)       | NOEC (mortality)                                     | 0.024 mg/L (dissolved Cu)                                  |

| Group                          | Test substance | Time-scale<br>(Test type)         | End point                                                                                                                                                                | Toxicity <sup>a</sup><br>(mg/L)                                                                                           |
|--------------------------------|----------------|-----------------------------------|--------------------------------------------------------------------------------------------------------------------------------------------------------------------------|---------------------------------------------------------------------------------------------------------------------------|
| <i>Pimephales promelas</i>     | Copper sulfate | 7; 97 and 187-d<br>(flow-through) | NOEC (growth rate)<br>NOEC (eggs/female)<br>NOEC (eggs/female)<br>NOEC (eggs/female)                                                                                     | 0.0595 mg/L (total Cu)<br>0.0165 mg/L (total Cu)<br>0.023 mg/L (total Cu)<br>0.016 mg/L (total Cu)                        |
| <i>Ictalurus punctatus</i>     | Copper sulfate | 60-d (flow-through)               | NOEC (growth rate, mortality)                                                                                                                                            | 0.013 mg/L (total Cu)                                                                                                     |
| <i>Salvelinus fontinalis</i>   |                |                                   | 30-d NOEC (growth rate - soft water)<br>30-d NOEC (growth rate, mortality - hard water)<br>30-d NOEC (reproduction)<br>60-d NOEC (mortality)<br>60-d NOEC (reproduction) | 0.007 mg/L (total Cu)<br>0.021 mg/L (total Cu)<br>0.049 mg/L (total Cu)<br>0.013 mg/L (total Cu)<br>0.007 mg/L (total Cu) |
| <i>Pimephales promelas</i>     | Copper sulfate | 28-d (flow-through)               | NOEC (mortality)                                                                                                                                                         | 0.061 mg/L (total Cu)                                                                                                     |
| <i>Neomacheilus barbatulus</i> | Copper sulfate | 64-d (flow-through)               | NOEC (survival)                                                                                                                                                          | 0.120 mg/L (total Cu)                                                                                                     |
| <i>Pimephales promelas</i>     | Copper nitrate | 32-d (flow-through)               | NOEC (mortality, growth)                                                                                                                                                 | 0.0048 mg/L (total Cu)                                                                                                    |
| <i>Salvenus fontinalis</i>     | Copper sulfate | 45-d (flow-through)               | NOEC (mortality, growth)                                                                                                                                                 | 0.0114 mg/L (total Cu)                                                                                                    |
| <i>Oncorhynchus mykiss</i>     |                | 40-d (flow-through)               | NOEC (mortality, growth)                                                                                                                                                 | 0.0129 mg/L (total Cu)                                                                                                    |
| <i>Catostomus commersoni</i>   |                | 35-d (flow-through)               | NOEC (mortality, growth)                                                                                                                                                 | 0.0349 mg/L (total Cu)                                                                                                    |
| <i>Esox lucius</i>             |                | 60-d (flow-through)               | NOEC (mortality, growth)                                                                                                                                                 | 0.0223 mg/L (total Cu)                                                                                                    |

| Group                          | Test substance     | Time-scale<br>(Test type)       | End point                                                                                                                                                                                                 | Toxicity <sup>a</sup><br>(mg/L)                                                                                                                                                                                     |
|--------------------------------|--------------------|---------------------------------|-----------------------------------------------------------------------------------------------------------------------------------------------------------------------------------------------------------|---------------------------------------------------------------------------------------------------------------------------------------------------------------------------------------------------------------------|
| <i>Oncorhynchus mykiss</i>     | Copper sulfate     | 30-d (flow-through)             | LC <sub>10</sub> (mortality – pH 5.1)<br>LC <sub>10</sub> (mortality – pH 6.2)<br>LC <sub>10</sub> (mortality – pH 7.1)<br>LC <sub>10</sub> (mortality – pH 7.9)<br>LC <sub>10</sub> (mortality – pH 8.6) | 0.0038 mg/L (dissolved Cu)<br>0.0047 mg/L (dissolved Cu)<br>0.0039 mg/L (dissolved Cu)<br>0.0076 mg/L (dissolved Cu)<br>0.0161 mg/L (dissolved Cu)                                                                  |
| <i>Acipenser transmontanus</i> | Copper sulfate     | 66-d (flow-through)             | NOEC (mortality)                                                                                                                                                                                          | 0.0059 mg/L (dissolved Cu)                                                                                                                                                                                          |
| <i>Acipenser transmontanus</i> | Copper sulfate     | 14-d; 28-d; 53-d (flow-through) | 14-d LC <sub>10</sub> (mortality)<br><b>53-d EC<sub>10</sub> (growth)</b><br>28-d LC <sub>10</sub> (mortality)<br>28-d EC <sub>10</sub> (growth)<br>28-d EC <sub>10</sub> (growth)                        | 0.00183 mg/L (dissolved Cu)<br><b>0.00112 mg/L (dissolved Cu)</b><br>0.00372 mg/L (dissolved Cu)<br>0.00196 mg/L (dissolved Cu)<br>0.00203 mg/L (dissolved Cu)                                                      |
| <i>Oncorhynchus mykiss</i>     |                    |                                 | 14-d; 28-d; 53-d (flow-through)                                                                                                                                                                           | 21-d LC <sub>10</sub> (mortality)<br>52-d LC <sub>10</sub> (mortality)<br>21-d EC <sub>10</sub> (biomass)<br>28-d LC <sub>10</sub> (mortality)<br>28-d EC <sub>10</sub> (growth)<br>28-d EC <sub>10</sub> (biomass) |
| Aquatic invertebrate           |                    |                                 |                                                                                                                                                                                                           |                                                                                                                                                                                                                     |
| <i>D. magna</i>                | Copper hydroxide   | 48 h (static)                   | Mortality, LC <sub>50</sub>                                                                                                                                                                               | 0.0308 total (mm)<br><b>0.0266 dissolved (mm)</b>                                                                                                                                                                   |
| <i>D. magna</i>                | Copper oxychloride | 48 h (static)                   | Mortality, LC <sub>50</sub>                                                                                                                                                                               | 0.29 total (nom)*                                                                                                                                                                                                   |
| <i>D. magna</i>                | Bordeaux mixture   | 48 h (static)                   | Mortality, LC <sub>50</sub>                                                                                                                                                                               | 1.87 total (mm)*                                                                                                                                                                                                    |
| <i>D. magna</i>                | Copper oxide       | 48 h (static)                   | Mortality, LC <sub>50</sub>                                                                                                                                                                               | 0.45 total (nom)*                                                                                                                                                                                                   |

| Group                                             | Test substance              | Time-scale<br>(Test type)                  | End point                          | Toxicity <sup>a</sup><br>(mg/L)                            |                                           |
|---------------------------------------------------|-----------------------------|--------------------------------------------|------------------------------------|------------------------------------------------------------|-------------------------------------------|
| <i>D. magna</i>                                   | <b>Copper oxychloride</b>   | <b>21 d (semi-static)</b>                  | <b>Reproduction, NOEC</b>          | <b>0.0076 total (geometric mean measured)#</b>             |                                           |
| <i>D. magna</i>                                   | Copper oxychloride          | 21 d (semi-static)                         | Reproduction, NOEC                 | 0.059 total (nom)                                          |                                           |
| <i>D. magna</i>                                   | Tribasic copper sulfate SC  | 21 d (semi-static)                         | Reproduction, NOEC                 | 0.057 total (mm)                                           |                                           |
| <i>D. magna</i><br>(21-d studies with sediment)** | Copper hydroxide WP         | 21 d (semi-static)                         | Mortality, LC <sub>50</sub>        | 0.024 total (mm)                                           |                                           |
|                                                   |                             |                                            | Reproduction, NOEC                 | 0.0299 total (mm)                                          |                                           |
|                                                   | Copper hydroxide SC         | 21 d (semi-static)                         | Mortality, LC <sub>50</sub>        | 0.0109 total (mm)                                          |                                           |
|                                                   |                             |                                            | Reproduction, NOEC                 | 0.027 total (mm)                                           |                                           |
|                                                   | Copper oxychloride WP       | 21 d (semi-static)                         | Mortality, LC <sub>50</sub>        | 0.0298 total (mm)                                          |                                           |
|                                                   |                             |                                            | Reproduction, NOEC                 | 0.0461 total (mm)                                          |                                           |
|                                                   | Bordeaux mixture WP         | 21 d (semi-static)                         | Mortality, LC <sub>50</sub>        | 0.0198 total (mm)                                          |                                           |
|                                                   |                             |                                            | Reproduction, NOEC                 | 0.0378 total (mm)                                          |                                           |
|                                                   | Tribasic copper sulfate SC  | 21 d (semi-static)                         | Mortality, LC <sub>50</sub>        | 0.0167 total (mm)                                          |                                           |
|                                                   |                             |                                            | Reproduction, NOEC                 | 0.0334 total (mm)                                          |                                           |
|                                                   | Copper oxide WP             | 21 d (semi-static)                         | Mortality, LC <sub>50</sub>        | 0.0113 total (mm)                                          |                                           |
|                                                   |                             |                                            | Reproduction, NOEC                 | 0.0122 total (mm)                                          |                                           |
|                                                   | Sediment dwelling organisms |                                            |                                    |                                                            |                                           |
|                                                   | <i>Chironomus riparius</i>  | <b>Tribasic copper sulfate</b>             | <b>28 d (static)</b>               | <b>NOEC</b>                                                | <b>0.50 total (nom) water spiked test</b> |
| <i>Chironomus riparius</i>                        | Copper chloride             | 28 d (semi-static, spiked sediment)        | NOEC (survival)                    | NOEC = 64.27 mg/kg dry weight normalized to 2.5% OC        |                                           |
| <i>Tubifex tubifex</i>                            | Copper sulfate              | 28 d (static, spiked sediment)             | NOEC (reproduction)                | NOEC = 152.04 mg/kg dry weight normalized to 2.5% OC       |                                           |
|                                                   | <b>Copper chloride</b>      | <b>28 d (semi-static, spiked sediment)</b> | <b>NOEC (reproduction, growth)</b> | <b>NOEC = 16.17 mg/kg dry weight normalized to 2.5% OC</b> |                                           |

| Group                         | Test substance             | Time-scale<br>(Test type)                  | End point                                                                                  | Toxicity <sup>a</sup><br>(mg/L)                      |
|-------------------------------|----------------------------|--------------------------------------------|--------------------------------------------------------------------------------------------|------------------------------------------------------|
|                               | Copper chloride            | 28 d (static, spiked sediment)             | NOEC (reproduction, growth)                                                                | NOEC = 639 mg/kg dry weight normalized to 2.5% OC    |
|                               | Copper sulfate             | 28 d (static, spiked sediment)             | NOEC (Survival, autotomy, reproduction and total growth rate)                              | NOEC = 243.97 mg/kg dry weight normalized to 2.5% OC |
| <i>Hyalella azteca</i>        | Copper chloride            | 28 d (semi-static, spiked sediment)        | NOEC (growth)                                                                              | NOEC = 25.70 mg/kg dry weight normalized to 2.5% OC  |
| <i>Lumbriculus variegatus</i> | Copper chloride            | 28 d (semi-static, spiked sediment)        | NOEC (biomass)                                                                             | NOEC = 76.82 mg/kg dry weight normalized to 2.5% OC  |
| <i>Gammarus pulex</i>         | Copper chloride            | 35 d (semi-static, spiked sediment)        | NOEC (survival)                                                                            | NOEC = 27.04 mg/kg dry weight normalized to 2.5% OC  |
| <i>Hyalella azteca</i>        | Copper chloride            | 28 d (semi-static, spiked sediment)        | NOEC (growth)                                                                              | NOEC = 50.77 mg/kg dry weight normalized to 2.5% OC  |
| <i>Hexagenia spp.</i>         | Copper chloride            | 21 d (semi-static, spiked sediment)        | NOEC (growth)                                                                              | NOEC = 116.99 mg/kg dry weight normalized to 2.5% OC |
| <i>Bellamyia aeruginosa</i>   | Copper sulfate             | 21 d (continuous renewal, spiked sediment) | NOEC (fecundity)                                                                           | NOEC = 48.34 mg/kg dry weight normalized to 2.5% OC  |
| Algae                         |                            |                                            |                                                                                            |                                                      |
| <i>S. capricornutum</i>       | <b>Copper hydroxide WP</b> | <b>72 h (static)</b>                       | Biomass: E <sub>b</sub> C <sub>50</sub><br><b>Growth rate: E<sub>r</sub>C<sub>50</sub></b> | 0.00939 total (nom)<br><b>0.02229 total (nom)</b>    |
| <i>S. subspicatus</i>         | Copper oxychloride         | 72 h (static)                              | Biomass: E <sub>b</sub> C <sub>50</sub><br>Growth rate: E <sub>r</sub> C <sub>50</sub>     | 49.81 total (mm)<br>> 165.9 total (mm)               |

| Group                                                                                                                                                                                                                                                                                                                                                                                                                                                                                                                                                                                                                                                                                      | Test substance             | Time-scale<br>(Test type)                                                 | End point                                                                                                                                                                        | Toxicity <sup>a</sup><br>(mg/L)                                                                       |
|--------------------------------------------------------------------------------------------------------------------------------------------------------------------------------------------------------------------------------------------------------------------------------------------------------------------------------------------------------------------------------------------------------------------------------------------------------------------------------------------------------------------------------------------------------------------------------------------------------------------------------------------------------------------------------------------|----------------------------|---------------------------------------------------------------------------|----------------------------------------------------------------------------------------------------------------------------------------------------------------------------------|-------------------------------------------------------------------------------------------------------|
| <i>D. subspicatus</i>                                                                                                                                                                                                                                                                                                                                                                                                                                                                                                                                                                                                                                                                      | Bordeaux mixture WP        | 72 h (static)                                                             | Biomass: E <sub>b</sub> C <sub>50</sub><br>Growth rate: E <sub>r</sub> C <sub>50</sub><br>Biomass: E <sub>b</sub> C <sub>10</sub><br>Growth rate: E <sub>r</sub> C <sub>10</sub> | 0.64 mg /L total (nom)<br>11.55 mg /L total (nom)<br>0.07 mg /L total (nom)<br>5.54 mg /L total (nom) |
| <i>P. subcapitata</i>                                                                                                                                                                                                                                                                                                                                                                                                                                                                                                                                                                                                                                                                      | Copper oxide WP            | 72 h (static)                                                             | Biomass: E <sub>b</sub> C <sub>50</sub><br>Growth rate: E <sub>r</sub> C <sub>50</sub><br>Biomass: E <sub>b</sub> C <sub>50</sub><br>Growth rate: E <sub>r</sub> C <sub>50</sub> | 0.147 total (mm)<br>0.299 total (mm)<br>0.045 dissolved (mm)<br>0.133 dissolved (mm)                  |
| Microcosm or mesocosm tests                                                                                                                                                                                                                                                                                                                                                                                                                                                                                                                                                                                                                                                                |                            |                                                                           |                                                                                                                                                                                  |                                                                                                       |
| <b>Indoor microcosm study</b>                                                                                                                                                                                                                                                                                                                                                                                                                                                                                                                                                                                                                                                              | <b>Copper hydroxide WP</b> | <b>6 applications at 10-d interval followed by 250 days of monitoring</b> | <b>NOEC</b>                                                                                                                                                                      | 0.012 total (nom)<br><b>0.0048 dissolved (mm)<sup>b</sup> (AF = 2 applied)</b>                        |
| Outdoor mesocosm study including fish                                                                                                                                                                                                                                                                                                                                                                                                                                                                                                                                                                                                                                                      | Copper sulfate             | 18 months (flow-through)                                                  | NOEC community                                                                                                                                                                   | 5 µg/L (total Cu)<br>4 µg/L (dissolved Cu)                                                            |
| <p><i>Further testing on aquatic organisms</i></p> <p>Fish, acute, data from 7 fish species available from the literature were used. Therefore, this allows to derived a SSD-HC<sub>5</sub> values of 3.73 µg/L, an AF of 3 is applied.</p> <p>Fish, chronic (based on SSD analysis SSD-HC<sub>5</sub> = 0.00111 mg/L (AF = 43</p> <p>Sediment dwelling organisms (based on toxicity dataset and due considerations of sediment properties) lowest available endpoint = 16.17 mg/kg normalized for 2.5% OC. Considering that data for 5 additional species are available (besides the tier 1 <i>Chironomus riparius</i> and <i>Hyallolella Azteca</i> species) an AF = 5 has been set.</p> |                            |                                                                           |                                                                                                                                                                                  |                                                                                                       |
| <p><i>Potential endocrine disrupting properties (Annex Part A, point 8.2.3)</i></p> <p>No information highlights any ED property of copper.</p>                                                                                                                                                                                                                                                                                                                                                                                                                                                                                                                                            |                            |                                                                           |                                                                                                                                                                                  |                                                                                                       |

<sup>a</sup> (nom) nominal concentration; (mm) mean measured concentration; prep.: preparation; a.s.: active substance

# according to the study summary, this study was performed following the guideline OECD 202 and not according to the OECD 211. The full compliance to one of the validity criteria of the OECD 211 could not be confirmed from the information available in the RAR; it is reported that the cumulative number of offspring per female was >40 on day 21, according to the validity criteria the mean number of living offspring produced per parent animal surviving at the end of the test should be > 60. It is noted that in the study summary it is mentioned that this validity criteria cannot be accurately estimated with the test method that was followed.

\* The dilution medium used in this study is the Elendt M4 medium which contains EDTA. This chelating agent is known to have an outcome on the biological result as it chelates metals such as copper. Therefore, the results from this study should not be used for the purpose of risk assessment.

\*\* Study done in presence of sediment. According to the EFSA aquatic guidance in order to use thi study in the risk assessment a comparison with the predicted exposure scenaris should be performed to demonstrate that the exposure cover the worst case, a full comparison was not done, however, this estudy was not used in the risk assessment.

**Bioconcentration in fish (Annex Part A, point 8.2.2.3)**

|                                                                                                 | Active substance                                                 |
|-------------------------------------------------------------------------------------------------|------------------------------------------------------------------|
| logP <sub>O/W</sub>                                                                             | -                                                                |
| Steady-state bioconcentration factor (BCF)<br>(total wet weight/normalised to 5% lipid content) | A literature review provides evidence of lack of bioaccumulation |
| Uptake/depuration kinetics BCF<br>(total wet weight/normalised to 5% lipid content)             | -                                                                |
| Annex VI Trigger for the bioconcentration factor                                                | -                                                                |
| Clearance time (days) (CT <sub>50</sub> )                                                       | -                                                                |
| (CT <sub>90</sub> )                                                                             | -                                                                |
| Level and nature of residues (%) in organisms after the 14 day depuration phase                 | -                                                                |
| Higher tier study                                                                               |                                                                  |
| -                                                                                               |                                                                  |

\* based on total <sup>14</sup>C or on specific compounds



**Toxicity/exposure ratios for the most sensitive aquatic organisms (Regulation (EU) N° 284/2013, Annex Part A, point 10.2)**

**NSZ: No-spray buffer zone**

**VBZ: Vegetative buffer zone**

First and second-tier **RAC<sub>sw;ac</sub>** value for **fish** for copper compared to relevant maximum **PEC<sub>sw</sub>** values for Copper at Step 1 and Step 2 (All entry routes to water bodies considered);

| Uses                 | Application pattern     | Season of application | Region | Step 1                   | RAC <sub>sw; ac</sub> (= 0.34 µg/L)<br>PEC>RAC | Step 2                   | RAC <sub>sw; ac</sub> (= 0.34 µg/L)<br>PEC>RAC | SSD-RAC <sub>sw; ac</sub> (= 1.24 µg/L)<br>PEC>RAC |
|----------------------|-------------------------|-----------------------|--------|--------------------------|------------------------------------------------|--------------------------|------------------------------------------------|----------------------------------------------------|
|                      |                         |                       |        | PEC <sub>sw</sub> (µg/L) |                                                | PEC <sub>sw</sub> (µg/L) |                                                |                                                    |
| Leafy vegetables     | 1 x 850 g/ha            | Mar.-May              | N      | 13.95                    | Yes                                            | 7.82                     | Yes                                            | Yes                                                |
|                      |                         |                       | S      |                          |                                                | 7.82                     |                                                |                                                    |
|                      | 7 x 850 g/ha (7 days)   |                       | N      | 97.63                    | Yes                                            | 9.47                     |                                                |                                                    |
|                      |                         |                       | S      |                          |                                                | 17.9                     |                                                |                                                    |
| Vines, late applns.  | 1 x 1250 g/ha           | Oct.-Feb.             | N      | 42.46                    | Yes                                            | 33.45                    |                                                |                                                    |
|                      |                         |                       | S      |                          |                                                | 33.45                    |                                                |                                                    |
|                      | 3 x 1250 g/ha (7 days)  |                       | N      | 127.39                   | Yes                                            | 30.55                    |                                                |                                                    |
|                      |                         |                       | S      |                          |                                                | 30.55                    |                                                |                                                    |
|                      | 4 x 1250 g/ha (21 days) |                       | N      | 169.86                   | Yes                                            | 30.27                    |                                                |                                                    |
|                      |                         |                       | S      |                          |                                                | 30.27                    |                                                |                                                    |
| Vines, early applns. | 1 x 1250 g/ha           | Mar.-May              | N      | 20.26                    | Yes                                            | 11.25                    |                                                |                                                    |
|                      |                         |                       | S      |                          |                                                | 11.25                    |                                                |                                                    |
|                      | 6*1250 (7 days)         |                       | N      | 121.56                   | Yes                                            | 12.61                    |                                                |                                                    |
|                      |                         |                       | S      |                          |                                                | 23.27                    |                                                |                                                    |

Greenhouse uses

| Uses | Growth Stage | Number of | Maximum | Buffer | Drift Rate From | PEC <sub>sw</sub> | RAC <sub>sw; ac</sub> (= 0.34 µg/L) | SSD-RAC <sub>sw; ac</sub> (= 1.24 µg/L) |
|------|--------------|-----------|---------|--------|-----------------|-------------------|-------------------------------------|-----------------------------------------|
|------|--------------|-----------|---------|--------|-----------------|-------------------|-------------------------------------|-----------------------------------------|

|                         | Applica<br>tions | Applica<br>tion<br>Rate | FOCUS<br>ditch  | [µg/L] | PEC>RAC | PEC>RAC |     |           |
|-------------------------|------------------|-------------------------|-----------------|--------|---------|---------|-----|-----------|
|                         | BBCH             | [-]                     | [g a.s.<br>/ha] | [m]    | [%]     |         |     |           |
| Tomatoes<br>& Cucumbers | oct-89           | 1                       | 1250            | -      | 0.1     | 0.42    | Yes | <b>No</b> |
| Tomatoes<br>& Cucumbers | oct-89           | 1                       | 6,000           | -      | 0.1     | 2       | Yes | Yes       |

\* Values going beyond 95% mitigation are not included, also true for NSZ above 20 m

RMS underlines that it is not possible to consider unsprayed buffer zones higher than 20 m since such mitigations can exceed the trigger value of 95% mitigation.

First and second-tier **RAC<sub>sw;ac</sub>** value for **fish** for copper compared to relevant maximum PEC<sub>sw</sub> values for Copper at Step 1 and Step 2 (All entry routes to water bodies considered and the highest acceptable mitigation measure);

| Uses               | Application<br>pattern        | Scenario | PEC <sub>sw</sub> Step 2,<br>Runoff/Drainage<br>Including 90%<br>reduction | PEC <sub>sw</sub><br>Step 2,<br>Drift<br>Including<br>NSZ 20 m | Total<br>VBZ 20 m +<br>NSZ 20m | RAC <sub>sw</sub> ;<br>ac (= 0.34<br>µg/L)<br>PEC>RAC | SSD-<br>RAC <sub>sw</sub> ;<br>ac (= 1.24<br>µg/L)<br>PEC>RAC |
|--------------------|-------------------------------|----------|----------------------------------------------------------------------------|----------------------------------------------------------------|--------------------------------|-------------------------------------------------------|---------------------------------------------------------------|
| Leafy vegetables   | 1 x 850 g/ha                  | N        | 0.122                                                                      | 0.42                                                           | 0.54                           | Yes                                                   | <b>No</b>                                                     |
|                    |                               | S        | 0.245                                                                      | 0.42                                                           | 0.66                           | Yes                                                   | <b>No</b>                                                     |
|                    | 7 x 850 g/ha<br>(7 days)      | N        | 0.843                                                                      | 0.28                                                           | 1.12                           | Yes                                                   | <b>No</b>                                                     |
|                    |                               | S        | 1.687                                                                      | 0.28                                                           | 1.97                           | Yes                                                   | Yes                                                           |
| Vines, late appl.  | 1 x 1250<br>g/ha              | N        | 0.449                                                                      | 1.72                                                           | 2.17                           | Yes                                                   | Yes                                                           |
|                    |                               | S        | 0.36                                                                       | 1.72                                                           | 2.08                           | Yes                                                   | Yes                                                           |
|                    | 3 x 1250<br>g/ha<br>(7 days)  | N        | 1.329                                                                      | 1.51                                                           | 2.84                           | Yes                                                   | Yes                                                           |
|                    |                               | S        | 1.063                                                                      | 1.51                                                           | 2.58                           | Yes                                                   | Yes                                                           |
|                    | 4 x 1250<br>g/ha<br>(21 days) | N        | 1.785                                                                      | 1.53                                                           | 3.31                           | Yes                                                   | Yes                                                           |
|                    |                               | S        | 1.428                                                                      | 1.53                                                           | 2.95                           | Yes                                                   | Yes                                                           |
| Vines, early appli | 1 x 1250                      | N        | 0.18                                                                       | 0.53                                                           | 0.71                           | Yes                                                   | <b>No</b>                                                     |

|  |          |   |       |      |      |     |    |
|--|----------|---|-------|------|------|-----|----|
|  | g/ha     | S | 0.36  | 0.53 | 0.89 | Yes | No |
|  | 6*1250   | N | 1.066 | -*   | -    | -   | -  |
|  | (7 days) | S | 2.131 | -*   | -    | -   | -  |

\* no reliable PEC<sub>sw</sub> available since values going beyond 95% mitigation for drift exposure

| Uses             | Application pattern | Season of application | Region | PEC <sub>sw</sub> Step 2, Runoff/Drainage Including 90% reduction | PEC <sub>sw</sub> Step 2, Drift Including NSZ 20 m | Total VBZ 20 m + NSZ 20m | RAC <sub>sw</sub> ; ac (= 0.34 µg/L) PEC>RAC | SSD-RAC <sub>sw</sub> ; ac (= 1.24 µg/L) PEC>RAC |
|------------------|---------------------|-----------------------|--------|-------------------------------------------------------------------|----------------------------------------------------|--------------------------|----------------------------------------------|--------------------------------------------------|
| Leafy vegetables | 1 x 6000 g/ha       | Mar.-May              | N      | 0.863                                                             | 0.42                                               | 1.28                     | Yes                                          | Yes                                              |
|                  |                     |                       | S      | 1.726                                                             | 0.42                                               | 2.14                     | Yes                                          | Yes                                              |
| Vines            | 1 x 6000 g/ha       | Oct.-Feb.             | N      | 2.157                                                             | 1.72                                               | 3.88                     | Yes                                          | Yes                                              |
|                  |                     |                       | S      | 1.726                                                             | 1.72                                               | 3.45                     | Yes                                          | Yes                                              |
|                  | N                   |                       | 2.876  | 1.72                                                              | 4.6                                                | Yes                      | Yes                                          |                                                  |
|                  | S                   |                       | 2.301  | 1.72                                                              | 4.02                                               | Yes                      | Yes                                          |                                                  |

First and second-tier RAC<sub>sw,ch</sub> value for **fish** for copper compared to relevant maximum PEC<sub>sw</sub> values for Copper at Step 1 and Step 2 (All entry routes to water bodies considered);

| Uses             | Application pattern | Season of application | Region | Step 1            | RAC <sub>sw</sub> ; aech (= 0.112 µg/L) PEC>RAC<br><br>SSD-RAC <sub>sw</sub> ; ac (= 0.37 µg/L) PEC>RAC | Step 2            | RAC <sub>sw</sub> ; aech (= 0.112 µg/L) PEC>RAC | SSD-RAC <sub>sw</sub> ; aech (= 0.37 µg/L) PEC>RAC |
|------------------|---------------------|-----------------------|--------|-------------------|---------------------------------------------------------------------------------------------------------|-------------------|-------------------------------------------------|----------------------------------------------------|
|                  |                     |                       |        | PEC <sub>sw</sub> |                                                                                                         | PEC <sub>sw</sub> |                                                 |                                                    |
| Leafy vegetables | 1 x 850 g/ha        | Mar.-May              | N      | 13.95             | Yes                                                                                                     | 7.82              | Yes                                             | Yes                                                |
|                  |                     |                       | S      |                   |                                                                                                         | 7.82              |                                                 |                                                    |

|                      |                         |           |   |        |     |       |
|----------------------|-------------------------|-----------|---|--------|-----|-------|
|                      | 7 x 850 g/ha (7 days)   |           | N | 97.63  | Yes | 9.47  |
|                      |                         |           | S |        |     | 17.9  |
| Vines, late applns.  | 1 x 1250 g/ha           | Oct.-Feb. | N | 42.46  | Yes | 33.45 |
|                      |                         |           | S |        |     | 33.45 |
|                      | 3 x 1250 g/ha (7 days)  |           | N | 127.39 | Yes | 30.55 |
|                      |                         |           | S |        |     | 30.55 |
|                      | 4 x 1250 g/ha (21 days) |           | N | 169.86 | Yes | 30.27 |
|                      |                         |           | S |        |     | 30.27 |
| Vines, early applns. | 1 x 1250 g/ha           | Mar.-May  | N | 20.26  | Yes | 11.25 |
|                      |                         |           | S |        |     | 11.25 |
|                      | 6*1250 (7 days)         |           | N | 121.56 | Yes | 12.61 |
|                      |                         |           | S |        |     | 23.27 |

Greenhouse uses

| Uses                 | Growth Stage | Number of Applications | Maximum Application Rate | Buffer | Drift Rate From FOCUS ditch | PEC <sub>sw</sub> [µg/L] | RAC <sub>sw; ch</sub> (= 0.112 µg/L)<br>PEC>RAC | SSD-RAC <sub>sw; ch</sub> (= 0.37 µg/L)<br>PEC>RAC |
|----------------------|--------------|------------------------|--------------------------|--------|-----------------------------|--------------------------|-------------------------------------------------|----------------------------------------------------|
|                      | BBCH         | [-]                    | [g a.s./ha]              | [m]    | [%]                         |                          |                                                 |                                                    |
| Tomatoes & Cucumbers | oct-89       | 1                      | 1250                     | -      | 0.1                         | 0.42                     | Yes                                             | Yes                                                |
| Tomatoes & Cucumbers | oct-89       | 1                      | 6,000                    | -      | 0.1                         | 2                        | Yes                                             | Yes                                                |

\* Values going beyond 95% mitigation are not included, also true for NSZ above 20 m

RMS underlines that it is not possible to consider unsprayed buffer zones higher than 20 m since such mitigations can exceed the trigger value of 95% mitigation.

First and second-tier RAC<sub>sw;ch</sub> value for fish for copper compared to relevant maximum PEC<sub>sw</sub> values for Copper at Step 1 and Step 2 (All entry routes to water bodies considered and the highest acceptable mitigation measure);

| Uses | Application | Scenario | PEC <sub>sw</sub> Step 2, | PEC <sub>sw</sub> | Total | RAC <sub>sw;</sub> | SSD- |
|------|-------------|----------|---------------------------|-------------------|-------|--------------------|------|
|------|-------------|----------|---------------------------|-------------------|-------|--------------------|------|

|                    | pattern                 |   | Runoff/Drainage Including 90% reduction | Step 2, Drift Including NSZ 20 m | VBZ 20 m + NSZ 20m | ch (= 0.112 µg/L) PEC>RAC | RACsw; ch (= 0.37 µg/L) PEC>RAC |
|--------------------|-------------------------|---|-----------------------------------------|----------------------------------|--------------------|---------------------------|---------------------------------|
| Leafy vegetables   | 1 x 850 g/ha            | N | 0.122                                   | 0.42                             | 0.54               | Yes                       | Yes                             |
|                    |                         | S | 0.245                                   | 0.42                             | 0.66               | Yes                       | Yes                             |
|                    | 7 x 850 g/ha (7 days)   | N | 0.843                                   | 0.28                             | 1.12               | Yes                       | Yes                             |
|                    |                         | S | 1.687                                   | 0.28                             | 1.97               | Yes                       | Yes                             |
| Vines, late appl.  | 1 x 1250 g/ha           | N | 0.449                                   | 1.72                             | 2.17               | Yes                       | Yes                             |
|                    |                         | S | 0.36                                    | 1.72                             | 2.08               | Yes                       | Yes                             |
|                    | 3 x 1250 g/ha (7 days)  | N | 1.329                                   | 1.51                             | 2.84               | Yes                       | Yes                             |
|                    |                         | S | 1.063                                   | 1.51                             | 2.58               | Yes                       | Yes                             |
|                    | 4 x 1250 g/ha (21 days) | N | 1.785                                   | 1.53                             | 3.31               | Yes                       | Yes                             |
|                    |                         | S | 1.428                                   | 1.53                             | 2.95               | Yes                       | Yes                             |
| Vines, early appli | 1 x 1250 g/ha           | N | 0.18                                    | 0.53                             | 0.71               | Yes                       | Yes                             |
|                    |                         | S | 0.36                                    | 0.53                             | 0.89               | Yes                       | Yes                             |
|                    | 6*1250 (7 days)         | N | 1.066                                   | -*                               | -                  | -                         | -                               |
|                    |                         | S | 2.131                                   | -*                               | -                  | -                         | -                               |

\* no reliable PECsw available since values going beyond 95% mitigation for drift exposure

| Uses             | Application pattern | Season of application | Region | PECsw Step 2, Runoff/Drainage Including 90% reduction | PECsw Step 2, Drift Including NSZ 20 m | Total VBZ 20 m + NSZ 20m | RACsw; ch (= 0.112 µg/L) PEC>RAC | SSD-RACsw; ch (= 0.37 µg/L) PEC>RAC |
|------------------|---------------------|-----------------------|--------|-------------------------------------------------------|----------------------------------------|--------------------------|----------------------------------|-------------------------------------|
| Leafy vegetables | 1 x 6000 g/ha       | Mar.-May              | N      | 0.863                                                 | 0.42                                   | 1.28                     | Yes                              | Yes                                 |
|                  |                     |                       | S      | 1.726                                                 | 0.42                                   | 2.14                     | Yes                              | Yes                                 |
| Vines            | 1 x 6000 g/ha       | Oct.-Feb.             | N      | 2.157                                                 | 1.72                                   | 3.88                     | Yes                              | Yes                                 |
|                  |                     |                       | S      | 1.726                                                 | 1.72                                   | 3.45                     | Yes                              | Yes                                 |

|  |               |   |       |      |      |     |     |
|--|---------------|---|-------|------|------|-----|-----|
|  | 1 x 8000 g/ha | N | 2.876 | 1.72 | 4.6  | Yes | Yes |
|  |               | S | 2.301 | 1.72 | 4.02 | Yes | Yes |

Refined **ETO-RAC<sub>sw,ch</sub>** value for **aquatic invertebrates** and **algae** for copper compared to relevant maximum PEC<sub>sw</sub> values for Copper at Step 1 and Step 2 (All entry routes to water bodies considered);

| Uses                 | Application pattern     | Season of application | Region | Step 1                   | ETO-RAC <sub>sw</sub> ; ch (= 2.4 µg/L) PEC>RAC | Step 2                   | ETO-RAC <sub>sw</sub> ; ch (= 2.4 µg/L) PEC>RAC |
|----------------------|-------------------------|-----------------------|--------|--------------------------|-------------------------------------------------|--------------------------|-------------------------------------------------|
|                      |                         |                       |        | PEC <sub>sw</sub> (µg/L) |                                                 | PEC <sub>sw</sub> (µg/L) |                                                 |
| Leafy vegetables     | 1 x 850 g/ha            | Mar.-May              | N      | 13.95                    | Yes                                             | 7.82                     | Yes                                             |
|                      |                         |                       | S      |                          |                                                 | 7.82                     |                                                 |
|                      | 7 x 850 g/ha (7 days)   |                       | N      | 97.63                    | Yes                                             | 9.47                     |                                                 |
|                      |                         |                       | S      |                          |                                                 | 17.9                     |                                                 |
| Vines, late applns.  | 1 x 1250 g/ha           | Oct.-Feb.             | N      | 42.46                    | Yes                                             | 33.45                    |                                                 |
|                      |                         |                       | S      |                          |                                                 | 33.45                    |                                                 |
|                      | 3 x 1250 g/ha (7 days)  |                       | N      | 127.39                   | Yes                                             | 30.55                    |                                                 |
|                      |                         |                       | S      |                          |                                                 | 30.55                    |                                                 |
|                      | 4 x 1250 g/ha (21 days) |                       | N      | 169.86                   | Yes                                             | 30.27                    |                                                 |
|                      |                         |                       | S      |                          |                                                 | 30.27                    |                                                 |
| Vines, early applns. | 1 x 1250 g/ha           | Mar.-May              | N      | 20.26                    | Yes                                             | 11.25                    |                                                 |
|                      |                         |                       | S      |                          |                                                 | 11.25                    |                                                 |
|                      | 6*1250 (7 days)         |                       | N      | 121.56                   | Yes                                             | 12.61                    |                                                 |
|                      |                         |                       | S      |                          |                                                 | 23.27                    |                                                 |

Greenhouse uses

| Uses | Growth Stage | Number of Applications | Maximum Application Rate | Buffer | Drift Rate From FOCUS ditch | PEC <sub>sw</sub> [µg/L] | ETO-RAC <sub>sw</sub> ; ch (= 2.4 µg/L) PEC>RAC |
|------|--------------|------------------------|--------------------------|--------|-----------------------------|--------------------------|-------------------------------------------------|
|------|--------------|------------------------|--------------------------|--------|-----------------------------|--------------------------|-------------------------------------------------|

|                      | BBCH   | [-] | [g a.s./ha] | [m] | [%] |      |           |
|----------------------|--------|-----|-------------|-----|-----|------|-----------|
| Tomatoes & Cucumbers | oct-89 | 1   | 1250        | -   | 0.1 | 0.42 | <b>No</b> |
| Tomatoes & Cucumbers | oct-89 | 1   | 6,000       | -   | 0.1 | 2    | <b>No</b> |

| Uses               | Application pattern     | Scenario | PEC <sub>sw</sub> Step 2, Runoff/Drainage Including 90% reduction | PEC <sub>sw</sub> Step 2, Drift Including NSZ 20 m | Total VBZ 20 m + NSZ 20m | ETO-RAC <sub>sw</sub> ; ch (= 2.4 µg/L) PEC>RAC |
|--------------------|-------------------------|----------|-------------------------------------------------------------------|----------------------------------------------------|--------------------------|-------------------------------------------------|
| Leafy vegetables   | 1 x 850 g/ha            | N        | 0.122                                                             | 0.42                                               | 0.54                     | <b>No</b>                                       |
|                    |                         | S        | 0.245                                                             | 0.42                                               | 0.66                     | <b>No</b>                                       |
|                    | 7 x 850 g/ha (7 days)   | N        | 0.843                                                             | 0.28                                               | 1.12                     | <b>No</b>                                       |
|                    |                         | S        | 1.687                                                             | 0.28                                               | 1.97                     | <b>No</b>                                       |
| Vines, late appl.  | 1 x 1250 g/ha           | N        | 0.449                                                             | 1.72                                               | 2.17                     | <b>No</b>                                       |
|                    |                         | S        | 0.36                                                              | 1.72                                               | 2.08                     | <b>No</b>                                       |
|                    | 3 x 1250 g/ha (7 days)  | N        | 1.329                                                             | 1.51                                               | 2.84                     | Yes                                             |
|                    |                         | S        | 1.063                                                             | 1.51                                               | 2.58                     | Yes                                             |
|                    | 4 x 1250 g/ha (21 days) | N        | 1.785                                                             | 1.53                                               | 3.31                     | Yes                                             |
|                    |                         | S        | 1.428                                                             | 1.53                                               | 2.95                     | Yes                                             |
| Vines, early appli | 1 x 1250 g/ha           | N        | 0.18                                                              | 0.53                                               | 0.71                     | <b>No</b>                                       |
|                    |                         | S        | 0.36                                                              | 0.53                                               | 0.89                     | <b>No</b>                                       |
|                    | 6*1250 (7 days)         | N        | 1.066                                                             | -*                                                 | -                        | -                                               |
|                    |                         | S        | 2.131                                                             | -*                                                 | -                        | -                                               |

\* no reliable PEC<sub>sw</sub> available since values going beyond 95% mitigation for drift exposure

| Uses             | Application pattern | Season of application | Region | PECsw Step 2, Runoff/Drainage Including 90% reduction | PECsw Step 2, Drift Including NSZ 20 m | Total VBZ 20 m + NSZ 20m | ETO-RACsw ; ch (= 2.4 µg/L) PEC>RAC |
|------------------|---------------------|-----------------------|--------|-------------------------------------------------------|----------------------------------------|--------------------------|-------------------------------------|
| Leafy vegetables | 1 x 6000 g/ha       | Mar.-May              | N      | 0.863                                                 | 0.42                                   | 1.28                     | <b>No</b>                           |
|                  |                     |                       | S      | 1.726                                                 | 0.42                                   | 2.14                     | <b>No</b>                           |
| Vines            | 1 x 6000 g/ha       | Oct.-Feb.             | N      | 2.157                                                 | 1.72                                   | 3.88                     | Yes                                 |
|                  |                     |                       | S      | 1.726                                                 | 1.72                                   | 3.45                     | Yes                                 |
|                  | 1 x 8000 g/ha       |                       | N      | 2.876                                                 | 1.72                                   | 4.6                      | Yes                                 |
|                  |                     |                       | S      | 2.301                                                 | 1.72                                   | 4.02                     | Yes                                 |

First-tier  $RAC_{sed;ch}$  value **sediment-dwelling organisms** for copper compared to relevant maximum PECsw values for Copper at Step 1 and Step 2 (All entry routes to water bodies considered);

| Uses                 | Application pattern     | Season of application | Region | Step 1       | RACsed ; ch (=50 µg/L) PEC>RAC | Step 2       | RACsed ; ch (=50 µg/L) PEC>RAC |
|----------------------|-------------------------|-----------------------|--------|--------------|--------------------------------|--------------|--------------------------------|
|                      |                         |                       |        | PECsw (µg/L) |                                | PECsw (µg/L) |                                |
| Leafy vegetables     | 1 x 850 g/ha            | Mar.-May              | N      | 13.95        | <b>No</b>                      | -            | <b>No</b>                      |
|                      |                         |                       | S      |              |                                | -            |                                |
|                      | 7 x 850 g/ha (7 days)   |                       | N      | 97.63        | Yes                            | 9.47         |                                |
|                      |                         |                       | S      |              |                                | 17.9         |                                |
| Vines, late applns.  | 1 x 1250 g/ha           | Oct.-Feb.             | N      | 42.46        | <b>No</b>                      | -            |                                |
|                      |                         |                       | S      |              |                                | -            |                                |
|                      | 3 x 1250 g/ha (7 days)  |                       | N      | 127.39       | Yes                            | 30.55        |                                |
|                      |                         |                       | S      |              |                                | 30.55        |                                |
|                      | 4 x 1250 g/ha (21 days) |                       | N      | 169.86       | Yes                            | 30.27        |                                |
|                      |                         |                       | S      |              |                                | 30.27        |                                |
| Vines, early applns. | 1 x 1250 g/ha           | Mar.-May              | N      | 20.26        | <b>No</b>                      | -            |                                |
|                      |                         |                       | S      |              |                                | -            |                                |



|  |                 |  |   |        |     |       |  |
|--|-----------------|--|---|--------|-----|-------|--|
|  | 6*1250 (7 days) |  | N | 121.56 | Yes | 12.61 |  |
|  |                 |  | S |        |     | 23.27 |  |

Greenhouse uses

| Uses                 | Growth Stage | Number of Applications | Maximum Application Rate | Buffer | Drift Rate From FOCUS ditch | PEC <sub>sw</sub> [µg/L] | RAC <sub>sed ; ch</sub> (=50 µg/L) PEC>RAC |
|----------------------|--------------|------------------------|--------------------------|--------|-----------------------------|--------------------------|--------------------------------------------|
|                      | BBCH         | [-]                    | [g a.s./ha]              | [m]    | [%]                         |                          |                                            |
| Tomatoes & Cucumbers | oct-89       | 1                      | 1250                     | -      | 0.1                         | 0.42                     | No                                         |
| Tomatoes & Cucumbers | oct-89       | 1                      | 6,000                    | -      | 0.1                         | 2                        | No                                         |

\* Values going beyond 95% mitigation are not included, also true for NSZ above 20 m

RMS underlines that it is not possible to consider unsprayed buffer zones higher than 20 m since such mitigations can exceed the trigger value of 95% mitigation.

First-tier RAC<sub>sed;ch</sub> value **sediment-dwelling organisms** for copper compared to relevant maximum PEC<sub>sw</sub> values for Copper at Step 1 and Step 2 (All entry routes to water bodies considered and the highest acceptable mitigation measure);

| Uses              | Application pattern   | Scenario | PEC <sub>sw</sub> Step 2, Runoff/Drainage Including 90% reduction | PEC <sub>sw</sub> Step 2, Drift Including NSZ 20 m | Total VBZ 20 m + NSZ 20m | RAC <sub>sed ; ch</sub> (=50 µg/L) PEC>RAC |
|-------------------|-----------------------|----------|-------------------------------------------------------------------|----------------------------------------------------|--------------------------|--------------------------------------------|
| Leafy vegetables  | 1 x 850 g/ha          | N        | 0.122                                                             | 0.42                                               | 0.54                     | No                                         |
|                   |                       | S        | 0.245                                                             | 0.42                                               | 0.66                     | No                                         |
|                   | 7 x 850 g/ha (7 days) | N        | 0.843                                                             | 0.28                                               | 1.12                     | No                                         |
|                   |                       | S        | 1.687                                                             | 0.28                                               | 1.97                     | No                                         |
| Vines, late appl. | 1 x 1250              | N        | 0.449                                                             | 1.72                                               | 2.17                     | No                                         |

|                    |                 |   |       |      |      |    |
|--------------------|-----------------|---|-------|------|------|----|
|                    | g/ha            | S | 0.36  | 1.72 | 2.08 | No |
|                    | 3 x 1250 g/ha   | N | 1.329 | 1.51 | 2.84 | No |
|                    | (7 days)        | S | 1.063 | 1.51 | 2.58 | No |
|                    | 4 x 1250 g/ha   | N | 1.785 | 1.53 | 3.31 | No |
|                    | (21 days)       | S | 1.428 | 1.53 | 2.95 | No |
| Vines, early appli | 1 x 1250 g/ha   | N | 0.18  | 0.53 | 0.71 | No |
|                    |                 | S | 0.36  | 0.53 | 0.89 | No |
|                    | 6*1250 (7 days) | N | 1.066 | -*   | -    | -  |
|                    |                 | S | 2.131 | -*   | -    | -  |

\* no reliable PECsw available since values going beyond 95% mitigation for drift exposure

| Uses             | Application pattern | Season of application | Region | PECsw Step 2, Runoff/Drainage Including 90% reduction | PECsw Step 2, Drift Including NSZ 20 m | Total VBZ 20 m + NSZ 20m | RACsed ; ch (=50 µg/L) PEC>RAC |
|------------------|---------------------|-----------------------|--------|-------------------------------------------------------|----------------------------------------|--------------------------|--------------------------------|
| Leafy vegetables | 1 x 6000 g/ha       | Mar.-May              | N      | 0.863                                                 | 0.42                                   | 1.28                     | No                             |
|                  |                     |                       | S      | 1.726                                                 | 0.42                                   | 2.14                     | No                             |
| Vines            | 1 x 6000 g/ha       | Oct.-Feb.             | N      | 2.157                                                 | 1.72                                   | 3.88                     | No                             |
|                  |                     |                       | S      | 1.726                                                 | 1.72                                   | 3.45                     | No                             |
|                  | 1 x 8000 g/ha       |                       | N      | 2.876                                                 | 1.72                                   | 4.6                      | No                             |
|                  |                     |                       | S      | 2.301                                                 | 1.72                                   | 4.02                     | No                             |

First-tier and refined  $RAC_{sed;ch}$  value **sediment-dwelling organisms** for copper compared to relevant  $PEC_{sed}$  values via drift exposure, with copper background level

| Crop                                 | Growth Stage | Maximum Application Rate<br>[g a.s. /ha] | Buffer<br>[m] | $PEC_{sed, accumulation}$<br>Total copper (10 years accumulation) + background level<br>[mg/kg] | $RAC_{sed; ch}$<br>(= 1.62 mg/kg) Total copper;<br>$PEC > RAC$ | $RAC_{sed; ch}$<br>(= 3.23 mg/kg) Total copper;<br>$PEC > RAC$ |
|--------------------------------------|--------------|------------------------------------------|---------------|-------------------------------------------------------------------------------------------------|----------------------------------------------------------------|----------------------------------------------------------------|
|                                      | BBCH         |                                          |               |                                                                                                 |                                                                |                                                                |
| Tomatoes & Cucumbers<br>Outdoor uses | oct-89       | 850                                      | Step 3        | 19.1                                                                                            | Yes                                                            | Yes                                                            |
|                                      |              |                                          | 5 m           | 17.6                                                                                            | Yes                                                            | Yes                                                            |
|                                      |              |                                          | 10 m          | 17.3                                                                                            | Yes                                                            | Yes                                                            |
|                                      |              |                                          | 20 m          | 17.1                                                                                            | Yes                                                            | Yes                                                            |
|                                      |              |                                          | 50 m          | 17.1                                                                                            | Yes                                                            | Yes                                                            |
| Tomatoes & Cucumbers<br>Outdoor uses | oct-89       | 6000 *                                   | Step 3        | 25.3                                                                                            | Yes                                                            | Yes                                                            |
|                                      |              |                                          | 5 m           | 19.2                                                                                            | Yes                                                            | Yes                                                            |
|                                      |              |                                          | 10 m          | 18.2                                                                                            | Yes                                                            | Yes                                                            |
|                                      |              |                                          | 20 m          | 17.6                                                                                            | Yes                                                            | Yes                                                            |
|                                      |              |                                          | 50 m          | 17.3                                                                                            | Yes                                                            | Yes                                                            |
| Tomatoes & Cucumbers<br>Indoor uses  | oct-89       | 1250                                     | -             | 17.2                                                                                            | Yes                                                            | Yes                                                            |
| Tomatoes & Cucumbers<br>Indoor uses  | oct-89       | 6000 *                                   | -             | 17.8                                                                                            | Yes                                                            | Yes                                                            |
| Vines (Late)                         |              | 1250                                     | Step 3        | 25.1                                                                                            | Yes                                                            | Yes                                                            |

|               |  |      |        |      |     |     |
|---------------|--|------|--------|------|-----|-----|
|               |  |      | 5 m    | 21.9 | Yes | Yes |
|               |  |      | 10 m   | 18.8 | Yes | Yes |
|               |  |      | 20 m   | 17.6 | Yes | Yes |
|               |  |      | 50 m   | 17.2 | Yes | Yes |
| Vines (Late)  |  | 6000 | Step 3 | 49.0 | Yes | Yes |
|               |  |      | 5 m    | 36.3 | Yes | Yes |
|               |  |      | 10 m   | 23.9 | Yes | Yes |
|               |  |      | 20 m   | 19.4 | Yes | Yes |
|               |  |      | 50 m   | 17.6 | Yes | Yes |
| Vines (Early) |  | 1250 | Step 3 | 19.7 | Yes | Yes |
|               |  |      | 5 m    | 18.6 | Yes | Yes |
|               |  |      | 10 m   | 17.6 | Yes | Yes |
|               |  |      | 20 m   | 17.2 | Yes | Yes |
|               |  |      | 50 m   | 17.0 | Yes | Yes |
| Vines (Early) |  | 6000 | Step 3 | 28.8 | Yes | Yes |
|               |  |      | 5 m    | 23.8 | Yes | Yes |
|               |  |      | 10 m   | 19.2 | Yes | Yes |
|               |  |      | 20 m   | 17.7 | Yes | Yes |
|               |  |      | 50 m   | 17.1 | Yes | Yes |

\* Conservative approach; no dissipation considered between applications

First-tier and refined  $RAC_{sed;ch}$  value **sediment-dwelling organisms** for copper compared to relevant  $PEC_{sed, accumulation}$  values for run-off/drainage exposure (Step 2,  $Koc = 10000 \text{ mL/g}$ ), with copper background level.

|  | Scenario | Step 2                                   |                         |                         |                                                          |                                                          |
|--|----------|------------------------------------------|-------------------------|-------------------------|----------------------------------------------------------|----------------------------------------------------------|
|  |          | Total copper (10 years background level) | Mitigation applied: 80% | Mitigation applied: 90% | $RAC_{sed; ch}$ (= 1.62 mg/kg) Total copper; $PEC > RAC$ | $RAC_{sed; ch}$ (= 3.23 mg/kg) Total copper; $PEC > RAC$ |

|                                                                          |   | PECsed, accu (mg/kg) |      |      |     |     |
|--------------------------------------------------------------------------|---|----------------------|------|------|-----|-----|
| Outdoor uses no interception, 1 * 850 g/ha; early application; march-may | N | 21.0                 | 17.8 | 17.4 | Yes | Yes |
|                                                                          | S | 24.9                 | 18.6 | 17.8 | Yes | Yes |
| Outdoor uses no interception, 1 * 850 g/ha; late application; June-Sep   | N | 21.0                 | 17.8 | 17.4 | Yes | Yes |
|                                                                          | S | 22.9                 | 18.2 | 17.6 | Yes | Yes |
| Outdoor uses no interception, 1 * 1250 g/ha; early application; Octo-Feb | N | 31.6                 | 19.9 | 18.5 | Yes | Yes |
|                                                                          | S | 28.7                 | 19.3 | 18.2 | Yes | Yes |
| Outdoor uses no interception, 1 * 1250 g/ha; late application; June-Sept | N | 22.8                 | 18.2 | 17.6 | Yes | Yes |
|                                                                          | S | 25.7                 | 18.7 | 17.9 | Yes | Yes |
| Outdoor uses no interception, 1 * 6000 g/ha; early application; Octo-Feb | N | 86.9                 | 31.0 | 24.0 | Yes | Yes |
|                                                                          | S | 72.9                 | 28.2 | 22.6 | Yes | Yes |
| Outdoor uses no interception, 1 * 6000 g/ha; late application; June-Sept | N | 45.0                 | 22.6 | 19.8 | Yes | Yes |
|                                                                          | S | 59.0                 | 25.4 | 21.2 | Yes | Yes |

**Effects on bees (Regulation (EU) N° 283/2013, Annex Part A, point 8.3.1 and Regulation (EU) N° 284/2013 Annex Part A, point 10.3.1)\***

\* This section does reflect the new EFSA Guidance Document on bees which has not yet been noted by the Standing Committee on Plants, Animals, Food and Feed.

| Species                                                                                                                                                                                                                                                                                                                                                                              | Test substance             | Time scale/type of endpoint | End point                                                                 | toxicity                                   |
|--------------------------------------------------------------------------------------------------------------------------------------------------------------------------------------------------------------------------------------------------------------------------------------------------------------------------------------------------------------------------------------|----------------------------|-----------------------------|---------------------------------------------------------------------------|--------------------------------------------|
| <i>Apis mellifera</i>                                                                                                                                                                                                                                                                                                                                                                | Copper hydroxide technical | Acute                       | Contact toxicity (LD <sub>50</sub> )                                      | <b>44.46 µg/bee</b>                        |
| <i>Apis mellifera</i>                                                                                                                                                                                                                                                                                                                                                                | Copper hydroxide WP        | Acute                       | Oral toxicity (LD <sub>50</sub> )<br>Contact toxicity (LD <sub>50</sub> ) | <b>49.0 µg/bee</b><br>>57 µg/bee           |
| <i>Apis mellifera</i>                                                                                                                                                                                                                                                                                                                                                                | Copper oxychloride         | Acute                       | Oral toxicity (LD <sub>50</sub> )<br>Contact toxicity (LD <sub>50</sub> ) | <b>12.1 µg/bee</b><br><b>44.3 µg/bee</b>   |
| <i>Apis mellifera</i>                                                                                                                                                                                                                                                                                                                                                                | Bordeaux mixture WP        | Acute                       | Oral toxicity (LD <sub>50</sub> )<br>Contact toxicity (LD <sub>50</sub> ) | <b>23.3 µg/bee</b><br>> <b>25.2 µg/bee</b> |
| <i>Apis mellifera</i>                                                                                                                                                                                                                                                                                                                                                                | Tribasic copper sulfate SC | Acute                       | Oral toxicity (LD <sub>50</sub> )<br>Contact toxicity (LD <sub>50</sub> ) | <b>40 µg/bee</b><br>> <b>23.5 µg/bee</b>   |
| <i>Apis mellifera</i>                                                                                                                                                                                                                                                                                                                                                                | Copper oxide technical     | Acute                       | Contact toxicity (LD <sub>50</sub> )                                      | >22.0 µg/bee                               |
| <i>Apis mellifera</i>                                                                                                                                                                                                                                                                                                                                                                | Copper oxide WG            | Acute                       | Oral toxicity (LD <sub>50</sub> )                                         | > <b>116.0 µg/bee</b>                      |
| <i>Apis mellifera</i>                                                                                                                                                                                                                                                                                                                                                                | Copper oxide WG            | Acute                       | Contact toxicity (LD <sub>50</sub> )                                      | > <b>82.5 µg/bee</b>                       |
| Field or semi-field tests:<br>Two outdoor cages were performed with Copper Oxychloride WP and Bordeaux mixture WP. No significant effects at rates up to 1.25 kg a.s/ha<br><br>Tunnel test performed with Copper Oxychloride WP on phacelia– single application of 2.5 kg a.s./ha. a Statistically significant reduction is observed on flight intensity at t rate of 2.5 kg a.s/ha. |                            |                             |                                                                           |                                            |

**Risk assessment for vineyards at 1250 g a.s./ha [1 application] (worst-case scenario)**

| Species               | Test substance   | Risk quotient | HQ | Trigger |
|-----------------------|------------------|---------------|----|---------|
| <i>Apis mellifera</i> | Copper hydroxide | Oral          | 26 | 50      |

| Species               | Test substance          | Risk quotient | HQ          | Trigger |
|-----------------------|-------------------------|---------------|-------------|---------|
| <i>Apis mellifera</i> | Copper oxychloride      | Oral          | <b>103</b>  | 50      |
| <i>Apis mellifera</i> | Bordeaux mixture        | Oral          | <b>54</b>   | 50      |
| <i>Apis mellifera</i> | Tribasic copper sulfate | Oral          | 31          | 50      |
| <i>Apis mellifera</i> | Copper oxide            | Oral          | < 11        | 50      |
| <i>Apis mellifera</i> | Copper hydroxide        | Contact       | 28          | 50      |
| <i>Apis mellifera</i> | Copper oxychloride      | Contact       | 28          | 50      |
| <i>Apis mellifera</i> | Bordeaux mixture        | Contact       | < <b>50</b> | 50      |
| <i>Apis mellifera</i> | Tribasic copper sulfate | Contact       | < <b>53</b> | 50      |
| <i>Apis mellifera</i> | Copper oxide            | Contact       | < 15        | 50      |

**Effects on other arthropod species (Regulation (EU) N° 283/2013, Annex Part A, point 8.3.2 and Regulation (EU) N° 284/2013 Annex Part A, point 10.3.2)**

**Laboratory tests with standard sensitive species**

| Species                       | Test Substance          | End point | Toxicity (LR <sub>50</sub> kgCu/ha) |
|-------------------------------|-------------------------|-----------|-------------------------------------|
| <i>Aphidius rhopalosiphii</i> | Copper hydroxide WP     | Mortality | <b>0.05</b>                         |
|                               | Bordeaux Mixture        | Mortality | > <b>14.7</b>                       |
|                               | Tribasic copper sulfate | Mortality | > <b>0.1344</b>                     |
|                               | Copper oxide            | Mortality | <b>39.2</b>                         |
| <i>Typhlodromus pyri</i>      | Copper hydroxide        | Mortality | > <b>14.88</b>                      |
|                               | Copper oxychloride      | Mortality | > <b>14.89</b>                      |
|                               | Bordeaux Mixture        | Mortality | > <b>13.2</b>                       |
|                               | Tribasic copper sulfate | Mortality | > <b>0.08</b>                       |
|                               | Copper oxide            | Mortality | > <b>26.1</b>                       |

**First tier risk assessment based on laboratory tests**

| Test substance                                                 | Species                | Effect<br>(LR <sub>50</sub> kgCu/ha) | HQ in-field | HQ off-field <sup>1</sup> | Trigger |
|----------------------------------------------------------------|------------------------|--------------------------------------|-------------|---------------------------|---------|
| <b>Copper hydroxide</b>                                        |                        |                                      |             |                           |         |
| <i>Using a MAF foliar</i>                                      |                        |                                      |             |                           |         |
| Vines (downy mildew) – 1.25 kgCu/ha, 8 applications            | <i>A. rhopalosiphi</i> | 0.05                                 | <b>87.5</b> | <b>5.77</b>               | 2       |
|                                                                | <i>T. pyri</i>         | >14.88                               | < 0.29      | < 0.02                    | 2       |
| Tomatoes/cucurbits – 1.25 kgCu/ha (glasshouse), 8 applications | <i>A. rhopalosiphi</i> | 0.05                                 | <b>87.5</b> | -                         | 2       |
|                                                                | <i>T. pyri</i>         | >14.88                               | < 0.29      | -                         | 2       |
| Tomatoes/cucurbits – 0.85 kgCu/ha, 8 applications              | <i>A. rhopalosiphi</i> | 0.05                                 | <b>59.5</b> | <b>3.72</b>               | 2       |
|                                                                | <i>T. pyri</i>         | >14.88                               | < 0.20      | < 0.01                    | 2       |
| <i>Using a MAFsoil* (MAFsoil = 1)</i>                          |                        |                                      |             |                           |         |
| Vines (downy mildew) –8 kg Cu/ha, 1 application.               | <i>A. rhopalosiphi</i> | 0.05                                 | <b>80</b>   | <b>6.42</b>               | 2       |
|                                                                | <i>T. pyri</i>         | >14.88                               | <0.27       | <0.02                     | 2       |
| Tomatoes/cucurbits –6 kg Cu/ha, 1 application.                 | <i>A. rhopalosiphi</i> | 0.05                                 | <b>120</b>  | -                         | 2       |
|                                                                | <i>T. pyri</i>         | >14.88                               | <0.40       | -                         | 2       |
| Tomatoes/cucurbits –8 kg Cu/ha, 1 application.                 | <i>A. rhopalosiphi</i> | 0.05                                 | <b>120</b>  | <b>9.62</b>               | 2       |
|                                                                | <i>T. pyri</i>         | >14.88                               | <0.40       | <0.03                     | 2       |
| <b>Copper oxychloride</b>                                      |                        |                                      |             |                           |         |
| <i>Using a MAF foliar</i>                                      |                        |                                      |             |                           |         |
| Vines (downy mildew) – 1.25 kgCu/ha, 8 applications            | <i>T. pyri</i>         | >14.89                               | < 0.29      | < 0.02                    | 2       |
| Tomatoes/cucurbits – 1.25 kgCu/ha (glasshouse), 8 applications | <i>T. pyri</i>         | >14.89                               | < 0.29      | -                         | 2       |
| Tomatoes/cucurbits – 0.85 kgCu/ha (glasshouse), 8 applications | <i>T. pyri</i>         | >14.89                               | < 0.20      | < 0.01                    | 2       |
| <i>Using a MAFsoil* (MAFsoil = 1)</i>                          |                        |                                      |             |                           |         |
| Vines (downy mildew) –8 kg Cu/ha, 1 application.               | <i>T. pyri</i>         | >14.89                               | <0.27       | <0.02                     | 2       |
| Tomatoes/cucurbits –6 kg Cu/ha, 1 application.                 | <i>T. pyri</i>         | >14.89                               | <0.534      | -                         | 2       |
| Tomatoes/cucurbits –8 kg Cu/ha, 1 application.                 | <i>T. pyri</i>         | 14.89                                | <0.40       | <0.03                     | 2       |
| <b>Bordeaux Mixture</b>                                        |                        |                                      |             |                           |         |
| <i>Using a MAFfoliar</i>                                       |                        |                                      |             |                           |         |



| Test substance                                                 | Species                | Effect<br>(LR <sub>50</sub> kgCu/ha) | HQ in-field    | HQ off-field <sup>1</sup> | Trigger |
|----------------------------------------------------------------|------------------------|--------------------------------------|----------------|---------------------------|---------|
| Vines (downy mildew) – 1.25 kgCu/ha, 8 applications            | <i>A. rhopalosiphi</i> | >14.7                                | < 0.29         | < 0.02                    | 2       |
|                                                                | <i>T. pyri</i>         | >13.2                                | < 0.33         | < 0.02                    | 2       |
| Tomatoes/cucurbits – 1.25 kgCu/ha (glasshouse), 8 applications | <i>A. rhopalosiphi</i> | >14.7                                | < 0.29         | -                         | 2       |
|                                                                | <i>T. pyri</i>         | >13.2                                | < 0.33         | -                         | 2       |
| Tomatoes/cucurbits – 0.85 kgCu/ha, 8 applications              | <i>A. rhopalosiphi</i> | >14.7                                | < 0.20         | < 0.01                    | 2       |
|                                                                | <i>T. pyri</i>         | >13.2                                | < 0.22         | < 0.01                    | 2       |
| <i>Using a MAFsoil* (MAFsoil = 1)</i>                          |                        |                                      |                |                           |         |
| Vines (downy mildew) – 8 kg Cu/ha, 1 application.              | <i>A. rhopalosiphi</i> | >14.7                                | < 0.27         | <0.02                     | 2       |
|                                                                | <i>T. pyri</i>         | >13.2                                | <0.30          | < 0.02                    | 2       |
| Tomatoes/cucurbits – 6 kg Cu/ha, 1 application.                | <i>A. rhopalosiphi</i> | >14.7                                | <0.54          | -                         | 2       |
|                                                                | <i>T. pyri</i>         | >13.2                                | <0.61          | -                         | 2       |
| Tomatoes/cucurbits – 8 kg Cu/ha, 1 application.                | <i>A. rhopalosiphi</i> | >14.7                                | <0.41          | <0.03                     | 2       |
|                                                                | <i>T. pyri</i>         | >13.2                                | <0.45          | <0.04                     | 2       |
| <b>Tribasic copper sulfate</b>                                 |                        |                                      |                |                           |         |
| <i>Using a MAFfoliar</i>                                       |                        |                                      |                |                           |         |
| Vines (downy mildew) – 1.25 kgCu/ha, 8 applications            | <i>A. rhopalosiphi</i> | >0.1344                              | < <b>32.55</b> | < <b>2.04</b>             | 2       |
|                                                                | <i>T. pyri</i>         | >0.08                                | < <b>54.68</b> | < <b>3.425</b>            | 2       |
| Tomatoes/cucurbits – 1.25 kgCu/ha (glasshouse), 8 applications | <i>A. rhopalosiphi</i> | >0.1344                              | < <b>32.55</b> | -                         | 2       |
|                                                                | <i>T. pyri</i>         | >0.08                                | < <b>54.68</b> | -                         | 2       |
| Tomatoes/cucurbits – 0.85 kgCu/ha, 8 applications              | <i>A. rhopalosiphi</i> | >0.1344                              | < <b>22.14</b> | < 1.38                    | 2       |
|                                                                | <i>T. pyri</i>         | >0.08                                | < <b>37.19</b> | < <b>2.32</b>             | 2       |
| <i>Using a MAFsoil* (MAFsoil = 1)</i>                          |                        |                                      |                |                           |         |
| Vines (downy mildew) – 8 kg Cu/ha, 1 application.              | <i>A. rhopalosiphi</i> | >0.1344                              | < <b>29.76</b> | < <b>2.39</b>             | 2       |
|                                                                | <i>T. pyri</i>         | >0.08                                | < <b>50</b>    | < <b>4.01</b>             | 2       |
| Tomatoes/cucurbits – 6 kg Cu/ha, 1 application.                | <i>A. rhopalosiphi</i> | >0.1344                              | < <b>59.52</b> | -                         | 2       |
|                                                                | <i>T. pyri</i>         | >0.08                                | < <b>100</b>   | -                         | 2       |
| Tomatoes/cucurbits – 8 kg Cu/ha, 1 application.                | <i>A. rhopalosiphi</i> | >0.1344                              | < <b>44.64</b> | < <b>3.58</b>             | 2       |
|                                                                | <i>T. pyri</i>         | >0.08                                | < <b>75</b>    | < <b>6.02</b>             | 2       |
| <b>Copper oxide</b>                                            |                        |                                      |                |                           |         |
| <i>Using a MAFfoliar</i>                                       |                        |                                      |                |                           |         |
| Vines (downy                                                   | <i>A. rhopalosiphi</i> | >39.2                                | < 0.11         | < 0.01                    | 2       |

| Test substance                                                 | Species                | Effect (LR <sub>50</sub> kgCu/ha) | HQ in-field | HQ off-field <sup>1</sup> | Trigger |
|----------------------------------------------------------------|------------------------|-----------------------------------|-------------|---------------------------|---------|
| mildew) – 1.25 kgCu/ha, 8 applications                         | <i>T. pyri</i>         | >26.1                             | < 0.17      | < 0.01                    | 2       |
| Tomatoes/cucurbits – 1.25 kgCu/ha (glasshouse), 8 applications | <i>A. rhopalosiphi</i> | >39.2                             | < 0.11      | -                         | 2       |
|                                                                | <i>T. pyri</i>         | >26.1                             | < 0.17      | -                         | 2       |
| Tomatoes/cucurbits – 0.85 kgCu/ha, 8 applications              | <i>A. rhopalosiphi</i> | >39.2                             | < 0.07      | < 0.01                    | 2       |
|                                                                | <i>T. pyri</i>         | >26.1                             | < 0.11      | < 0.01                    | 2       |
| <i>Using a MAFsoil* (MAFsoil = 1)</i>                          |                        |                                   |             |                           |         |
| Vines (downy mildew) –8 kg Cu/ha, 1 application.               | <i>A. rhopalosiphi</i> | >39.2                             | <0.10       | <0.01                     | 2       |
|                                                                | <i>T. pyri</i>         | >26.1                             | <0.15       | <0.01                     | 2       |
| Tomatoes/cucurbits –6 kg Cu/ha, 1 application.                 | <i>A. rhopalosiphi</i> | >39.2                             | <0.20       | -                         | 2       |
|                                                                | <i>T. pyri</i>         | >26.1                             | <0.31       | -                         | 2       |
| Tomatoes/cucurbits –8 kg Cu/ha, 1 application.                 | <i>A. rhopalosiphi</i> | >39.2                             | <0.15       | < 0.01                    | 2       |
|                                                                | <i>T. pyri</i>         | >26.1                             | <0.23       | <0.02                     | 2       |

<sup>1</sup> distance assumed to calculate the drift rate: 3 m

\* During the ecotox expert meeting it was suggested that for soil the total amount applied in the season should be used since it cannot be ensured that dissipation occur between applications. The experts agreed to use the total amount applied in the year in the risk assessment for soil NTA.

#### Further laboratory and extended laboratory studies

| Species                | Life stage | Test substance, substrate and duration | Dose (kg Cu/ha)  | End point                   | % effect <sup>2</sup> | Trigger value |
|------------------------|------------|----------------------------------------|------------------|-----------------------------|-----------------------|---------------|
| <i>T. cacoeciae</i>    | adults     | Copper hydroxide WP                    | 0.59             | parasitisation              | 6.4                   | 50 %          |
| <i>T. cacoeciae</i>    | adults     | Copper oxychloride WP                  | 2.02             | parasitisation              | - 42.9                | 50 %          |
| <i>D. rapae</i>        | adults     | Copper hydroxide WP                    | 0.59             | mortality<br>parasitisation | 14.8<br>52.5          | 50 %          |
| <i>P. cupreus</i>      | adults     | Copper hydroxide WP                    | 0.59             | mortality<br>predation      | 0<br>8.0              | 50 %          |
| <i>P. amentata</i>     | adults     | Tribasic copper sulfate SC             | 0.0202<br>0.2688 | mortality<br>predation      | 2.9<br>4.39           | 50 %          |
| <i>C. carnea</i>       | larvae     | Copper hydroxide WP                    | 0.56             | mortality<br>fecundity      | 55.6<br>71.1          | 50 %          |
| <i>C. 7-punctata</i>   | larvae     | Copper oxychloride WP                  | 0.58             | mortality<br>fecundity      | 17.5<br>- 149         | 50 %          |
| <i>C. 7-punctata</i>   | larvae     | Tribasic copper sulfate SC             | 0.0067<br>0.1344 | mortality<br>fecundity      | 20.88<br>43.8         | 50 %          |
| <i>A. rhopalosiphi</i> | adults     | Copper hydroxide WP                    | <b>3.213</b>     | Mortality<br>fecundity      | 10<br>-7.4            | 50 %          |

| Species                | Life stage | Test substance, substrate and duration | Dose (kg Cu/ha)                                       | End point      | % effect <sup>2</sup>                        | Trigger value                  |                                               |                                     |                                           |      |              |           |      |      |
|------------------------|------------|----------------------------------------|-------------------------------------------------------|----------------|----------------------------------------------|--------------------------------|-----------------------------------------------|-------------------------------------|-------------------------------------------|------|--------------|-----------|------|------|
| <i>A. rhopalosiphi</i> | adults     | Copper oxychloride WP (3D study)       | 1.0<br><b>3.97</b>                                    | mortality      | 0<br>0                                       | 50 %                           |                                               |                                     |                                           |      |              |           |      |      |
|                        |            |                                        | 1.0<br><b>3.97</b>                                    | parasitisation | - 22.38<br>10.89                             |                                |                                               |                                     |                                           |      |              |           |      |      |
| <i>A. rhopalosiphi</i> | adults     | Tribasic copper sulfate                | 0.00154<br>0.00768<br>0.0384<br>0.192<br><b>0.960</b> | mortality      | 0.0<br>2.5<br>2.5<br>5.0<br>2.5              | 50 %                           |                                               |                                     |                                           |      |              |           |      |      |
|                        |            |                                        | 0.00154<br>0.00768<br>0.0384<br>0.192<br><b>0.960</b> | parasitisation | - 29.8<br>- 72.6<br>- 40.4<br>- 13.8<br>30.5 |                                |                                               |                                     |                                           |      |              |           |      |      |
|                        |            |                                        | <i>T. pyri</i>                                        | protonymphs    | Copper hydroxide WP                          |                                | <b>3.213</b>                                  | mortality                           | -7.4                                      | 50 % |              |           |      |      |
|                        |            |                                        |                                                       |                |                                              |                                |                                               | fecundity                           | 16.9                                      |      |              |           |      |      |
|                        |            |                                        | <i>T. pyri</i>                                        | protonymphs    | Tribasic copper sulfate SC                   |                                | 0.015<br>0.06<br>0.25<br>1.01<br><b>4.032</b> | mortality                           | 1.8<br>3.5<br>13.9<br>3.5<br>0.0          | 50 % |              |           |      |      |
|                        |            |                                        |                                                       |                |                                              |                                | 0.015<br>0.06<br>0.25<br>1.01<br><b>4.032</b> | fecundity                           | - 7.3<br>- 17.1<br>- 11.0<br>12.2<br>31.7 |      |              |           |      |      |
|                        |            |                                        |                                                       |                |                                              |                                | <i>C. carnea</i>                              | larvae                              | Copper hydroxyde WP                       |      | <b>1.922</b> | Mortality | 12.5 | 50 % |
|                        |            |                                        |                                                       |                |                                              |                                |                                               |                                     |                                           |      |              | fecundity | 0    |      |
| <i>C. carnea</i>       | larvae     | Copper oxychloride WP                  |                                                       |                |                                              | 0.5<br>1<br>2<br>4<br><b>8</b> | mortality                                     | 4.8<br>21.4<br>11.9<br>23.8<br>40.5 | 50 %                                      |      |              |           |      |      |
|                        |            |                                        |                                                       |                |                                              | 0.5<br>1<br>2<br>4<br><b>8</b> | fecundity                                     | 1.7<br>16.7<br>7.9<br>15.3<br>6.7   |                                           |      |              |           |      |      |

<sup>2</sup> positive percentages relate to adverse effects

**Risk assessment** for – [representative use] at [application rate] g a.s./ha [x number of applications] based on extended lab test

| Test substance and GAP         | Species | ER <sub>50</sub> (g/ha) | In-field rate | Off-field rate <sup>1</sup> |
|--------------------------------|---------|-------------------------|---------------|-----------------------------|
| <b><i>Copper hydroxyde</i></b> |         |                         |               |                             |
| <i>Using a MAFfoliar</i>       |         |                         |               |                             |

| Test substance and GAP                                         | Species                   | ER <sub>50</sub> (g/ha) | In-field rate | Off-field rate <sup>1</sup> |
|----------------------------------------------------------------|---------------------------|-------------------------|---------------|-----------------------------|
| Vines (downy mildew) – 1.25 kgCu/ha, 8 applications            | <i>A. rhopalosiphi</i>    | 3.268                   | 2.1875        | 0.068                       |
|                                                                | <i>T. pyri</i>            | 3.268                   | 2.1875        | 0.068                       |
|                                                                | <i>Chrysoperla carnea</i> | 1.9224                  | <b>2.1875</b> | 0.068                       |
| Tomatoes/cucurbits – 1.25 kgCu/ha (glasshouse), 8 applications | <i>A. rhopalosiphi</i>    | 3.268                   | <b>4.375</b>  | -                           |
|                                                                | <i>T. pyri</i>            | 3.268                   | <b>4.375</b>  | -                           |
|                                                                | <i>Chrysoperla carnea</i> | 1.9224                  | <b>4.375</b>  | -                           |
| Tomatoes/cucurbits – 0.85 kgCu/ha, 8 applications              | <i>A. rhopalosiphi</i>    | 3.268                   | 2.975         | 0.093                       |
|                                                                | <i>T. pyri</i>            | 3.268                   | 2.975         | 0.093                       |
|                                                                | <i>Chrysoperla carnea</i> | 1.9224                  | <b>2.975</b>  | 0.093                       |
| <i>Using a MAFsoil* (MAFsoil = 1)</i>                          |                           |                         |               |                             |
| Vines (downy mildew) –4 kg Cu/ha, 1 application.               | <i>A. rhopalosiphi</i>    | 3.268                   | <b>4</b>      | 0.321                       |
|                                                                | <i>T. pyri</i>            | 3.268                   | <b>4</b>      | 0.321                       |
|                                                                | <i>Chrysoperla carnea</i> | 1.9224                  | <b>4</b>      | 0.321                       |
| Tomatoes/cucurbits –6 kg Cu/ha, 1 application.                 | <i>A. rhopalosiphi</i>    | 3.268                   | <b>6</b>      | -                           |
|                                                                | <i>T. pyri</i>            | 3.268                   | <b>6</b>      | -                           |
|                                                                | <i>Chrysoperla carnea</i> | 1.9224                  | <b>6</b>      | -                           |
| Tomatoes/cucurbits –8 kg Cu/ha, 1 application.                 | <i>A. rhopalosiphi</i>    | 3.268                   | <b>8</b>      | 0.481                       |
|                                                                | <i>T. pyri</i>            | 3.268                   | <b>8</b>      | 0.481                       |
|                                                                | <i>Chrysoperla carnea</i> | 1.9224                  | <b>8</b>      | 0.481                       |
| <b><i>Copper oxychloride</i></b>                               |                           |                         |               |                             |
| <i>Using a MAF foliar</i>                                      |                           |                         |               |                             |
| Vines (downy mildew) – 1.25 kgCu/ha, 8 applications            | <i>A. rhopalosiphi</i>    | 3.97                    | 2.1875        | 0.068                       |
|                                                                | <i>Chrysoperla carnea</i> | 8                       | 2.1875        | 0.068                       |
| Tomatoes/cucurbits – 1.25 kgCu/ha (glasshouse), 8 applications | <i>A. rhopalosiphi</i>    | 3.97                    | <b>4.375</b>  | -                           |
|                                                                | <i>Chrysoperla carnea</i> | 8                       | 4.375         | -                           |

| Test substance and GAP                                         | Species                      | ER <sub>50</sub> (g/ha) | In-field rate | Off-field rate <sup>1</sup> |
|----------------------------------------------------------------|------------------------------|-------------------------|---------------|-----------------------------|
| Tomatoes/cucurbits – 0.85 kgCu/ha, 8 applications              | <i>A. rhopalosiphi</i>       | 3.97                    | 2.975         | 0.093                       |
|                                                                | <i>Chrysoperla carnea</i>    | 8                       | 2.975         | 0.093                       |
| <i>Using a MAFsoil* (MAFsoil = 1)</i>                          |                              |                         |               |                             |
| Vines (downy mildew) 4 kg Cu/ha, 1 application.                | <i>A. rhopalosiphi</i> (3D)  | 3.97                    | <b>4</b>      | 0.321                       |
|                                                                | <i>Chrysoperla carnea</i>    | 8                       | 4             | 0.321                       |
| Tomatoes/cucurbits – 6 kg Cu/ha, 1 application.                | <i>A. rhopalosiphi</i> (3D)  | 3.97                    | <b>6</b>      | -                           |
|                                                                | <i>Chrysoperla carnea</i>    | 8                       | 6             | -                           |
| Tomatoes/cucurbits –8 kg Cu/ha, 1 application.                 | <i>A. rhopalosiphi</i> (3D)  | 3.97                    | <b>8</b>      | 0.117-0.481                 |
|                                                                | <i>Chrysoperla carnea</i>    | 8                       | <b>8</b>      | 0.117-0.481                 |
| <b><i>Tribasic copper sulfate</i></b>                          |                              |                         |               |                             |
| <i>Using a MAF foliar</i>                                      |                              |                         |               |                             |
| Vines (downy mildew) – 1.25 kgCu/ha, 8 applications            | <i>Typhlodromus pyri</i>     | 4.032                   | 2.1875        | 0.068                       |
|                                                                | <i>Aphidius rhopalosiphi</i> | 0.96                    | <b>2.1875</b> | 0.068                       |
| Tomatoes/cucurbits – 1.25 kgCu/ha (glasshouse), 8 applications | <i>Typhlodromus pyri</i>     | 4.032                   | <b>4.375</b>  | -                           |
|                                                                | <i>Aphidius rhopalosiphi</i> | 0.96                    | <b>4.375</b>  | -                           |
| Tomatoes/cucurbits – 0.85 kgCu/ha, 8 applications              | <i>Typhlodromus pyri</i>     | 4.032                   | <b>2.975</b>  | 0.093                       |
|                                                                | <i>Aphidius rhopalosiphi</i> | 0.96                    | <b>2.975</b>  | 0.093                       |
| <i>Using a MAFsoil* (MAFsoil = 1)</i>                          |                              |                         |               |                             |
| Vines (downy mildew) –4 kg Cu/ha, 1 application.               | <i>Typhlodromus pyri</i>     | 4.032                   | <b>4</b>      | 0.321                       |
|                                                                | <i>Aphidius rhopalosiphi</i> | 0.96                    | 4             | 0.321                       |
| Tomatoes/cucurbits –6 kg Cu/ha, 1 application.                 | <i>Typhlodromus pyri</i>     | 4.032                   | <b>6</b>      | -                           |
|                                                                | <i>Aphidius rhopalosiphi</i> | 0.96                    | <b>6</b>      | -                           |
| Tomatoes/cucurbits 8 kg Cu/ha, 1 application.                  | <i>Typhlodromus pyri</i>     | 4.032                   | <b>8</b>      | 0.481                       |
|                                                                | <i>Aphidius rhopalosiphi</i> | 0.96                    | <b>8</b>      | 0.481                       |

<sup>1</sup>indicate distance assumed to calculate the drift rate and if 3D or 2D.

|                           |
|---------------------------|
| Semi-field or field tests |
| Not required              |

**Effects on non-target soil meso- and macro fauna; effects on soil nitrogen transformation  
(Regulation (EU) N° 283/2013, Annex Part A, points 8.4, 8.5, and Regulation (EU) N° 284/2013  
Annex Part A, points 10.4, 10.5)**

| Test organism         | Test substance                                       | Application method of test a.s./ OM <sup>1</sup> | Time scale      | End point                       | Toxicity (mg Cu/kg soil) <sup>1</sup>                                                                                                       |
|-----------------------|------------------------------------------------------|--------------------------------------------------|-----------------|---------------------------------|---------------------------------------------------------------------------------------------------------------------------------------------|
| <b>Earthworms</b>     |                                                      |                                                  |                 |                                 |                                                                                                                                             |
| <i>Eisenia fetida</i> | Copper oxychloride                                   | OECD soil                                        | Chronic 56 days | Reproduction                    | NOEC <sub>r(cp)</sub> < 40.5                                                                                                                |
| <i>Eisenia andrei</i> | Copper chloride                                      | LUFA:<br>3.9%<br>OECD:<br>10%                    | Chronic 28 days | Reproduction                    | <b>NOEC<sub>r(cp)</sub> = 8.4 (LUFA 2.2 soil)</b><br>NOEC <sub>r(cp)</sub> = 103.2 (OECD soil)<br>NOEC <sub>r(jp)</sub> = 103.2 (OECD soil) |
| <i>Eisenia fetida</i> | Copper chloride                                      | 10%                                              | Chronic 28 days | Reproduction                    | NOEC <sub>r(cp)</sub> = 13.2 (OECD soil)<br>NOEC <sub>r(jp)</sub> = 35.2 (OECD soil) and 37.2 (LUFA 2.2 soil)                               |
| <i>Eisenia fetida</i> | Copper chloride                                      | 4.7%                                             | Chronic 21 days | Reproduction, growth            | NOEC <sub>g</sub> = 715<br>NOEC <sub>r</sub> = 115                                                                                          |
| <i>Eisenia fetida</i> | Cu oxychloride                                       | 10%                                              | Chronic 28 days | Reproduction                    | NOEC <sub>r(cp)</sub> = 83.2                                                                                                                |
| <i>Eisenia fetida</i> | Cu(NO <sub>3</sub> ) <sub>2</sub> ·3H <sub>2</sub> O | 10%                                              | Chronic 28 days | Reproduction                    | NOEC <sub>r(cp)</sub> = 28.2                                                                                                                |
| <i>Eisenia fetida</i> | Copper nitrate                                       | 10%                                              | Chronic 56 days | Mortality, reproduction         | LC <sub>50</sub> = 555<br>NOEC <sub>m</sub> = 202.4<br>EC <sub>50</sub> (cocoons) = 53.3<br>NOEC <sub>r(cp)</sub> = 12.4                    |
| <i>Eisenia fetida</i> | Copper nitrate                                       | 10%                                              | Chronic 21 days | Growth, reproduction, mortality | NOEC <sub>r(cp)</sub> = 32.3<br>NOEC <sub>g</sub> = 728.2<br>NOEC <sub>m</sub> = 296.2                                                      |
| <i>Eisenia fetida</i> | Cu acetate                                           |                                                  | Chronic 28 days | Mortality                       | LC <sub>50</sub> = 82.8 – 3717                                                                                                              |
| <i>Eisenia fetida</i> | CuCl <sub>2</sub>                                    | -                                                | Chronic 21 days | Growth, mortality               | NOEC=300 (mortality and growth)                                                                                                             |
| <i>Eisenia fetida</i> | Copper chloride                                      | -                                                | Chronic 28 days | Reproduction                    | EC <sub>10,r</sub> = 54 – 324 (17 values for different soil types)                                                                          |
| <i>Eisenia andrei</i> | Unknown                                              | 3.7%                                             | Chronic 28 days | Reproduction                    | EC <sub>10,r</sub> = 159                                                                                                                    |
| <i>Eisenia andrei</i> | Copper chloride                                      | 0.5%                                             | Chronic 28 days | Reproduction, mortality         | NOEC <sub>m</sub> = 192<br>NOEC <sub>r</sub> = 192                                                                                          |

| Test organism                                                        | Test substance  | Application method of test a.s./ OM <sup>1</sup> | Time scale             | End point                       | Toxicity (mg Cu/kg soil) <sup>1</sup>                                                                                                                         |
|----------------------------------------------------------------------|-----------------|--------------------------------------------------|------------------------|---------------------------------|---------------------------------------------------------------------------------------------------------------------------------------------------------------|
| <i>Eisenia andrei</i>                                                | Copper salt     | 10%                                              | Chronic 84 days        | Growth                          | NOEC <sub>g</sub> = 59.2                                                                                                                                      |
| <i>Eisenia andrei</i>                                                | Copper chloride | 10%                                              | Chronic 28 days        | Reproduction                    | NOEC <sub>r(cp)</sub> = 123.2                                                                                                                                 |
| <i>Eisenia andrei</i>                                                | Copper chloride | 10%                                              | Chronic 84 days        | Growth                          | EC <sub>50</sub> > 100<br>NOEC <sub>g</sub> = 62                                                                                                              |
| <i>Lumbricus rubellus</i>                                            | Copper chloride | -                                                | Chronic 84 days        | Mortality                       | NOEC <sub>m</sub> = 162                                                                                                                                       |
| <i>Lumbricus rubellus</i>                                            | Copper chloride | 3.4-5.7%                                         | Chronic 42 days        | Growth, reproduction, mortality | NOEC <sub>r</sub> = 54<br>NOEC <sub>lb</sub> = 54<br>NOEC <sub>g</sub> = 131<br>NOEC <sub>m</sub> = 131<br>NOEC <sub>lb</sub> = 63<br>NOEC <sub>m</sub> = 136 |
| <i>Lumbricus rubellus</i>                                            | Copper chloride | 9.8%                                             | Chronic 294 days       | Growth                          | NOEC <sub>g</sub> = 154                                                                                                                                       |
| <i>Lumbricus rubellus</i>                                            | Copper chloride | 0.5%                                             | Chronic 110 days       | Growth, mortality               | NOEC <sub>g</sub> = 76<br>NOEC <sub>m</sub> = 153                                                                                                             |
| <i>Allobophora caliginosa</i><br>(= <i>Aporrectodea caliginosa</i> ) | Copper sulfate  | -                                                | Chronic 14 days        | Mortality, reproduction         | NOEC <sub>m</sub> = 511<br>NOEC <sub>r(cp)</sub> = 60.7                                                                                                       |
| <i>Aporrectodea caliginosa</i>                                       | Copper sulfate  | 21.6%                                            | Chronic 42 and 56 days | Growth, reproduction            | NOEC <sub>g</sub> = 35.7<br>NOEC <sub>r(cp)</sub> = 80.7                                                                                                      |
| <i>Dendrobaena rubida</i>                                            | Copper nitrate  | 7.7-11.7%                                        | Chronic 90 days        | Reproduction                    | NOEC <sub>r(cp)</sub> = 100 (pH 5.5) and 101.3 (pH 6.5)                                                                                                       |
| <i>Dendrobaena rubida</i>                                            | Copper nitrate  | 7.7-11.7%                                        | Chronic 120 days       | Reproduction                    | 4 month-NOEC (cocoon reduction) = 100                                                                                                                         |
| <i>Octolasion cyaneum</i>                                            | Copper sulfate  | 5.4-72%                                          | Chronic 14 and 30 days | Mortality                       | 30 d – NOEC <sub>m</sub> = 153<br>14 d – NOEC <sub>m</sub> = 1214                                                                                             |
| Other soil macroorganisms                                            |                 |                                                  |                        |                                 |                                                                                                                                                               |

| Test organism                                       | Test substance  | Application method of test a.s./ OM <sup>1</sup> | Time scale   | End point                       | Toxicity (mg Cu/kg soil) <sup>1</sup>                                                                                                                                                                                                                                    |
|-----------------------------------------------------|-----------------|--------------------------------------------------|--------------|---------------------------------|--------------------------------------------------------------------------------------------------------------------------------------------------------------------------------------------------------------------------------------------------------------------------|
| <b><i>Enchytraeidae (Oligochaeta, Annelida)</i></b> |                 |                                                  |              |                                 |                                                                                                                                                                                                                                                                          |
| <i>Cognettia sphagnetorum</i>                       | Copper chloride | 66%                                              | 70 days      | Growth                          | 35-day EC <sub>10, g</sub> = 73.7<br>63-day EC <sub>10, g</sub> = 451.7<br>42-day EC <sub>10, g</sub> = 322.7<br>70-day EC <sub>10, f</sub> = 465.7                                                                                                                      |
| <i>E. albidus</i>                                   | Copper chloride | 5.5%                                             | 42 days      | Mortality, growth, reproduction | EC <sub>10, m</sub> = 347<br>EC <sub>10, r</sub> = 71<br>EC <sub>10, a</sub> = 362<br>NOEC <sub>m</sub> = 430<br>NOEC <sub>r</sub> = 230<br>NOEC <sub>a</sub> = 230                                                                                                      |
| <i>E. albidus</i>                                   | Copper chloride | 3.6%                                             | 42 days      | Mortality, growth, reproduction | EC <sub>10, r</sub> (soil 1) = 355<br>EC <sub>10, r</sub> (soil 2) = 107<br>EC <sub>10, r</sub> (soil 3) = 72<br>EC <sub>10, r</sub> (soil 4) = 119<br>EC <sub>10, r</sub> (soil 5) = 399<br>EC <sub>10, r</sub> (soil 6) = 241<br>NOEC in field transects: 418 to ≥ 689 |
| <i>E. crypticus</i>                                 | Copper chloride | 3.9%                                             | 56 days      | Reproduction                    | EC <sub>50</sub> (reprod., 11°C) ≈ 70<br>EC <sub>50</sub> (reprod., 18°C) ≈ 160<br>EC <sub>50</sub> (reprod., 25°C) ≈ 180                                                                                                                                                |
| <i>E. crypticus</i>                                 | Copper chloride | 4.6%                                             | 21 days      | Reproduction                    | EC <sub>10, r</sub> = 126.5<br>NOEC <sub>r</sub> = 135                                                                                                                                                                                                                   |
| <i>E. crypticus</i>                                 | Copper chloride | 3.9%                                             | 63 days      | Reproduction                    | 21-day EC <sub>10, r</sub> = 180.2<br>63-day EC <sub>10, r</sub> = 90.2                                                                                                                                                                                                  |
| <i>E. crypticus</i>                                 | Copper chloride | 3%                                               | Not reported | Reproduction, mortality         | EC <sub>10, r</sub> = 55<br>EC <sub>10, m</sub> = 62                                                                                                                                                                                                                     |
| <b><i>Collembola (Hexapoda, Arthropoda)</i></b>     |                 |                                                  |              |                                 |                                                                                                                                                                                                                                                                          |



| Test organism             | Test substance  | Application method of test a.s./ OM <sup>1</sup> | Time scale    | End point                       | Toxicity (mg Cu/kg soil) <sup>1</sup>                                                                                                                                                                                                                                                                                                                      |
|---------------------------|-----------------|--------------------------------------------------|---------------|---------------------------------|------------------------------------------------------------------------------------------------------------------------------------------------------------------------------------------------------------------------------------------------------------------------------------------------------------------------------------------------------------|
| <i>Folsomia candida</i>   | Copper chloride | 1.4-37%                                          | 28 days       | Reproduction                    | EC <sub>10,r</sub> = 31 – 1460<br>(21 values for different soil types)                                                                                                                                                                                                                                                                                     |
| <i>Folsomia candida</i>   | Copper nitrate  | -                                                | 28 days       | Reproduction, mortality         | EC <sub>50,r</sub> (pH 6.0) = 703.2<br>NOEC <sub>r</sub> (pH 6.0) = 203.2<br>NOEC <sub>m</sub> (pH 6.0) = ≥3003.2<br>EC <sub>50,r</sub> (pH 5.0) = 713.2<br>NOEC <sub>r</sub> (pH 5.0) = 203.2<br>NOEC <sub>m</sub> (pH 5.0) = 43.2<br>EC <sub>50,r</sub> (pH 4.5) = 1483.2<br>NOEC <sub>r</sub> (pH 4.5) = 1003.2<br>NOEC <sub>m</sub> (pH 4.5) = ≥3003.2 |
| <i>Folsomia candida</i>   | Copper chloride | 10%                                              | 42 days       | Reproduction, mortality         | NOEC <sub>r</sub> = 203.2<br>NOEC <sub>m</sub> = 1003.2                                                                                                                                                                                                                                                                                                    |
| <i>Folsomia candida</i>   | Copper chloride | 10%                                              | 28 days       |                                 | NOEC <sub>ri</sub> = 803.2                                                                                                                                                                                                                                                                                                                                 |
| <i>Folsomia candida</i>   | Copper chloride | -                                                | 21 or 56 days | Growth, reproduction            | 21-day NOEC <sub>g</sub> (LUF 2.2) = 205.2<br>21-day NOEC <sub>r</sub> (LUF 2.2) = 405.2<br>56-day NOEC <sub>g</sub> (OECD) = 803.2<br>56-day NOEC <sub>r</sub> (OECD) = 403.2                                                                                                                                                                             |
| <i>Folsomia candida</i>   | Copper chloride | 3%                                               | Not reported  | Reproduction                    | EC <sub>10,r</sub> = 212<br>NOEC = 320                                                                                                                                                                                                                                                                                                                     |
| <i>Folsomia fimetaria</i> | Copper chloride | 3.9%                                             | 21 days       | Growth, reproduction, mortality | 14-day EC <sub>10,r</sub> = 43*<br>21-day EC <sub>10,r</sub> = 61*<br>21-day EC <sub>10,g</sub> (male) = 850<br>21-day EC <sub>10,g</sub> (female) = 547<br>21-day EC <sub>10,g</sub> (juvenile) = 532<br>21-day NOEC <sub>m</sub> (male and female) ≥ 1005<br>21-day EC <sub>10,m</sub> (juvenile) = 883                                                  |

| Test organism                          | Test substance  | Application method of test a.s./ OM <sup>1</sup> | Time scale    | End point                          | Toxicity (mg Cu/kg soil) <sup>1</sup>                                                                                                                                                                                                                                                                                                            |
|----------------------------------------|-----------------|--------------------------------------------------|---------------|------------------------------------|--------------------------------------------------------------------------------------------------------------------------------------------------------------------------------------------------------------------------------------------------------------------------------------------------------------------------------------------------|
| <i>Folsomia fimetaria</i>              | Copper chloride | 4.7%                                             | 21 days       | Growth, reproduction, mortality    | EC <sub>10, m</sub> (overall) = 828<br>EC <sub>10, m</sub> (female) = 519<br>EC <sub>10, m</sub> (male) = 771<br>EC <sub>10, g</sub> (overall) = 1090<br>EC <sub>10, g</sub> (overall) = 997<br>EC <sub>10, g</sub> (overall) = 1242<br>EC <sub>10, r</sub> = 352<br>EC <sub>10</sub> > 2911 (high background - historical Cu contaminated site) |
| <i>Folsomia fimetaria</i>              | Copper sulfate  | 4.5%                                             | 21 days       | Reproduction                       | EC <sub>10, r</sub> = 141                                                                                                                                                                                                                                                                                                                        |
| <i>Folsomia fimetaria</i>              | Copper sulfate  | 4.5%                                             | 21 days       | Reproduction                       | EC <sub>10, r</sub> = 667                                                                                                                                                                                                                                                                                                                        |
| <i>Isotoma viridis</i>                 | Copper chloride | 3.9%                                             | 56 days       | Growth                             | NOEC <sub>g</sub> (LUFA 2.2) = 55.2<br>NOEC <sub>g</sub> (OECD) = 403                                                                                                                                                                                                                                                                            |
| <b>Isopoda (Crustacea, Arthropoda)</b> |                 |                                                  |               |                                    |                                                                                                                                                                                                                                                                                                                                                  |
| <i>Porcellio scaber</i>                | Copper chloride | -                                                | 4 and 8 weeks | Growth                             | 8-week LC <sub>50</sub> = 2880<br>4-week EC <sub>10, g</sub> (body mass gain) = 349                                                                                                                                                                                                                                                              |
| <b>Acari (Arachnida, Arthropoda)</b>   |                 |                                                  |               |                                    |                                                                                                                                                                                                                                                                                                                                                  |
| <i>Platynothrus peltifer</i>           | Copper nitrate  | 3.9                                              | 90 days       | Growth, Mortality and reproduction | NOEC <sub>m</sub> ≥ 1498<br>NOEC <sub>g</sub> = 598<br>NOEC <sub>r</sub> = 168                                                                                                                                                                                                                                                                   |
| <i>Platynothrus peltifer</i>           | Copper chloride | 3.9                                              | 70 days       | Reproduction                       | NOEC <sub>r</sub> = 68.2                                                                                                                                                                                                                                                                                                                         |
| <i>Hypoaspis aculeifer</i>             | Copper chloride | 3.9                                              | 21 days       | Reproduction                       | <b>EC<sub>10</sub> = 179</b>                                                                                                                                                                                                                                                                                                                     |
| <i>Hypoaspis aculeifer</i>             | Copper chloride | 3.0                                              | Not reported  | Reproduction                       | EC <sub>10, r</sub> = 2*<br>NOEC <sub>r</sub> = 320                                                                                                                                                                                                                                                                                              |
| <b>Nematoda (Nematoda)</b>             |                 |                                                  |               |                                    |                                                                                                                                                                                                                                                                                                                                                  |
| <i>Plectus acuminatus</i>              | Copper chloride | -                                                | 21 days       | Reproduction                       | EC <sub>50, r(jp)</sub> = 165.2<br>NOEC <sub>r(jp)</sub> = 35.2                                                                                                                                                                                                                                                                                  |

\* EC<sub>10</sub> below lowest dose tested and therefore not considered reliable (OECD, 2006<sup>13</sup>)

<sup>1</sup> NOEC<sub>r(cp)</sub> = NOEC reproduction based on cocoons production; NOEC<sub>r(jp)</sub> = NOEC reproduction based on juveniles production; NOEC<sub>g</sub> = NOEC based on growth; NOEC<sub>m</sub> = NOEC based on mortality; NOEC<sub>lb</sub> = NOEC based on litter breakdown; EC<sub>10, f</sub> = EC10 based on fragmentation; EC<sub>10, a</sub> = EC10 based on avoidance

|                                                                                                                                                                                                                                               |
|-----------------------------------------------------------------------------------------------------------------------------------------------------------------------------------------------------------------------------------------------|
| Higher tier testing (e.g. modelling or field studies)                                                                                                                                                                                         |
| <i>Earthworms</i>                                                                                                                                                                                                                             |
| Field study - A field study on earthworm populations has been conducted over 10 years on grassland, with copper applications every year. After 10 years of treatment with copper the NOAEC of the study is the dose rate 4 kg copper/ha/year. |

### Soil micro-organisms

|                                                                                                                                                                                                                                                           |                            |                                      |
|-----------------------------------------------------------------------------------------------------------------------------------------------------------------------------------------------------------------------------------------------------------|----------------------------|--------------------------------------|
| Nitrogen transformation                                                                                                                                                                                                                                   | Copper hydroxide WP        | no effect at day 62 at 12.5 kg Cu/ha |
|                                                                                                                                                                                                                                                           | Copper oxychloride WP      | no effect at day 28 at 12.4 kg Cu/ha |
|                                                                                                                                                                                                                                                           | Copper oxychloride WP      | no effect at day 28 at 18.1 kg Cu/ha |
|                                                                                                                                                                                                                                                           | Bordeaux mixture WP        | no effect at day 28 at 20.0 kg Cu/ha |
|                                                                                                                                                                                                                                                           | Tribasic copper sulfate SC | no effect at day 28 at 11.6 kg Cu/ha |
|                                                                                                                                                                                                                                                           | Copper oxide WP            | no effect at day 28 at 15.0 kg Cu/ha |
| Field studies                                                                                                                                                                                                                                             |                            |                                      |
| A multi-field site study was carried out in three sites in France. Up to four months after treatment with Copper Hydroxide WP (8 x 2 kg Cu/ha and 48 kg Cu/ha) there were no effects on the CO <sub>2</sub> evolution and nitrogen mineralization.        |                            |                                      |
| There was no either evidence of significant effects on evolved CO <sub>2</sub> and nitrogen nitrification after a 28-day incubation in the presence of ground vine leaves, based on soils contaminated with Copper Hydroxide WP at 16 kg and 48 kg Cu/ha. |                            |                                      |

### Toxicity/exposure ratios for soil organisms

[Representative use] at [application rate] g a.s./ha [x number of applications]

| Test organism                    | Crop and application rate | Time scale | Soil PEC <sup>1</sup> | TER          | Trigger |
|----------------------------------|---------------------------|------------|-----------------------|--------------|---------|
| <b>Earthworms</b>                |                           |            |                       |              |         |
| <i>Eisenia andrei</i>            | Vineyards                 | Chronic    | 240                   | <b>0.035</b> | 5       |
| <i>Eisenia andrei</i>            | Tomatoes/Cucurbits        | Chronic    | 54                    | <b>0.156</b> | 5       |
| <b>Other soil macroorganisms</b> |                           |            |                       |              |         |
| <i>Folsomia candida</i>          | Vineyards                 | Chronic    | 240                   | <b>0.13</b>  | 5       |
| <i>Folsomia candida</i>          | Tomatoes/Cucurbits        | Chronic    | 54                    | <b>0.57</b>  | 5       |
| <i>Hypoaspis aculeifer</i>       | Vineyards                 | Chronic    | 240                   | <b>0.75</b>  | 5       |
| <i>Hypoaspis aculeifer</i>       | Tomatoes/Cucurbits        | Chronic    | 54                    | <b>3.31</b>  | 5       |

<sup>1</sup>PEC accumulation. These PECsoil are representative for added copper for a time period of 10 years considering a range of different background values through two values derived for European arable soils (90<sup>th</sup> percentile values).

**Effects on terrestrial non target higher plants (Regulation (EU) N° 283/2013, Annex Part A, point 8.6 and Regulation (EU) N° 284/2013 Annex Part A, point 10.6)**

## Screening data

|                                                                                                     |
|-----------------------------------------------------------------------------------------------------|
| Not required for herbicides or plant growth regulators as ER <sub>50</sub> tests should be provided |
|-----------------------------------------------------------------------------------------------------|

## Laboratory dose response tests

| Species  | Test substance                     | ER <sub>50</sub> (g/ha) <sup>2</sup><br>vegetative vigour | ER <sub>50</sub> (g/ha) <sup>2</sup><br>emergence | Exposure <sup>1</sup><br>(g/ha) <sup>2</sup>                                                                                        | TER                | Trigger |
|----------|------------------------------------|-----------------------------------------------------------|---------------------------------------------------|-------------------------------------------------------------------------------------------------------------------------------------|--------------------|---------|
| 6 specie | 5 different copper-based test item | >2 000                                                    | -                                                 | -Vineyard: 100.25 g a.s./ha (3 m distance, late application (8.02%))<br>-Tomatoes/cucurbits: 34.625 g a.s./ha (1m distance (2.77%)) | >19.9<br><br>>57.8 | 5       |

Extended laboratory studies :-

Semi-field and field test:-

<sup>1</sup> exposure has been estimated with Ganzelmeier drift data<sup>2</sup> dose is expressed in units of a.s.
**Effects on biological methods for sewage treatment (Regulation (EU) N° 283/2013, Annex Part A, point 8.8)**

| Test type/organism    | end point                                                 |
|-----------------------|-----------------------------------------------------------|
| Activated sludge      | EC <sub>50</sub> = 43 mg Cu/L (Copper hydroxide)          |
| Activated sludge      | EC <sub>50</sub> = 269 mg Cu/L (Copper oxychloride)       |
| Activated sludge      | EC <sub>50</sub> = 337 mg Cu/L (Bordeaux Mixture)         |
| Activated sludge      | EC <sub>50</sub> > 15.5 mg Cu/L (Tribasic copper sulfate) |
| Activated sludge      | EC <sub>50</sub> = 157 mg Cu/L (Copper oxide)             |
| <i>Pseudomonas sp</i> | No study submitted                                        |

**Monitoring data (Regulation (EU) N° 283/2013, Annex Part A, point 8.9 and Regulation (EU) N° 284/2013, Annex Part A, point 10.8)**

|                                                                 |
|-----------------------------------------------------------------|
| Available monitoring data concerning adverse effect of the a.s. |
|-----------------------------------------------------------------|

|                                                                                                                                                                                                                                                                                                        |
|--------------------------------------------------------------------------------------------------------------------------------------------------------------------------------------------------------------------------------------------------------------------------------------------------------|
| Earthworm's field studies were submitted. Those studies give indication of an effect of copper content in soil on earthworm species abundance and diversity especially for endogeic earthworm's specie, such as <i>Aporrectodea caliginosa</i> for soils with total copper content > 100 mg Cu/kg d.w. |
|--------------------------------------------------------------------------------------------------------------------------------------------------------------------------------------------------------------------------------------------------------------------------------------------------------|

|                                                         |
|---------------------------------------------------------|
| Available monitoring data concerning effect of the PPP. |
|---------------------------------------------------------|

|      |
|------|
| None |
|------|

**Definition of the residue for monitoring (Regulation (EU) N° 283/2013, Annex Part A, point 7.4.2)  
Ecotoxicologically relevant compounds<sup>1</sup>**

| Compartment |                            |
|-------------|----------------------------|
| soil        | Total copper               |
| water       | Total and dissolved copper |
| sediment    | Total copper               |
| groundwater | Dissolved copper           |

<sup>1</sup> metabolites are considered relevant when, based on the risk assessment, they pose a risk comparable or higher than the parent

## Classification and labelling with regard to ecotoxicological data (Regulation (EU) N° 283/2013, Annex Part A, Section 10)

Substance

Harmonised classification according to Regulation (EC) No 1272/2008<sup>14</sup> and its Adaptations to Technical Process [Table 3.1 of Annex VI of Regulation (EC) No 1272/2008 as amended]<sup>15</sup>:

Peer review proposal<sup>16</sup> for harmonised classification according to Regulation (EC) No 1272/2008:

Copper hydroxyde

Aquatic acute 1, H400: Very toxic to aquatic life (Acute M = 10)

Aquatic chronic 1, H410: Very toxic to aquatic life with long lasting effects (Chronic M = 10)

Substance

Harmonised classification according to Regulation (EC) No 1272/2008 and its Adaptations to Technical Process [Table 3.1 of Annex VI of Regulation (EC) No 1272/2008 as amended]:

Peer review proposal for harmonised classification according to Regulation (EC) No 1272/2008:

Copper oxychloride

Aquatic acute 1, H400: Very toxic to aquatic life (Acute M = 10)

Aquatic chronic 1, H410: Very toxic to aquatic life with long lasting effects (Chronic M = 10)

Substance

Harmonised classification according to Regulation (EC) No 1272/2008 and its Adaptations to Technical Process [Table 3.1 of Annex VI of Regulation (EC) No 1272/2008 as amended]:

Peer review proposal for harmonised classification according to Regulation (EC) No 1272/2008:

Bordeaux mixture

Aquatic acute 1, H400: Very toxic to aquatic life (Acute M = 10)

Aquatic chronic 1, H410: Very toxic to aquatic life with long lasting effects (Chronic M = 10)

Substance

Harmonised classification according to Regulation (EC) No 1272/2008 and its Adaptations to Technical Process [Table 3.1 of Annex VI of Regulation (EC) No 1272/2008 as amended]:

Peer review proposal for harmonised classification according to Regulation (EC) No 1272/2008:

Tribasic copper sulfate

Aquatic acute 1, H400: Very toxic to aquatic life (Acute M = 1)

Aquatic chronic 1, H410: Very toxic to aquatic life with long lasting effects (Chronic M = 10)

Substance

Copper (I) oxide

<sup>14</sup> Regulation (EC) No 1272/2008 of the European Parliament and of the Council of 16 December 2008 on classification, labelling and packaging of substances and mixtures, amending and repealing Directives 67/548/EEC and 1999/45/EC, and amending Regulation (EC) No 1907/2006. OJ L 353, 31.12.2008, 1-1355.

<sup>15</sup> Commission Regulation (EU) 2016/1179 of 19 July 2016 amending, for the purposes of its adaptation to technical and scientific progress, Regulation (EC) No 1272/2008 of the European Parliament and of the Council on classification, labelling and packaging of substances and mixtures. OJ L 195, 20.7.2016, 11-25.

<sup>16</sup> It should be noted that harmonised classification and labelling is formally proposed and decided in accordance with Regulation (EC) No 1272/2008.

Harmonised classification according to Regulation (EC) No 1272/2008 and its Adaptations to Technical Process [Table 3.1 of Annex VI of Regulation (EC) No 1272/2008 as amended]:

Peer review proposal for harmonised classification according to Regulation (EC) No 1272/2008:

Aquatic acute 1, H400: Very toxic to aquatic life (Acute M = 100)

Aquatic chronic 1, H410: Very toxic to aquatic life with long lasting effects (Chronic M = 100)
